# Supplementary material for: Hematopoietic mosaic chromosomal alterations and risk for infection among 767,891 individuals without blood cancer
Source: medRxiv preprint, doi:10.1101/2020.11.12.20230821, version 1 (2020-11-16)
Supplement: Supplementary Data 1-8 [file 230821_file03.xlsx]

## Sheet: S.Data1
Supplementary Data 1: Infection phenotypic grouping categories across organ systems used in the UK Biobank, MGB Biobank, and Biobank Japan
Organ System	Category	UK Biobank Field ID	Description
Skin and subcutaneous tissue	Dermatologic Infections	131696	Date L00 first reported (staphylococcal scalded skin syndrome)
Skin and subcutaneous tissue	Dermatologic Infections	131698	Date L01 first reported (impetigo)
Skin and subcutaneous tissue	Dermatologic Infections	131700	Date L02 first reported (cutaneous abscess, furuncle and carbuncle)
Skin and subcutaneous tissue	Dermatologic Infections	131702	Date L03 first reported (cellulitis)
Skin and subcutaneous tissue	Dermatologic Infections	131704	Date L04 first reported (acute lymphadenitis)
Skin and subcutaneous tissue	Dermatologic Infections	131706	Date L05 first reported (pilonidal cyst)
Skin and subcutaneous tissue	Dermatologic Infections	131708	Date L08 first reported (other local infections of skin and subcutaneous tissue)
Skin and subcutaneous tissue	Dermatologic Infections	130174	Date B00 first reported (herpesviral [herpes simplex] infections)
Skin and subcutaneous tissue	Dermatologic Infections	130176	Date B01 first reported (varicella [chickenpox])
Skin and subcutaneous tissue	Dermatologic Infections	130178	Date B02 first reported (zoster [herpes zoster])
Skin and subcutaneous tissue	Dermatologic Infections	130180	Date B03 first reported (smallpox)
Skin and subcutaneous tissue	Dermatologic Infections	130182	Date B04 first reported (monkeypox)
Skin and subcutaneous tissue	Dermatologic Infections	130184	Date B05 first reported (measles)
Skin and subcutaneous tissue	Dermatologic Infections	130186	Date B06 first reported (rubella [german measles])
Skin and subcutaneous tissue	Dermatologic Infections	130188	Date B07 first reported (viral warts)
Skin and subcutaneous tissue	Dermatologic Infections	130190	Date B08 first reported (other viral infections characterised by skin and mucous membrane lesions, not elsewhere classified)
Skin and subcutaneous tissue	Dermatologic Infections	130192	Date B09 first reported (unspecified viral infection characterised by skin and mucous membrane lesions)
Skin and subcutaneous tissue	Dermatologic Infections	130226	Date B35 first reported (dermatophytosis)
Skin and subcutaneous tissue	Dermatologic Infections	130228	Date B36 first reported (other superficial mycoses)
Skin and subcutaneous tissue	Dermatologic Infections	130318	Date B85 first reported (pediculosis and phthiriasis)
Skin and subcutaneous tissue	Dermatologic Infections	130320	Date B86 first reported (scabies)
Skin and subcutaneous tissue	Dermatologic Infections	130322	Date B87 first reported (myiasis)
Sepsis	Sepsis	130068	Date A40 first reported (streptococcal septicaemia)
Sepsis	Sepsis	130070	Date A41 first reported (other septicaemia)
Respiratory System	Acute Upper Respiratory Infections	131424	Date J00 first reported (acute nasopharyngitis [common cold])
Respiratory System	Acute Upper Respiratory Infections	131426	Date J01 first reported (acute sinusitis)
Respiratory System	Acute Upper Respiratory Infections	131428	Date J02 first reported (acute pharyngitis)
Respiratory System	Acute Upper Respiratory Infections	131430	Date J03 first reported (acute tonsillitis)
Respiratory System	Acute Upper Respiratory Infections	131432	Date J04 first reported (acute laryngitis and tracheitis)
Respiratory System	Acute Upper Respiratory Infections	131434	Date J05 first reported (acute obstructive laryngitis [croup] and epiglottitis)
Respiratory System	Acute Upper Respiratory Infections	131436	Date J06 first reported (acute upper respiratory infections of multiple and unspecified sites)
Respiratory System	Acute Upper Respiratory Infections	130340	Date B97 first reported (viral agents as the cause of diseases classified to other chapters)
Respiratory System	Acute Upper Respiratory Infections	130062	Date A37 first reported (whooping cough)
Respiratory System	Influenza	131438	Date J09 first reported (influenza due to certain identified influenza virus)
Respiratory System	Influenza	131440	Date J10 first reported (influenza due to identified influenza virus)
Respiratory System	Influenza	131442	Date J11 first reported (influenza, virus not identified)
Respiratory System	Other Acute Lower Respiratory Infections	131458	Date J20 first reported (acute bronchitis)
Respiratory System	Other Acute Lower Respiratory Infections	131460	Date J21 first reported (acute bronchiolitis)
Respiratory System	Other Acute Lower Respiratory Infections	131462	Date J22 first reported (unspecified acute lower respiratory infection)
Respiratory System	Pneumonia	131444	Date J12 first reported (viral pneumonia, not elsewhere classified)
Respiratory System	Pneumonia	131446	Date J13 first reported (pneumonia due to streptococcus pneumoniae)
Respiratory System	Pneumonia	131448	Date J14 first reported (pneumonia due to haemophilus influenzae)
Respiratory System	Pneumonia	131450	Date J15 first reported (bacterial pneumonia, not elsewhere classified)
Respiratory System	Pneumonia	131452	Date J16 first reported (pneumonia due to other infectious organisms, not elsewhere classified)
Respiratory System	Pneumonia	131454	Date J17 first reported (pneumonia in diseases classified elsewhere)
Respiratory System	Pneumonia	131456	Date J18 first reported (pneumonia, organism unspecified)
Respiratory System	Respiratory Abscess	131476	Date J36 first reported (peritonsillar abscess)
Respiratory System	Respiratory Abscess	131530	Date J85 first reported (abscess of lung and mediastinum)
Respiratory System	Respiratory Abscess	131532	Date J86 first reported (pyothorax)
Respiratory System	Respiratory Mycoses	130232	Date B38 first reported (coccidioidomycosis)
Respiratory System	Respiratory Mycoses	130234	Date B39 first reported (histoplasmosis)
Respiratory System	Respiratory Mycoses	130236	Date B40 first reported (blastomycosis)
Respiratory System	Respiratory Mycoses	130238	Date B41 first reported (paracoccidioidomycosis)
Respiratory System	Respiratory Mycoses	130240	Date B42 first reported (sporotrichosis)
Respiratory System	Respiratory Mycoses	130242	Date B43 first reported (chromomycosis and phaeomycotic abscess)
Respiratory System	Respiratory Mycoses	130244	Date B44 first reported (aspergillosis)
Respiratory System	Respiratory Mycoses	130246	Date B45 first reported (cryptococcosis)
Respiratory System	Respiratory Tuberculosis	130020	Date A15 first reported (respiratory tuberculosis, bacteriologically and histologically confirmed)
Respiratory System	Respiratory Tuberculosis	130022	Date A16 first reported (respiratory tuberculosis, not confirmed bacteriologically or histologically)
Nervous System	Intracranial or Intraspinal Abscess	131004	Date G06 first reported (intracranial and intraspinal abscess and granuloma)
Nervous System	Intracranial or Intraspinal Abscess	131006	Date G07 first reported (intracranial and intraspinal abscess and granuloma in diseases classified elsewhere)
Nervous System	Meningitis or Encephalitis	130992	Date G00 first reported (bacterial meningitis, not elsewhere classified)
Nervous System	Meningitis or Encephalitis	130994	Date G01 first reported (meningitis in bacterial diseases classified elsewhere)
Nervous System	Meningitis or Encephalitis	130996	Date G02 first reported (meningitis in other infectious and parasitic diseases classified elsewhere)
Nervous System	Meningitis or Encephalitis	130998	Date G03 first reported (meningitis due to other and unspecified causes)
Nervous System	Meningitis or Encephalitis	131000	Date G04 first reported (encephalitis, myelitis and encephalomyelitis)
Nervous System	Meningitis or Encephalitis	131002	Date G05 first reported (encephalitis, myelitis and encephalomyelitis in diseases classified elsewhere)
Nervous System	Meningitis or Encephalitis	130024	Date A17 first reported (tuberculosis of nervous system)
Nervous System	Meningitis or Encephalitis	130134	Date A80 first reported (acute poliomyelitis)
Nervous System	Meningitis or Encephalitis	130136	Date A81 first reported (atypical virus infections of central nervous system)
Nervous System	Meningitis or Encephalitis	130138	Date A82 first reported (rabies)
Nervous System	Meningitis or Encephalitis	130140	Date A83 first reported (mosquito-borne viral encephalitis)
Nervous System	Meningitis or Encephalitis	130142	Date A84 first reported (tick-borne viral encephalitis)
Nervous System	Meningitis or Encephalitis	130144	Date A85 first reported (other viral encephalitis, not elsewhere classified)
Nervous System	Meningitis or Encephalitis	130146	Date A86 first reported (unspecified viral encephalitis)
Nervous System	Meningitis or Encephalitis	130148	Date A87 first reported (viral meningitis)
Nervous System	Meningitis or Encephalitis	130150	Date A88 first reported (other viral infections of central nervous system, not elsewhere classified)
Nervous System	Meningitis or Encephalitis	130152	Date A89 first reported (unspecified viral infection of central nervous system)
Nervous System	Meningitis or Encephalitis	130066	Date A39 first reported (meningococcal infection)
Nervous System	Meningitis or Encephalitis	130330	Date B91 first reported (sequelae of poliomyelitis)
Musculoskeletal System	Infectious Arthropathies	131840	Date M00 first reported (pyogenic arthritis)
Musculoskeletal System	Infectious Arthropathies	131842	Date M01 first reported (direct infections of joint in infectious and parasitic diseases classified elsewhere)
Musculoskeletal System	Infectious Arthropathies	131844	Date M02 first reported (reactive arthropathies)
Musculoskeletal System	Infectious Arthropathies	131846	Date M03 first reported (postinfective and reactive arthropathies in diseases classified elsewhere)
Musculoskeletal System	Myositis	131930	Date M60 first reported (myositis)
Musculoskeletal System	Osteomyelitis	131974	Date M86 first reported (osteomyelitis)
Genitourinary System	Female Gynecological Infections	132108	Date N71 first reported (inflammatory disease of uterus, except cervix)
Genitourinary System	Female Gynecological Infections	132110	Date N72 first reported (inflammatory disease of cervix uteri)
Genitourinary System	Female Gynecological Infections	132112	Date N73 first reported (other female pelvic inflammatory diseases)
Genitourinary System	Female Gynecological Infections	132114	Date N74 first reported (female pelvic inflammatory disorders in diseases classified elsewhere)
Genitourinary System	Female Gynecological Infections	132118	Date N76 first reported (other inflammation of vagina and vulva)
Genitourinary System	Male Genitourinary Infections	132074	Date N41 first reported (inflammatory diseases of prostate)
Genitourinary System	Male Genitourinary Infections	132082	Date N45 first reported (orchitis and epididymitis)
Genitourinary System	Male Genitourinary Infections	132106	Date N70 first reported (salpingitis and oophoritis)
Genitourinary System	Pregnancy, childbirth, and puerperial infections	132200	Date O23 first reported (infections of genito-urinary tract in pregnancy)
Genitourinary System	Pregnancy, childbirth, and puerperial infections	132286	Date O85 first reported (puerperal sepsis)
Genitourinary System	Pregnancy, childbirth, and puerperial infections	132288	Date O86 first reported (other puerperal infections)
Genitourinary System	Pregnancy, childbirth, and puerperial infections	132298	Date O91 first reported (infections of breast associated with childbirth)
Genitourinary System	Pregnancy, childbirth, and puerperial infections	132310	Date O98 first reported (maternal infectious and parasitic diseases classifiable elsewhere but complicating pregnancy, childbirth and the puerperium)
Genitourinary System	Pyelonephritis or UTI	132016	Date N10 first reported (acute tubulo-interstitial nephritis)
Genitourinary System	Pyelonephritis or UTI	132026	Date N15 first reported (other renal tubulo-interstitial diseases)
Genitourinary System	Pyelonephritis or UTI	132054	Date N30 first reported (cystitis)
Genitourinary System	Pyelonephritis or UTI	132070	Date N39 first reported (other disorders of urinary system)
Genitourinary System	Pyelonephritis or UTI	130338	Date B96 first reported (other bacterial agents as the cause of diseases classified to other chapters)
Genitourinary System	Sexually Transmitted Infections	130084	Date A50 first reported (congenital syphilis)
Genitourinary System	Sexually Transmitted Infections	130086	Date A51 first reported (early syphilis)
Genitourinary System	Sexually Transmitted Infections	130088	Date A52 first reported (late syphilis)
Genitourinary System	Sexually Transmitted Infections	130090	Date A53 first reported (other and unspecified syphilis)
Genitourinary System	Sexually Transmitted Infections	130092	Date A54 first reported (gonococcal infection)
Genitourinary System	Sexually Transmitted Infections	130094	Date A55 first reported (chlamydial lymphogranuloma (venereum))
Genitourinary System	Sexually Transmitted Infections	130096	Date A56 first reported (other sexually transmitted chlamydial diseases)
Genitourinary System	Sexually Transmitted Infections	130098	Date A57 first reported (chancroid)
Genitourinary System	Sexually Transmitted Infections	130100	Date A58 first reported (granuloma inguinale)
Genitourinary System	Sexually Transmitted Infections	130102	Date A59 first reported (trichomoniasis)
Genitourinary System	Sexually Transmitted Infections	130104	Date A60 first reported (anogenital herpesviral [herpes simplex] infections)
Genitourinary System	Sexually Transmitted Infections	130106	Date A63 first reported (other predominantly sexually transmitted diseases, not elsewhere classified)
Genitourinary System	Sexually Transmitted Infections	130108	Date A64 first reported (unspecified sexually transmitted disease)
Genitourinary System	Pyelonephritis or UTI	132062	Date N34 first reported (urethritis and urethral syndrome)
Eye, Ear, and Mastoid	Conjunctivitis	131142	Date H10 first reported (conjunctivitis)
Eye, Ear, and Mastoid	Conjunctivitis	130220	Date B30 first reported (viral conjunctivitis)
Eye, Ear, and Mastoid	Mastoiditis	131238	Date H70 first reported (mastoiditis and related conditions)
Eye, Ear, and Mastoid	Otitis Media and Externa	131222	Date H60 first reported (otitis externa)
Eye, Ear, and Mastoid	Otitis Media and Externa	131230	Date H66 first reported (suppurative and unspecified otitis media)
Digestive System	Appendicitis, peritonitis, pancreatitis	131604	Date K35 first reported (acute appendicitis)
Digestive System	Anal Abscess	131644	Date K61 first reported (abscess of anal and rectal regions)
Digestive System	Appendicitis, peritonitis, pancreatitis	131652	Date K65 first reported (peritonitis)
Digestive System	Appendicitis, peritonitis, pancreatitis	131656	Date K67 first reported (disorders of peritoneum in infectious diseases classified elsewhere)
Digestive System	Appendicitis, peritonitis, pancreatitis	131682	Date K85 first reported (acute pancreatitis)
Digestive System	Gastroentritis	130000	Date A00 first reported (cholera)
Digestive System	Gastroentritis	130002	Date A01 first reported (typhoid and paratyphoid fevers)
Digestive System	Gastroentritis	130004	Date A02 first reported (other salmonella infections)
Digestive System	Gastroentritis	130006	Date A03 first reported (shigellosis)
Digestive System	Gastroentritis	130008	Date A04 first reported (other bacterial intestinal infections)
Digestive System	Gastroentritis	130010	Date A05 first reported (other bacterial foodborne intoxications)
Digestive System	Gastroentritis	130012	Date A06 first reported (amoebiasis)
Digestive System	Gastroentritis	130014	Date A07 first reported (other protozoal intestinal diseases)
Digestive System	Gastroentritis	130016	Date A08 first reported (viral and other specified intestinal infections)
Digestive System	Gastroentritis	130018	Date A09 first reported (diarrhoea and gastro-enteritis of presumed infectious origin)
Digestive System	H. Pylori and Vibrio Vulnificus	130342	Date B98 first reported (other specified infectious agents as the cause of diseases classified to other chapters)
Digestive System	Helminthiases	130280	Date B65 first reported (schistosomiasis [bilharziasis])
Digestive System	Helminthiases	130282	Date B66 first reported (other fluke infections)
Digestive System	Helminthiases	130284	Date B67 first reported (echinococcosis)
Digestive System	Helminthiases	130286	Date B68 first reported (taeniasis)
Digestive System	Helminthiases	130290	Date B70 first reported (diphyllobothriasis and sparganosis)
Digestive System	Helminthiases	130292	Date B71 first reported (other cestode infections)
Digestive System	Helminthiases	130294	Date B72 first reported (dracunculiasis)
Digestive System	Helminthiases	130300	Date B75 first reported (trichinellosis)
Digestive System	Helminthiases	130302	Date B76 first reported (hookworm diseases)
Digestive System	Helminthiases	130304	Date B77 first reported (ascariasis)
Digestive System	Helminthiases	130308	Date B79 first reported (trichuriasis)
Digestive System	Helminthiases	130310	Date B80 first reported (enterobiasis)
Digestive System	Helminthiases	130312	Date B81 first reported (other intestinal helminthiases, not elsewhere classified)
Digestive System	Helminthiases	130314	Date B82 first reported (unspecified intestinal parasitism)
Digestive System	Helminthiases	130316	Date B83 first reported (other helminthiases)
Digestive System	Hepatitis	130194	Date B15 first reported (acute hepatitis a)
Digestive System	Hepatitis	130196	Date B16 first reported (acute hepatitis b)
Digestive System	Hepatitis	130198	Date B17 first reported (other acute viral hepatitis)
Digestive System	Hepatitis	130200	Date B18 first reported (chronic viral hepatitis)
Digestive System	Hepatitis	130202	Date B19 first reported (unspecified viral hepatitis)
Cardiac Infections	Endocarditis, Myocarditis, or Pericarditis	131314	Date I30 first reported (acute pericarditis)
Cardiac Infections	Endocarditis, Myocarditis, or Pericarditis	131320	Date I33 first reported (acute and subacute endocarditis)
Cardiac Infections	Endocarditis, Myocarditis, or Pericarditis	131330	Date I38 first reported (endocarditis, valve unspecified)
Cardiac Infections	Endocarditis, Myocarditis, or Pericarditis	131332	Date I39 first reported (endocarditis and heart valve disorders in diseases classified elsewhere)
Cardiac Infections	Endocarditis, Myocarditis, or Pericarditis	131334	Date I40 first reported (acute myocarditis)
Any infection	All	All organ-system infections below, including all A00-B99 categories

## Sheet: S.Data2
Supplementary Data 2: Infection phenotypic grouping categories across organ systems used in FinnGen (includes ICD10, 9, and 8 codes as specified)
Organ System	Category	FinnGen_Endpoint	FinnGen_Description	ICD10	ICD9	ICD8
ALL	ALL	AB1_INFECTIONS	Certain infectious and parasitic diseases	A|B	--	--
Cardiac Infections	Endocarditis, Myocarditis, or Pericarditis	I9_PERICARD	Pericarditis	I30|I32	420	420
Cardiac Infections	Endocarditis, Myocarditis, or Pericarditis	I9_ENDOCARD	Endocarditis	I33|I38|I39	421|4249|0932A	421
Cardiac Infections	Endocarditis, Myocarditis, or Pericarditis	I9_MYOCARD	Myocarditis	I4[0-1]	422	0742|422
Digestive System	Appendicitis, peritonitis, pancreatitis	K11_APPENDACUT	Acute appendicitis	K35	540	540
Digestive System	Anal Abscess	K11_ABSCANAL	Abscess of anal and rectal regions	K61	566	566
Digestive System	Appendicitis, peritonitis, pancreatitis	K11_PERITONITIS	Acute peritonitis	K65	567	567
Digestive System	Appendicitis, peritonitis, pancreatitis	K11_PERITONINOTH	Disorders of peritoneum in infectious diseases classified elsewhere	K67	--	--
Digestive System	Appendicitis, peritonitis, pancreatitis	K11_ACUTPANC	Acute pancreatitis	K85	5770	5770
Digestive System	Gastroentritis	AB1_INTESTINAL_INFECTIONS	Intestinal infectious diseases	A0[0-9]	00[1-9]	00[0-9]
Digestive System	Helminthiases	AB1_HELMINTIASES	Helminthiases	B6[5-9]|B7[0-9]|B8[0-3]	12[0-3]	12[0-9]|13602
Digestive System	Hepatitis	AB1_VIRAL_HEPATITIS	Viral hepatitis	B1[5-9]	07[0]	07[0-0]
Eye, Ear, and Mastoid	Conjunctivitis	H7_CONJUNCTIVITISACUNONATOPIC	Conjunctivitis (acute, non atopic)	H10|H13[1-2]	3720	360
Eye, Ear, and Mastoid	Conjunctivitis	H7_CONJUNCTIVITISCHRON	Chronic conjunctivitis	H104	3721	--
Eye, Ear, and Mastoid	Conjunctivitis	AB1_VIRAAL_CONJUNCT	Viral conjunctivitis	B30	07[7]	07[8]
Eye, Ear, and Mastoid	Mastoiditis	H8_MASTACU	Acute mastoiditis	H700	3830	3820|3830
Eye, Ear, and Mastoid	Mastoiditis	H8_MASTCHRON	Chronic mastoiditis	H701	3831	3821|3831
Eye, Ear, and Mastoid	Mastoiditis	H8_PETROS	Petrositis	H702	--	--
Eye, Ear, and Mastoid	Mastoiditis	H8_MASTNAS	Other/unspecified mastoiditis and related conditions	H70[8-9]	3839	3829|3839
Eye, Ear, and Mastoid	Otitis Media and Externa	H8_EXTOTITIS	Otitis externa	H60	3801	3800
Eye, Ear, and Mastoid	Otitis Media and Externa	H8_MED_SUPP	Suppurative and unspecified otitis media	H66	382	3810|3819
Genitourinary System	Female Gynecological Infections	N14_FEMALEGENINF	Inflammatory diseases of female pelvic organs	N7	614-616	612|613|614|616|620|622
Genitourinary System	Male Genitourinary Infections	N14_PROSTATITIS	Inflammatory diseases of prostate (prostatitis)	N41	601	601
Genitourinary System	Male Genitourinary Infections	N14_ORHCEPINDIDYMITIS	Orchitis and epididymitis	N45	604	604
Genitourinary System	Pregnancy, childbirth, and puerperial infections	O15_PREG_GU_INFECT	Infections of genitourinary tract in pregnancy	O23	646[5-6]	635
Genitourinary System	Pregnancy, childbirth, and puerperial infections	O15_PUERP_SEPSIS	Puerperal sepsis	O85	670	670
Genitourinary System	Pregnancy, childbirth, and puerperial infections	O15_PUERP_INFECT_OTHER	Other puerperal infections	O86	--	67299
Genitourinary System	Pregnancy, childbirth, and puerperial infections	O15_BIRTH_BREAT_INFECT	Infections of breast associated with childbirth	O91	675	6780[12]
Genitourinary System	Pregnancy, childbirth, and puerperial infections	O15_MATERN_INFECT_ELSEWHERE	Maternal infectious and parasitic diseases classifiable elsewhere but complicating pregnancy, childbirth and the puerperium	O98	647	--
Genitourinary System	Pyelonephritis or UTI	N14_PYELONEPHR	Acute tubulo-interstitial nephritis	N10	5901	5901
Genitourinary System	Pyelonephritis or UTI	N14_RENALTUBULOOTH	Other renal tubulo-interstitial diseases	N15	5902|5909	5902|5909
Genitourinary System	Pyelonephritis or UTI	N14_CYSTITIS	Cystitis	N30	595	595
Genitourinary System	Sexually Transmitted Infections	AB1_SEXUAL_TRANSMISSION	Infections with a predominantly sexual mode of transmission	A5[0-9]|A6[0-4]	09[0-9]|0541|131|0781C	09[0-9]|131
Genitourinary System	Pyelonephritis or UTI	N14_URETHRITISANDURSYNDR	Urehtritis and urethral syndrome	N34	--	597
Musculoskeletal System	Infectious Arthropathies	M13_PYOGARTH	Pyogenic arthritis	M0[0-1]	7110|7119	710
Musculoskeletal System	Infectious Arthropathies	M13_REACTARTH	Reactive arthropathies	M0[2-3]	7111|7115|7118|713	71490
Musculoskeletal System	Myositis	M13_MYOSITIS	Myositis	M60	7280	732
Musculoskeletal System	Osteomyelitis	M13_OSTEOMYELITIS	Osteomyelitis	M86	730[0-9]	720
Nervous System	Intracranial or Intraspinal Abscess	G6_CNSABSC	Intracranial and intraspinal abscess and granuloma	G06|G07	324	322
Nervous System	Meningitis or Encephalitis	G6_MENINGBACT	Bacterial meningitis	G0[0-1]	320	320
Nervous System	Meningitis or Encephalitis	G6_MENINGVIR	Viral meningitis	G020	$!$	--
Nervous System	Meningitis or Encephalitis	G6_MENINGOTH	Other meningitis	G0[2-3]	322	--
Nervous System	Meningitis or Encephalitis	G6_ADEM	Acute disseminated encephalitis/encephalomyelitis	G040	3235A	32300
Nervous System	Meningitis or Encephalitis	G6_ENCEPHBACT	Bacterial meningoecephalitis and meningomyelitis	G042|G050	3238A	--
Nervous System	Meningitis or Encephalitis	G6_ENCEPHOTH	Other encephalitis	G041|G04[8-9]|G05	3238B|3238X	3230[8-9]
Nervous System	Meningitis or Encephalitis	TBC_NEURO	Tuberculosis of nervous system	A17	013	013
Nervous System	Meningitis or Encephalitis	AB1_VIRAL_CNS	Viral infections of the central nervous system	A8[0-9]	04[5-9]|071|06[2-4]	04[0-3]|06[2-5]|071
Nervous System	Meningitis or Encephalitis	AB1_MENINGOCOCCAL	Meningococcal infection	A39	03[6]	03[6]
Respiratory System	Acute Upper Respiratory Infections	J10_UPPERINFEC	Acute upper respiratory infections	J0[0-6]	460-465	460-465
Respiratory System	Acute Upper Respiratory Infections	AB1_WHOOPCOUGH	Whooping cough	A37	03[3]	03[3]
Respiratory System	Acute Upper Respiratory Infections	AB1_SCARLET_FEVER	Scarlet fever	A38	03[4]	03[4]
Respiratory System	Influenza	J10_INFLUENZA	All influenza	J09|J1[0-1]	487	47[0-4]
Respiratory System	Other Acute Lower Respiratory Infections	J10_BRONCHITIS	Acute bronchitis	J20	4660	--
Respiratory System	Other Acute Lower Respiratory Infections	J10_BRONCHIOLITIS	Acute bronchiolitis	J21	4661	--
Respiratory System	Other Acute Lower Respiratory Infections	J10_ACUTELOWERNAS	Unspecified acute lower respiratory infection	J22	$!$	46699
Respiratory System	Pneumonia	J10_PNEUMONIA	All pneumoniae	J12-J18	480-486	480-486
Respiratory System	Respiratory Abscess	J10_PERITONSABSC	Peritonsillar abscess	J36	475	501
Respiratory System	Respiratory Abscess	J10_NECROTIC	Suppurative and necrotic conditions of lower respiratory tract	J8[5-6]	510.513	510.514
Respiratory System	Respiratory Mycoses	AB1_COCCIDIOIDOMYCOSIS	Coccidioidomycosis	B38	114	114
Respiratory System	Respiratory Mycoses	AB1_HISTOPLASMOSIS	Histoplasmosis	B39	115	115
Respiratory System	Respiratory Mycoses	AB1_BLASTOMYCOSIS	Blastomycosis	B40	116	116
Respiratory System	Respiratory Mycoses	AB1_PARACOCCIDIOIDOMYCOSIS	Paracoccidioidomycosis	B41	--	--
Respiratory System	Respiratory Mycoses	AB1_SPOROTRICHOSIS	Sporotrichosis	B42	1171A	1171
Respiratory System	Respiratory Mycoses	AB1_CHROMOMYCOCIS	Chromomycosis and phaeomycotic abscess	B43	1172	1172
Respiratory System	Respiratory Mycoses	AB1_ASPERGILLOSIS	Aspergillosis	B44	1173	1173
Respiratory System	Respiratory Mycoses	AB1_CRYPTOCOCCOSIS	Cryptococcosis	B45	1175A	--
Respiratory System	Respiratory Tuberculosis	AB1_RESP_TUBERCU	Respiratry tuberculosis	A15-A16	011-012	011-012
Sepsis	Sepsis	AB1_SEPSIS	Septicaemia	A40-A41	038	038
Skin and subcutaneous tissue	Dermatologic Infections	L12_INFECT_SKIN	Infections of the skin and subcutaneous tissue	L0	680-686	680-686
Skin and subcutaneous tissue	Dermatologic Infections	AB1_VIRAL_SKIN_MUCOUS_MEMBRANE	Viral infections characterized by skin and mucous membrane lesions	B0[0-9]	078[0-4]	079[0-1]
Skin and subcutaneous tissue	Dermatologic Infections	AB1_DERMATOPHYTOSIS	Dermatophytosis	B35	110	110
Skin and subcutaneous tissue	Dermatologic Infections	AB1_OTHER_SUPERF_MYCOSIS	Other superficial mycoses	B36	111	111
Skin and subcutaneous tissue	Dermatologic Infections	AB1_PEDICULOSIS_AND_PHTHIRIAASIS	Pediculosis and phthiriasis	B85	13[2-3]	13[2-3]
Skin and subcutaneous tissue	Dermatologic Infections	AB1_SCABIES	Scabies	B86	1330A	1330
Skin and subcutaneous tissue	Dermatologic Infections	AB1_MYIASIS	Myiasis	B87	1340A	1340

## Sheet: S.Data3
Supplementary Data 3: 63 independent loci identified in the expanded mCA GWAS
locus	REF	ALT	rsid	Gene	Consequence	clin_sig	metasvm	LOF_LOFTEE	PolyPhen	SIFT	hgvsp	AF	AC	AN	info	beta	standard_error	z_stat	P
14:96180695	G	T	rs2887399	TCL1A	upstream_gene_variant	[null]	NA	NA	NA	NA	NA	0.20645	135027	654046	0.99275	-0.35634	0.019456	-18.315	6.2826e-75
3:150014399	T	G	rs6440668	NA	regulatory_region_variant	[null]	NA	NA	NA	NA	NA	0.83773	547917	654048	1	-0.30688	0.018427	-16.654	2.8259e-62
18:60920854	C	T	rs17758695	BCL2	intron_variant	[null]	NA	NA	NA	NA	NA	0.030404	19886	654048	1	-0.76139	0.055602	-13.694	1.1099e-42
17:7571752	T	G	rs78378222	TP53	3_prime_UTR_variant	[null,["risk_factor"]]	NA	NA	NA	NA	NA	0.01197	7829	654048	0.95483	0.61137	0.054056	11.31	1.1735e-29
1:156200671	T	C	rs2842870	PMF1-BGLAP	intron_variant	[null]	NA	NA	NA	NA	NA	0.35725	233660	654048	0.99978	0.16775	0.014953	11.219	3.3076e-29
6:109597641	T	C	rs6925716	NA	intergenic_variant	[null]	NA	NA	NA	NA	NA	0.51766	338575	654048	0.99921	-0.15839	0.014514	-10.912	1.0062e-27
14:101178715	C	G	rs72698720	NA	regulatory_region_variant	[null]	NA	NA	NA	NA	NA	0.13722	89749	654048	0.98816	-0.23989	0.022466	-10.678	1.294e-26
20:30431070	G	T	rs7266148	FOXS1	downstream_gene_variant	[null]	NA	NA	NA	NA	NA	0.21315	139408	654048	0.99379	-0.19379	0.018404	-10.53	6.2758e-26
18:42078951	G	A	rs188050966	CTC-782O7.1	intron_variant	[null]	NA	NA	NA	NA	NA	0.12676	82906	654048	0.99753	0.2142	0.020619	10.388	2.8059e-25
6:164472121	G	A	rs2874705	NA	intergenic_variant	[null]	NA	NA	NA	NA	NA	0.40707	266241	654048	0.9979	-0.15324	0.014896	-10.287	8.0474e-25
7:1919539	C	T	rs4721146	MAD1L1	intron_variant	[null]	NA	NA	NA	NA	NA	0.40157	262648	654048	0.99744	0.15057	0.014642	10.283	8.3799e-25
18:42161643	G	T	rs1849209	NA	intergenic_variant	[null]	NA	NA	NA	NA	NA	0.76524	500506	654048	0.99631	0.17285	0.017641	9.7981	1.1472e-22
3:101267385	T	C	rs13062095	NA	intergenic_variant	[null]	NA	NA	NA	NA	NA	0.33593	219713	654046	0.99363	0.1446	0.015114	9.567	1.1007e-21
8:30285091	G	C	rs2979469	RBPMS	intron_variant	[null]	NA	NA	NA	NA	NA	0.74094	484609	654048	0.99359	0.15783	0.01708	9.2406	2.4507e-20
11:108314362	A	C	rs4255510	C11orf65	intron_variant	[null]	NA	NA	NA	NA	NA	0.40671	266008	654048	0.99427	0.12713	0.014619	8.6963	3.4297e-18
6:109799923	C	T	rs6911838	ZBTB24	intron_variant	[null]	NA	NA	NA	NA	NA	0.33937	221966	654048	0.99751	-0.12617	0.015522	-8.1284	4.3516e-16
7:149424769	T	C	rs57003278	KRBA1	intron_variant	[null]	NA	NA	NA	NA	NA	0.1789	117010	654048	0.99382	-0.15849	0.019652	-8.065	7.3242e-16
12:54685880	C	T	rs35979828	RP11-968A15.8	intron_variant	[null]	NA	NA	NA	NA	NA	0.068467	44781	654048	1	0.21496	0.02678	8.0267	1.0012e-15
11:108149207	T	G	rs141379009	ATM	intron_variant	[null]	NA	NA	NA	NA	NA	0.026877	17579	654048	0.99937	0.31968	0.040007	7.9905	1.3443e-15
18:42231958	A	G	rs2852752	NA	regulatory_region_variant	[null]	NA	NA	NA	NA	NA	0.67279	440039	654048	0.9991	-0.11999	0.015232	-7.8777	3.3349e-15
2:136925439	T	C	rs10193587	NA	intergenic_variant	[null]	NA	NA	NA	NA	NA	0.22982	150311	654046	0.98164	0.12518	0.016759	7.4697	8.0394e-14
17:47780716	A	G	rs200689359	SLC35B1	intron_variant	[null]	NA	NA	NA	NA	NA	0.041318	27024	654046	0.92924	-0.29829	0.040168	-7.426	1.119e-13
6:109578530	G	A	rs4946952	C6orf183	intron_variant	[null]	NA	NA	NA	NA	NA	0.80284	525096	654048	0.99904	-0.128	0.017663	-7.2465	4.2781e-13
5:1287194	G	A	rs2853677	TERT	intron_variant	[null]	NA	NA	NA	NA	NA	0.57791	377984	654048	1	-0.10393	0.01457	-7.133	9.8214e-13
6:42037628	C	G	rs12194781	TAF8	intron_variant	[null]	NA	NA	NA	NA	NA	0.12912	84451	654038	0.96207	-0.16052	0.022598	-7.103	1.2205e-12
5:111061881	C	T	rs57201028	STARD4-AS1	intron_variant	[null]	NA	NA	NA	NA	NA	0.074409	48667	654048	0.99668	0.18478	0.026138	7.0695	1.5554e-12
2:68962137	G	A	rs10048745	ARHGAP25	5_prime_UTR_variant	[null]	NA	NA	NA	NA	NA	0.25467	166566	654046	0.97371	0.11487	0.016302	7.0464	1.8366e-12
6:41986273	A	C	rs4714550	RNU6-761P	upstream_gene_variant	[null]	NA	NA	NA	NA	NA	0.75492	493754	654048	0.99602	0.12001	0.017241	6.9609	3.3809e-12
20:29428748	T	G	rs11905279	NA	intergenic_variant	[null]	NA	NA	NA	NA	NA	0.17013	111243	653854	0.86468	-0.13658	0.01992	-6.856	7.0792e-12
14:96162418	G	A	rs78986913	TCL1B	downstream_gene_variant	[null]	NA	NA	NA	NA	NA	0.04304	28150	654048	1	-0.26843	0.039204	-6.8469	7.5462e-12
5:169015479	G	A	rs116483731	SPDL1	missense_variant	[null]	["T"]	NA	benign	tolerated	ENSP00000265295.4:p.Arg20Gln	0.0082517	5397	654048	1	-0.71044	0.10578	-6.7164	1.8621e-11
12:26589770	G	A	rs16930705	ITPR2	intron_variant	[null]	NA	NA	NA	NA	NA	0.069747	45618	654048	0.99571	0.17907	0.026858	6.6675	2.6016e-11
7:135312572	G	A	rs4073627	NUP205	intron_variant	[null]	NA	NA	NA	NA	NA	0.13203	86355	654048	0.9994	-0.14786	0.022185	-6.6648	2.6503e-11
3:48638801	C	T	rs62618742	UQCRC1	missense_variant	[null]	["T"]	NA	probably_damaging	tolerated	ENSP00000203407.5:p.Arg269His	0.031389	20530	654048	0.93919	-0.30293	0.04569	-6.63	3.3559e-11
3:114574027	G	T	rs12695310	ZBTB20	intron_variant	[null]	NA	NA	NA	NA	NA	0.53278	348459	654040	0.98951	-0.091174	0.014483	-6.2951	3.0721e-10
16:81049800	T	C	rs12928638	CENPN	intron_variant	[null]	NA	NA	NA	NA	NA	0.13032	85238	654048	0.99684	0.13026	0.02081	6.2594	3.8652e-10
18:42252408	C	T	rs138775024	RP11-456K23.1	downstream_gene_variant	[null]	NA	NA	NA	NA	NA	0.038997	25506	654048	1	0.21947	0.035101	6.2526	4.0364e-10
12:52306687	C	G	rs35960167	ACVRL1	intron_variant	[null]	NA	NA	NA	NA	NA	0.44761	292758	654046	0.98884	0.089943	0.014518	6.1953	5.8187e-10
14:96153765	C	T	rs56111147	TCL1B	intron_variant	[null]	NA	NA	NA	NA	NA	0.47339	309620	654048	0.98456	-0.089339	0.014537	-6.1457	7.9603e-10
12:6493351	A	G	rs10849448	LTBR	5_prime_UTR_variant	[null]	NA	NA	NA	NA	NA	0.75284	492380	654032	0.95725	0.10503	0.017147	6.125	9.0677e-10
3:47087837	T	A	rs13063578	SETD2	intron_variant	[null,null]	NA	NA	NA	NA	NA	0.39899	260956	654048	0.99652	0.089683	0.01471	6.0968	1.082e-09
6:109596552	C	T	rs72940976	C6orf183	downstream_gene_variant	[null]	NA	NA	NA	NA	NA	0.063278	41387	654048	0.92748	-0.19075	0.031515	-6.0526	1.4251e-09
1:111208718	A	T	rs56795609	NA	intergenic_variant	[null]	NA	NA	NA	NA	NA	0.17435	114033	654046	0.9873	-0.11835	0.01962	-6.0321	1.6185e-09
1:198750522	G	A	rs10800586	NA	intergenic_variant	[null]	NA	NA	NA	NA	NA	0.56751	371179	654048	0.99091	-0.087482	0.014549	-6.013	1.8212e-09
12:14595456	G	A	rs7299037	ATF7IP	intron_variant	[null]	NA	NA	NA	NA	NA	0.5071	331669	654048	0.99365	0.087045	0.014483	6.0103	1.8521e-09
4:55408875	A	T	rs218264	NA	regulatory_region_variant	[null]	NA	NA	NA	NA	NA	0.24869	162655	654048	0.98089	-0.10174	0.017028	-5.9752	2.2985e-09
14:101191007	A	T	rs67022228	DLK1	upstream_gene_variant	[null]	NA	NA	NA	NA	NA	0.27152	177588	654042	0.96358	-0.098323	0.016573	-5.9326	2.9816e-09
3:168860010	G	A	rs2859868	MECOM	intron_variant	[null]	NA	NA	NA	NA	NA	0.55023	359875	654044	0.98647	-0.085627	0.014516	-5.8989	3.6584e-09
18:42041131	T	G	rs72899729	CTC-782O7.1	intron_variant	[null]	NA	NA	NA	NA	NA	0.013325	8715	654048	0.93316	0.329	0.056057	5.8691	4.3824e-09
1:44937451	G	A	rs11211005	RNF220	intron_variant	[null]	NA	NA	NA	NA	NA	0.21588	141196	654048	0.99195	-0.10396	0.017998	-5.7763	7.6378e-09
2:16627651	A	T	rs7580707	NA	intergenic_variant	[null]	NA	NA	NA	NA	NA	0.73523	480876	654046	0.98792	-0.093179	0.016145	-5.7714	7.8624e-09
7:27143757	T	C	rs2522828	HOXA2	upstream_gene_variant	[null]	NA	NA	NA	NA	NA	0.91321	597286	654048	1	-0.14194	0.024626	-5.764	8.216e-09
4:103475444	G	T	rs4648011	NFKB1	intron_variant	[null]	NA	NA	NA	NA	NA	0.58224	380812	654048	0.98919	0.083743	0.014747	5.6788	1.3565e-08
3:150238789	A	G	rs4390958	NA	intergenic_variant	[null]	NA	NA	NA	NA	NA	0.63829	417474	654048	0.98583	-0.084233	0.01493	-5.6417	1.6838e-08
2:58936057	A	T	rs10865307	LINC01122	intron_variant	[null]	NA	NA	NA	NA	NA	0.57757	377760	654046	0.99054	0.082921	0.014717	5.6342	1.7588e-08
3:128336298	G	T	rs2492286	RPN1	downstream_gene_variant	[null]	NA	NA	NA	NA	NA	0.15401	100731	654048	0.99089	-0.11659	0.020723	-5.6263	1.8416e-08
17:76684970	G	A	rs7225707	CYTH1	intron_variant	[null]	NA	NA	NA	NA	NA	0.55251	361369	654048	0.99663	0.081799	0.014582	5.6097	2.0269e-08
3:150255127	C	T	rs79022866	SERP1	downstream_gene_variant	[null]	NA	NA	NA	NA	NA	0.064417	42132	654048	0.98146	0.15553	0.027946	5.5654	2.615e-08
7:50338499	G	A	rs1993444	NA	intergenic_variant	[null]	NA	NA	NA	NA	NA	0.33403	218470	654048	0.99851	-0.086276	0.015523	-5.558	2.7291e-08
11:24084913	C	T	rs72881160	NA	intergenic_variant	[null]	NA	NA	NA	NA	NA	0.13161	86078	654024	0.88797	0.11454	0.020716	5.529	3.2205e-08
8:30251002	C	A	rs2979484	RBPMS	intron_variant	[null]	NA	NA	NA	NA	NA	0.2852	186532	654032	0.97085	0.087489	0.01583	5.5269	3.2598e-08
3:150021924	A	T	rs28582771	NA	regulatory_region_variant	[null]	NA	NA	NA	NA	NA	0.30073	196690	654048	0.99684	-0.088149	0.015999	-5.5097	3.5949e-08
8:30631471	C	T	rs113406715	PPP2CB	downstream_gene_variant	[null]	NA	NA	NA	NA	NA	0.02515	16449	654048	1	0.23003	0.042176	5.454	4.9245e-08

## Sheet: S.Data4
Supplementary Data 4: Transcriptome-wide association using GTEXv8-whole blood (N=670)
gene	gene_name.y	gene_type	zscore	effect_size	pvalue	n_snps_used	n_snps_in_cov	n_snps_in_model	chr	start	end
ENSG00000135535.15	CD164	protein_coding	10.3322	2.6615	5.04085e-25	13	13	138	chr6	109366514	109382457
ENSG00000112365.4	ZBTB24	protein_coding	10.2269	3.33501	1.50198e-24	8	10	85	chr6	109462594	109483237
ENSG00000135537.16	LACE1	protein_coding	-9.12514	-81.2965	7.16447e-20	1	1	74	chr6	108294894	108526796
ENSG00000135587.8	SMPD2	protein_coding	8.31912	0.458439	8.86164e-17	20	23	215	chr6	109440763	109443919
ENSG00000166323.12	C11orf65	protein_coding	7.94828	70.4547	1.8912e-15	1	1	155	chr11	108308519	108467531
ENSG00000149311.18	ATM	protein_coding	7.94056	1.14437	2.0127e-15	12	12	147	chr11	108222484	108369102
ENSG00000155085.15	AK9	protein_coding	-7.44372	-0.789379	9.78906e-14	15	15	285	chr6	109492856	109691217
ENSG00000075239.13	ACAT1	protein_coding	7.28203	1.89005	3.28834e-13	21	21	217	chr11	108121516	108147776
ENSG00000138468.15	SENP7	protein_coding	-7.22199	-0.749463	5.12327e-13	25	25	205	chr3	101324205	101513241
ENSG00000135596.17	MICAL1	protein_coding	7.04905	109.043	1.8015e-12	1	1	168	chr6	109444062	109465968
ENSG00000101331.15	CCM2L	protein_coding	-6.62367	-4.41444	3.50391e-11	11	11	405	chr20	32010450	32032180
ENSG00000002822.15	MAD1L1	protein_coding	6.39849	2.12582	1.56921e-10	14	14	180	chr7	1815793	2233243
ENSG00000203799.12	CCDC162P	transcribed_unitary_pseudogene	6.06968	0.399299	1.28165e-09	20	20	407	chr6	109165831	109355063
ENSG00000122687.17	MRM2	protein_coding	-5.54859	-1.36891	2.87985e-08	11	11	355	chr7	2234231	2242198
ENSG00000101306.10	MYLK2	protein_coding	5.24257	1.5073	1.58352e-07	9	9	181	chr20	31819308	31834689
ENSG00000122877.15	EGR2	protein_coding	5.12237	801.417	3.0172e-07	1	1	60	chr10	62811996	62919900
ENSG00000171988.18	JMJD1C	protein_coding	-5.09186	-143.964	3.5457e-07	1	1	96	chr10	63167221	63521850
ENSG00000154175.16	ABI3BP	protein_coding	-5.04268	-3.66169	4.5906e-07	8	8	124	chr3	100749156	100993515
ENSG00000112367.10	FIG4	protein_coding	-4.96002	-3.17215	7.04872e-07	14	14	164	chr6	109691312	109825428
ENSG00000055483.19	USP36	protein_coding	4.88204	1.75962	1.04996e-06	4	5	212	chr17	78787381	78841441
ENSG00000244313.3	RP11-425L10.1	processed_pseudogene	-4.86667	-49.307	1.13494e-06	2	2	66	chr11	46428653	46429150
ENSG00000108669.16	CYTH1	protein_coding	-4.8449	-20.9327	1.26678e-06	4	4	198	chr17	78674048	78782297
ENSG00000088727.12	KIF9	protein_coding	4.80963	1.73525	1.51209e-06	7	7	70	chr3	47228026	47283451
ENSG00000165476.13	REEP3	protein_coding	-4.73146	-12.347	2.22912e-06	2	2	163	chr10	63521363	63625123
ENSG00000183150.7	GPR19	protein_coding	4.57787	2.26423	4.69727e-06	30	32	591	chr12	12660891	12696207
ENSG00000181722.16	ZBTB20	protein_coding	4.54582	7.35097	5.47216e-06	7	7	113	chr3	114314501	115147271
ENSG00000139572.3	GPR84	protein_coding	4.5127	2.07606	6.40079e-06	1	1	446	chr12	54362445	54364487
ENSG00000186049.8	KRT73	protein_coding	-4.50448	-181.753	6.65369e-06	2	2	168	chr12	52607570	52618559
ENSG00000137337.14	MDC1	protein_coding	-4.48282	-4.80674	7.36642e-06	28	29	243	chr6	30699807	30717889
ENSG00000125968.8	ID1	protein_coding	-4.45422	-31.607	8.4199e-06	3	3	78	chr20	31605283	31606515
ENSG00000155393.12	HEATR3	protein_coding	-4.41013	-0.250564	1.0331e-05	2	2	352	chr16	50065941	50106387
ENSG00000114650.18	SCAP	protein_coding	-4.38766	-1.33433	1.14577e-05	7	7	211	chr3	47413694	47477126
ENSG00000051382.8	PIK3CB	protein_coding	-4.34555	-7.67041	1.38929e-05	2	2	82	chr3	138652699	138834938
ENSG00000118690.12	ARMC2	protein_coding	-4.27445	-3.00979	1.9161e-05	2	2	221	chr6	108848416	108974472
ENSG00000214237.10	MINDY4B	protein_coding	-4.24107	-30.2012	2.22459e-05	5	5	178	chr3	150871045	150905439
ENSG00000160767.20	FAM189B	protein_coding	4.17979	3.09696	2.91775e-05	11	11	96	chr1	155247205	155255483
ENSG00000163832.15	ELP6	protein_coding	4.17606	6.55428	2.966e-05	1	1	131	chr3	47495640	47513761
ENSG00000033327.12	GAB2	protein_coding	-4.14987	-2.08523	3.32658e-05	13	14	196	chr11	78215297	78418348
ENSG00000160799.11	CCDC12	protein_coding	-4.11778	-4.58369	3.82541e-05	7	7	125	chr3	46921726	46982010
ENSG00000100024.14	UPB1	protein_coding	-4.07996	-0.348921	4.50428e-05	17	19	625	chr22	24494107	24528390
ENSG00000122025.14	FLT3	protein_coding	4.07697	2.2206	4.56271e-05	24	26	543	chr13	28003274	28100592
ENSG00000160796.16	NBEAL2	protein_coding	4.04921	1.52975	5.13908e-05	12	12	212	chr3	46979683	47009703
ENSG00000226239.1	RP1-310O13.7	antisense	-4.03517	-1.69687	5.45638e-05	23	23	427	chr20	32027753	32031575
ENSG00000171681.12	ATF7IP	protein_coding	4.02815	1.87988	5.62179e-05	8	9	102	chr12	14365632	14502935
ENSG00000048991.16	R3HDM1	protein_coding	-4.02726	-56.3999	5.64295e-05	5	5	48	chr2	135531455	135725270
ENSG00000074621.13	SLC24A1	protein_coding	-4.00068	-6.62118	6.31605e-05	3	3	59	chr15	65611378	65660995
ENSG00000109320.11	NFKB1	protein_coding	3.98889	2.36634	6.63827e-05	6	6	107	chr4	102501329	102617302
ENSG00000116497.17	S100PBP	protein_coding	3.9827	0.387308	6.81364e-05	4	4	82	chr1	32816767	32858879
ENSG00000171311.12	EXOSC1	protein_coding	3.96074	2.69479	7.47182e-05	11	11	105	chr10	97436142	97446017
ENSG00000154781.15	CCDC174	protein_coding	-3.95533	-48.8837	7.6429e-05	1	1	200	chr3	14651746	14672659
ENSG00000158234.12	FAIM	protein_coding	-3.94007	-4.78344	8.14585e-05	6	6	128	chr3	138608609	138633376
ENSG00000230037.1	UBBP1	processed_pseudogene	3.91585	38.9097	9.00848e-05	4	4	81	chr2	136329441	136329913
ENSG00000227398.3	KIF9-AS1	antisense	3.89341	286.309	9.8844e-05	1	1	52	chr3	47164497	47246601
ENSG00000162664.16	ZNF326	protein_coding	-3.88132	-4.57139	0.00010389	7	7	50	chr1	89995112	90035531
ENSG00000217644.5	RP4-803A2.1	processed_pseudogene	3.87697	4.13183	0.000105765	3	3	151	chr1	32979947	32980472
ENSG00000103121.8	CMC2	protein_coding	-3.86515	-10.819	0.000111021	2	2	129	chr16	80966448	81020270
ENSG00000167208.14	SNX20	protein_coding	3.86113	8.35228	0.000112864	16	16	489	chr16	50666300	50681353
ENSG00000066422.4	ZBTB11	protein_coding	3.81815	9.35689	0.000134458	7	7	103	chr3	101648889	101677495
ENSG00000160179.18	ABCG1	protein_coding	-3.81516	-1.77408	0.000136097	11	11	89	chr21	42199689	42297244
ENSG00000176261.15	ZBTB8OS	protein_coding	3.7907	4.35325	0.000150224	8	8	84	chr1	32600172	32650903
ENSG00000162367.11	TAL1	protein_coding	-3.74675	-3.46804	0.00017914	1	1	506	chr1	47216290	47232220
ENSG00000141744.3	PNMT	protein_coding	-3.74197	-1.46115	0.00018258	10	11	391	chr17	39667981	39670475
ENSG00000137513.9	NARS2	protein_coding	3.70376	0.506086	0.000212428	28	28	336	chr11	78435961	78574874
ENSG00000197375.12	SLC22A5	protein_coding	-3.6991	-0.183195	0.000216366	6	6	192	chr5	132369752	132395614
ENSG00000054219.10	LY75	protein_coding	-3.69353	-0.228046	0.00022116	7	7	309	chr2	159803355	159904749
ENSG00000146215.13	CRIP3	protein_coding	-3.68986	-3.84594	0.00022438	5	6	526	chr6	43299710	43308797
ENSG00000197093.10	GAL3ST4	protein_coding	3.68251	2.05619	0.000230946	9	9	115	chr7	100159244	100168750
ENSG00000072310.16	SREBF1	protein_coding	3.67739	0.602802	0.000235635	3	3	93	chr17	17810399	17837002
ENSG00000241511.1	RPS15AP24	processed_pseudogene	-3.67681	-1.5336	0.000236172	37	40	418	chr8	30117384	30117779
ENSG00000011105.12	TSPAN9	protein_coding	3.65747	2.5007	0.00025472	16	18	212	chr12	3077355	3286564
ENSG00000180210.14	F2	protein_coding	3.64126	1.60539	0.000271307	13	13	337	chr11	46719180	46739506
ENSG00000229453.2	SPINK8	protein_coding	3.62694	0.935129	0.000286796	3	3	148	chr3	48306842	48328341
ENSG00000129595.12	EPB41L4A	protein_coding	3.62518	0.739633	0.000288758	24	24	323	chr5	112142441	112419316
ENSG00000141499.16	WRAP53	protein_coding	3.62008	3.592	0.000294508	5	5	45	chr17	7686071	7703502
ENSG00000161395.13	PGAP3	protein_coding	-3.61691	-1.07665	0.000298142	17	17	217	chr17	39671122	39696797
ENSG00000146414.15	SHPRH	protein_coding	3.60761	1.41625	0.000309025	9	9	99	chr6	145864245	145964423
ENSG00000239265.5	CLRN1-AS1	antisense	-3.59497	-4.77065	0.000324426	11	11	248	chr3	150852484	151080726
ENSG00000149294.16	NCAM1	protein_coding	-3.59222	-4.4775	0.000327878	9	9	126	chr11	112961247	113278436
ENSG00000185811.16	IKZF1	protein_coding	-3.58464	-7.33556	0.000337545	8	8	574	chr7	50304124	50405101
ENSG00000169375.15	SIN3A	protein_coding	3.57485	12.5126	0.000350435	4	4	65	chr15	75369379	75455842
ENSG00000226252.1	RP1-18D14.7	antisense	-3.56938	-12.079	0.000357832	3	3	499	chr1	47225797	47230750
ENSG00000110536.13	PTPMT1	protein_coding	-3.55324	-2.18927	0.000380516	10	10	135	chr11	47565430	47573461
ENSG00000125084.11	WNT1	protein_coding	-3.53956	-8.64662	0.000400801	6	6	320	chr12	48978453	48981676
ENSG00000187726.8	DNAJB13	protein_coding	3.52319	2.15905	0.00042638	1	1	452	chr11	73950319	73970366
ENSG00000035928.15	RFC1	protein_coding	-3.52101	-3.06789	0.000429911	2	2	86	chr4	39287456	39366375
ENSG00000114107.8	CEP70	protein_coding	-3.51753	-44.4255	0.00043558	1	1	162	chr3	138494344	138594538
ENSG00000230084.5	RP4-613B23.1	antisense	-3.50079	-0.58659	0.000463881	23	23	474	chr3	42601963	42654388
ENSG00000115325.13	DOK1	protein_coding	-3.49725	-188.1	0.000470082	2	2	54	chr2	74549026	74557554
ENSG00000064547.13	LPAR2	protein_coding	3.48817	1.53653	0.000486339	2	2	224	chr19	19623668	19628930
ENSG00000175224.16	ATG13	protein_coding	3.48733	3.32234	0.000487877	3	3	138	chr11	46617527	46674818
ENSG00000169609.13	C15orf40	protein_coding	-3.48696	-0.880349	0.000488552	10	10	329	chr15	82988441	83011641
ENSG00000103942.12	HOMER2	protein_coding	-3.4833	-0.953436	0.000495279	11	12	137	chr15	82836946	82986153
ENSG00000092051.16	JPH4	protein_coding	-3.47639	-3.61791	0.000508204	15	17	92	chr14	23568035	23578800
ENSG00000164089.8	ETNPPL	protein_coding	3.47587	1.65966	0.000509207	28	28	482	chr4	108742040	108763054
ENSG00000108924.13	HLF	protein_coding	-3.47104	-8.39149	0.00051845	4	5	126	chr17	55265012	55325065
ENSG00000163481.7	RNF25	protein_coding	3.45891	5.5744	0.000542366	8	9	114	chr2	218663864	218672411
ENSG00000112667.12	DNPH1	protein_coding	-3.45777	-1.58	0.000544659	29	30	293	chr6	43225629	43229484
ENSG00000236409.1	NRADDP	unitary_pseudogene	3.45156	108.154	0.000557359	3	3	381	chr3	47011542	47013146
ENSG00000096996.15	IL12RB1	protein_coding	-3.44395	-0.805088	0.00057328	1	1	510	chr19	18058995	18098944
ENSG00000189223.14	PAX8-AS1	processed_transcript	3.43719	0.114857	0.000587791	23	24	385	chr2	113211522	113276581
ENSG00000144802.11	NFKBIZ	protein_coding	-3.43682	-3.07598	0.000588595	9	9	102	chr3	101827991	101861022
ENSG00000164941.13	INTS8	protein_coding	3.43518	2.41975	0.000592152	13	13	256	chr8	94813311	94881746
ENSG00000162520.14	SYNC	protein_coding	3.42898	2.48422	0.000605849	17	18	363	chr1	32680360	32703596
ENSG00000110660.14	SLC35F2	protein_coding	3.4272	0.873151	0.000609847	17	17	238	chr11	107790991	107928293
ENSG00000138867.16	GUCD1	protein_coding	-3.42509	-4.94445	0.000614594	11	12	119	chr22	24540423	24555935
ENSG00000150961.14	SEC24D	protein_coding	-3.41594	-9.6133	0.000635614	7	7	148	chr4	118722823	118838683
ENSG00000140262.17	TCF12	protein_coding	-3.41417	-2.37295	0.000639776	9	9	141	chr15	56918623	57299281
ENSG00000168038.10	ULK4	protein_coding	3.41033	0.175943	0.000648844	4	4	406	chr3	41246599	41962430
ENSG00000115866.10	DARS	protein_coding	-3.39216	-10.3963	0.00069345	2	2	79	chr2	135906677	135986100
ENSG00000197646.7	PDCD1LG2	protein_coding	-3.39183	-12.1645	0.00069428	1	2	242	chr9	5510570	5571254
ENSG00000177590.7	GIMAP3P	processed_pseudogene	-3.3888	-19.5285	0.000701986	2	3	117	chr7	150746893	150747728
ENSG00000074706.13	IPCEF1	protein_coding	-3.3878	-1.71283	0.000704562	51	56	653	chr6	154154496	154356792
ENSG00000114268.11	PFKFB4	protein_coding	3.38362	7.7516	0.000715359	4	4	80	chr3	48517684	48562015
ENSG00000023839.10	ABCC2	protein_coding	-3.37992	-1.11779	0.00072508	9	9	115	chr10	99782732	99852192
ENSG00000224424.7	PRKAR2A-AS1	antisense	-3.37276	-126.606	0.000744186	3	3	53	chr3	48847572	48851981
ENSG00000245148.2	ARAP1-AS2	antisense	-3.36731	-19.9492	0.000759048	3	3	122	chr11	72700474	72705607
ENSG00000112977.15	DAP	protein_coding	3.36131	0.227022	0.000775743	20	22	270	chr5	10679230	10761272
ENSG00000104611.11	SH2D4A	protein_coding	3.35707	1.05529	0.000787729	20	20	173	chr8	19313617	19396218
ENSG00000120616.15	EPC1	protein_coding	-3.35323	-7.31906	0.00079874	9	9	126	chr10	32267751	32378798
ENSG00000144021.2	CIAO1	protein_coding	-3.35192	-0.289696	0.000802546	8	8	235	chr2	96266132	96271645
ENSG00000227939.1	RPL3P2	processed_pseudogene	-3.34793	-6.24848	0.000814184	4	4	85	chr6	31280317	31281519
ENSG00000091972.18	CD200	protein_coding	3.34019	5.28057	0.000837221	5	6	82	chr3	112332347	112362812
ENSG00000179988.13	PSTK	protein_coding	-3.3324	-5.18512	0.00086099	2	2	111	chr10	122954381	122997513
ENSG00000165916.8	PSMC3	protein_coding	3.31526	1.47179	0.000915572	7	7	204	chr11	47418769	47426473
ENSG00000119929.12	CUTC	protein_coding	3.31199	9.21684	0.000926337	4	4	78	chr10	99702558	99756134
ENSG00000181938.13	GINS3	protein_coding	-3.31167	-2.61713	0.000927417	11	12	116	chr16	58295080	58406144
ENSG00000197536.11	C5orf56	protein_coding	3.30664	1.39529	0.000944234	16	16	181	chr5	132410636	132488702
ENSG00000076201.14	PTPN23	protein_coding	3.30564	67.8039	0.00094759	1	1	94	chr3	47381011	47413441
ENSG00000156232.7	WHAMM	protein_coding	-3.30406	-1.3532	0.000952962	4	4	130	chr15	82809628	82836108
ENSG00000250031.1	RP11-114M5.1	processed_pseudogene	3.30311	3.01009	0.000956172	29	29	416	chr8	58424588	58426685
ENSG00000229473.2	RGS17P1	processed_pseudogene	-3.30105	-3.91045	0.00096323	1	1	347	chr13	40992779	40993331
ENSG00000116478.11	HDAC1	protein_coding	-3.28911	-11.8659	0.00100505	3	3	80	chr1	32292086	32333635
ENSG00000189171.14	S100A13	protein_coding	3.28209	0.307943	0.0010304	1	1	205	chr1	153618787	153631360
ENSG00000154380.17	ENAH	protein_coding	3.26882	3.40615	0.00107998	7	7	491	chr1	225486835	225653142
ENSG00000234290.2	AC116366.6	antisense	3.26762	0.828955	0.00108456	11	11	85	chr5	132468890	132473043
ENSG00000175155.8	YPEL2	protein_coding	3.2662	4.77581	0.00109001	3	3	97	chr17	59331689	59401729
ENSG00000008300.16	CELSR3	protein_coding	3.26172	14.133	0.0011074	1	1	49	chr3	48636469	48662915
ENSG00000105705.15	SUGP1	protein_coding	3.25704	456.53	0.0011258	1	1	141	chr19	19276018	19320844
ENSG00000172965.14	MIR4435-2HG	lincRNA	-3.25441	-0.999807	0.0011363	14	14	205	chr2	111196350	111495100
ENSG00000144028.14	SNRNP200	protein_coding	3.25352	7.15705	0.00113986	5	6	114	chr2	96274336	96305515
ENSG00000163472.18	TMEM79	protein_coding	-3.23943	-1.37317	0.0011977	1	1	99	chr1	156282935	156293185
ENSG00000165917.9	RAPSN	protein_coding	-3.23555	-1.27831	0.00121407	6	6	115	chr11	47437757	47449178
ENSG00000103569.9	AQP9	protein_coding	3.23235	26.8449	0.00122776	6	6	55	chr15	58138169	58185911
ENSG00000104812.14	GYS1	protein_coding	3.22304	5.69073	0.00126836	9	9	108	chr19	48968125	48993310
ENSG00000163126.14	ANKRD23	protein_coding	3.21795	3.92189	0.00129112	6	6	81	chr2	96824526	96857934
ENSG00000112425.14	EPM2A	protein_coding	3.21782	0.344371	0.00129168	10	10	151	chr6	145382535	145736023
ENSG00000178093.13	TSSK6	protein_coding	-3.21659	-1.39131	0.00129722	2	2	151	chr19	19512418	19515685
ENSG00000198715.11	GLMP	protein_coding	-3.20258	-0.115028	0.00136202	3	3	155	chr1	156290089	156295689
ENSG00000117523.15	PRRC2C	protein_coding	3.20035	5.8134	0.0013726	6	7	104	chr1	171485551	171593511
ENSG00000163412.12	EIF4E3	protein_coding	-3.18773	-2.79316	0.00143393	7	7	129	chr3	71675416	71754773
ENSG00000078399.17	HOXA9	protein_coding	3.17828	1.38178	0.00148149	12	12	335	chr7	27162435	27175180
ENSG00000123999.4	INHA	protein_coding	-3.17664	-3.38818	0.0014899	1	1	512	chr2	219569162	219575713
ENSG00000110492.15	MDK	protein_coding	-3.17115	-2.71368	0.00151834	7	7	126	chr11	46380756	46383837
ENSG00000110628.13	SLC22A18	protein_coding	3.16361	0.177172	0.00155828	16	17	342	chr11	2899721	2925246
ENSG00000163468.14	CCT3	protein_coding	-3.16042	-1.48175	0.00157545	7	7	179	chr1	156308968	156367873
ENSG00000175662.17	TOM1L2	protein_coding	3.15216	0.910418	0.00162068	4	4	181	chr17	17843511	17972422
ENSG00000120742.10	SERP1	protein_coding	-3.14919	-5.90607	0.00163724	11	11	138	chr3	150541994	150603228
ENSG00000138796.16	HADH	protein_coding	3.14284	13.3878	0.00167319	4	4	82	chr4	107989714	108035175
ENSG00000112232.8	KHDRBS2	protein_coding	3.13539	0.800208	0.00171625	18	21	700	chr6	61679960	62286227
ENSG00000078687.17	TNRC6C	protein_coding	3.13228	1.3983	0.00173455	13	13	91	chr17	77959240	78108835
ENSG00000109180.14	OCIAD1	protein_coding	3.13033	1.3616	0.00174607	5	6	217	chr4	48805212	48861817
ENSG00000124574.14	ABCC10	protein_coding	3.1274	4.23862	0.0017636	9	9	88	chr6	43427366	43450430
ENSG00000213609.3	RPL7AP50	processed_pseudogene	3.12209	9.55586	0.00179574	4	4	66	chr10	63902451	63903245
ENSG00000245322.6	RP11-15B17.1	antisense	-3.12106	-1.81238	0.00180203	10	10	154	chr4	99950006	100195099
ENSG00000105647.16	PIK3R2	protein_coding	-3.11718	-14.2596	0.00182593	6	6	85	chr19	18153118	18170540
ENSG00000214796.8	RP11-480I12.5	transcribed_unprocessed_pseudogene	3.11717	1.81472	0.00182598	22	23	427	chr1	202851828	202861620
ENSG00000156639.11	ZFAND3	protein_coding	-3.10342	-4.59834	0.001913	9	9	92	chr6	37819499	38154624
ENSG00000141741.11	MIEN1	protein_coding	3.1033	5.12924	0.00191374	5	5	71	chr17	39729156	39730787
ENSG00000103485.17	QPRT	protein_coding	-3.10072	-8.6237	0.00193052	6	6	99	chr16	29679008	29698699
ENSG00000104731.13	KLHDC4	protein_coding	-3.09729	-0.860748	0.001953	2	2	372	chr16	87696485	87765992
ENSG00000246790.2	RP11-730K11.1	antisense	3.09484	3.05824	0.00196918	4	4	163	chr11	121447331	121453013
ENSG00000183018.8	SPNS2	protein_coding	3.09227	2.37158	0.0019863	1	1	118	chr17	4498838	4539035
ENSG00000151576.10	QTRT2	protein_coding	-3.08802	-8.86255	0.00201495	8	8	84	chr3	114005833	114088422
ENSG00000176268.5	CYCSP34	processed_pseudogene	-3.08296	-0.503313	0.00204951	18	18	285	chr13	40863599	40863902
ENSG00000129933.20	MAU2	protein_coding	3.082	1.188	0.00205612	9	9	107	chr19	19320681	19358755
ENSG00000168016.13	TRANK1	protein_coding	3.07317	5.46921	0.00211797	7	7	152	chr3	36826820	36945057
ENSG00000143222.11	UFC1	protein_coding	-3.06668	-4.85424	0.00216448	13	13	141	chr1	161152776	161158856
ENSG00000108641.14	B9D1	protein_coding	-3.06592	-2.23462	0.00217004	3	3	78	chr17	19337554	19378182
ENSG00000101442.9	ACTR5	protein_coding	3.06381	2.24224	0.0021854	12	12	129	chr20	38748442	38772520
ENSG00000165915.13	SLC39A13	protein_coding	3.06361	1.54063	0.00218682	4	4	169	chr11	47407132	47416501
ENSG00000171962.17	DRC3	protein_coding	-3.04832	-1.48926	0.00230127	2	2	178	chr17	17972813	18016889
ENSG00000106266.10	SNX8	protein_coding	-3.04465	-3.86721	0.00232953	15	15	212	chr7	2251770	2354318
ENSG00000117620.14	SLC35A3	protein_coding	3.04264	4.10688	0.00234514	11	11	131	chr1	99969351	100035637
ENSG00000102967.11	DHODH	protein_coding	3.03855	0.961068	0.0023772	20	20	244	chr16	72008588	72027664
ENSG00000160783.19	PMF1	protein_coding	3.02807	49.8242	0.0024612	1	1	88	chr1	156212993	156240042
ENSG00000230970.3	HHATL-AS1	antisense	-3.02439	-0.790841	0.00249133	15	15	385	chr3	42702653	42706776
ENSG00000149599.15	DUSP15	protein_coding	-3.02266	-1.27289	0.0025056	21	21	377	chr20	31847637	31870747
ENSG00000108406.9	DHX40	protein_coding	-3.02024	-3.66396	0.00252575	5	5	88	chr17	59565525	59608345
ENSG00000136144.11	RCBTB1	protein_coding	-3.0186	-0.21957	0.00253944	17	17	265	chr13	49531946	49585583
ENSG00000125970.11	RALY	protein_coding	-3.01838	-3.72355	0.00254132	6	6	56	chr20	33993646	34108308
ENSG00000226360.5	RPL10AP6	processed_pseudogene	3.01146	6.2829	0.00259996	3	3	42	chr3	61742455	61743106
ENSG00000102878.16	HSF4	protein_coding	3.00765	11.5763	0.0026328	7	7	74	chr16	67164743	67169945
ENSG00000205611.4	LINC01597	lincRNA	-3.00486	-4.05833	0.00265705	2	2	497	chr20	30278906	30288479
ENSG00000088305.18	DNMT3B	protein_coding	-3.00161	-1.31719	0.00268558	9	9	136	chr20	32762385	32809356
ENSG00000121900.18	TMEM54	protein_coding	-3.00106	-2.49205	0.00269037	5	5	106	chr1	32894594	32901438
ENSG00000136167.13	LCP1	protein_coding	2.9997	4.4219	0.00270245	6	6	80	chr13	46125920	46211871
ENSG00000129810.14	SGO1	protein_coding	-2.99496	-4.79839	0.00274484	16	16	390	chr3	20160593	20186292
ENSG00000125037.12	EMC3	protein_coding	2.99259	3.49231	0.00276624	14	14	127	chr3	9962537	10011116
ENSG00000249806.1	RP11-223C24.1	lincRNA	2.99064	0.217591	0.00278392	19	24	63	chr4	142566019	142660950
ENSG00000196428.12	TSC22D2	protein_coding	-2.99052	-4.47408	0.00278504	7	9	94	chr3	150408335	150466431
ENSG00000093183.13	SEC22C	protein_coding	2.98997	8.77582	0.00279001	3	3	163	chr3	42547969	42601080
ENSG00000259315.1	ACTG1P17	transcribed_processed_pseudogene	2.98458	17.4981	0.00283972	4	4	77	chr15	82725873	82738904
ENSG00000115286.19	NDUFS7	protein_coding	2.9834	3.37561	0.00285061	13	13	123	chr19	1383527	1395589
ENSG00000124370.10	MCEE	protein_coding	-2.98238	-54.8519	0.00286017	2	2	158	chr2	71109684	71130239
ENSG00000182257.6	PRR34	protein_coding	-2.96241	-2.00893	0.00305243	15	15	194	chr22	46049478	46054144
ENSG00000175305.17	CCNE2	protein_coding	2.949	3.33315	0.003188	1	1	107	chr8	94879770	94896678
ENSG00000156170.12	NDUFAF6	protein_coding	-2.949	-2.78527	0.003188	1	1	243	chr8	94895767	95116455
ENSG00000176083.17	ZNF683	protein_coding	-2.94715	-0.594811	0.00320713	26	27	344	chr1	26361634	26374522
ENSG00000106100.10	NOD1	protein_coding	2.94649	4.28031	0.00321402	2	2	146	chr7	30424527	30478784
ENSG00000256433.2	RP1-102E24.8	lincRNA	-2.94415	-0.663545	0.00323838	34	38	488	chr12	6393905	6396148
ENSG00000149531.15	FRG1BP	unprocessed_pseudogene	2.94169	3.67756	0.00326431	3	3	199	chr20	30377372	30399257
ENSG00000143751.9	SDE2	protein_coding	2.93532	6.50102	0.00333209	5	5	124	chr1	225982702	225999331
ENSG00000073584.18	SMARCE1	protein_coding	2.93134	1.15569	0.00337504	5	5	172	chr17	40624962	40648508
ENSG00000114854.7	TNNC1	protein_coding	2.92796	11.1411	0.00341194	2	3	43	chr3	52451102	52454070
ENSG00000170473.16	PYM1	protein_coding	2.92201	8.85498	0.00347777	5	5	63	chr12	55901413	55932618
ENSG00000138735.15	PDE5A	protein_coding	-2.91926	-4.45667	0.00350867	7	8	136	chr4	119494395	119628991
ENSG00000136169.16	SETDB2	protein_coding	-2.91823	-1.93647	0.0035202	1	1	180	chr13	49444374	49495003
ENSG00000008324.11	SS18L2	protein_coding	2.91823	2.15248	0.0035202	1	1	105	chr3	42581840	42595114
ENSG00000164695.4	CHMP4C	protein_coding	-2.91741	-0.599098	0.00352957	4	4	264	chr8	81732434	81759515
ENSG00000107362.13	ABHD17B	protein_coding	-2.91672	-4.92382	0.00353735	8	8	127	chr9	71862452	71910931
ENSG00000111276.10	CDKN1B	protein_coding	2.91322	3.06515	0.00357724	11	13	87	chr12	12715058	12722371
ENSG00000160781.15	PAQR6	protein_coding	-2.91155	-0.0976146	0.0035964	1	1	190	chr1	156243321	156248117
ENSG00000198952.8	SMG5	protein_coding	-2.91155	-0.103585	0.0035964	1	1	161	chr1	156249224	156282825
ENSG00000169683.7	LRRC45	protein_coding	2.91065	1.38207	0.00360673	5	5	240	chr17	82023302	82031151
ENSG00000166439.5	RNF169	protein_coding	-2.90884	-4.13814	0.0036277	1	1	86	chr11	74748868	74842413
ENSG00000228801.5	RP11-110G21.1	antisense	2.89726	7.23924	0.00376432	2	2	119	chr8	51899325	51947173
ENSG00000018408.14	WWTR1	protein_coding	2.88598	2.60131	0.00390193	8	8	101	chr3	149517235	149736714
ENSG00000172828.12	CES3	protein_coding	2.88331	12.4105	0.00393524	4	4	109	chr16	66961237	66975148
ENSG00000131504.15	DIAPH1	protein_coding	2.88257	8.67003	0.00394449	3	3	104	chr5	141515016	141619055
ENSG00000198911.11	SREBF2	protein_coding	2.88044	3.54527	0.00397124	14	14	106	chr22	41833079	41907308
ENSG00000114026.21	OGG1	protein_coding	2.87988	7.14532	0.00397829	2	2	128	chr3	9749944	9788219
ENSG00000114853.13	ZBTB47	protein_coding	2.87938	1.63075	0.00398462	6	6	100	chr3	42653684	42665854
ENSG00000144674.16	GOLGA4	protein_coding	2.87839	17.8457	0.00399706	3	3	155	chr3	37243177	37366751
ENSG00000106628.10	POLD2	protein_coding	-2.87783	-1.30003	0.00400419	18	18	184	chr7	44114681	44124358
ENSG00000217325.2	PRELID1P1	transcribed_processed_pseudogene	-2.87593	-6.68819	0.00402836	6	6	198	chr6	126643488	126644390
ENSG00000134222.16	PSRC1	protein_coding	-2.87524	-2.08084	0.00403717	8	8	254	chr1	109279556	109283186
ENSG00000164938.13	TP53INP1	protein_coding	-2.87496	-1.54747	0.00404082	7	7	115	chr8	94925972	94949411
ENSG00000217128.11	FNIP1	protein_coding	-2.87216	-19.1756	0.0040767	1	1	71	chr5	131641714	131797063
ENSG00000108591.9	DRG2	protein_coding	2.86889	2.23515	0.0041191	1	1	189	chr17	18087886	18107971
ENSG00000248092.7	NNT-AS1	antisense	2.8678	0.49033	0.00413336	9	9	258	chr5	43571594	43603230
ENSG00000188522.14	FAM83G	protein_coding	2.86512	8.71539	0.00416856	2	2	82	chr17	18968789	19004804
ENSG00000137338.5	PGBD1	protein_coding	-2.86262	-0.678544	0.00420149	11	11	179	chr6	28281572	28302549
ENSG00000160712.12	IL6R	protein_coding	-2.85345	-4.62006	0.0043247	8	8	129	chr1	154405193	154469450
ENSG00000203760.8	CENPW	protein_coding	2.85161	1.81105	0.0043498	1	1	104	chr6	126340174	126348875
ENSG00000168852.12	TPTE2P5	transcribed_unprocessed_pseudogene	-2.84827	-5.27412	0.00439572	2	2	143	chr13	40822296	40921749
ENSG00000232021.6	LEF1-AS1	processed_transcript	2.84668	4.1268	0.0044178	15	16	444	chr4	108167525	108256836
ENSG00000130748.6	TMEM160	protein_coding	-2.8453	-2.29195	0.00443692	13	13	92	chr19	47045907	47048630
ENSG00000039523.19	FAM65A	protein_coding	-2.84501	-7.16123	0.00444096	7	7	72	chr16	67518418	67546788
ENSG00000169689.14	CENPX	protein_coding	2.84335	0.465142	0.0044642	1	1	301	chr17	82018702	82024107
ENSG00000167595.14	PROSER3	protein_coding	-2.8375	-0.57442	0.00454677	24	25	202	chr19	35758143	35769864
ENSG00000180061.9	TMEM150B	protein_coding	2.83725	2.07387	0.00455042	44	46	904	chr19	55312801	55325340
ENSG00000101004.14	NINL	protein_coding	-2.83611	-2.89135	0.00456665	10	10	261	chr20	25452705	25585517
ENSG00000211640.4	IGLV6-57	IG_V_gene	-2.82945	-0.363787	0.00466281	17	18	416	chr22	22195799	22196276
ENSG00000143303.11	RRNAD1	protein_coding	2.82912	2.90644	0.00466769	11	12	118	chr1	156728442	156736960
ENSG00000161647.18	MPP3	protein_coding	-2.82592	-2.35349	0.00471447	4	4	397	chr17	43800799	43833170
ENSG00000145740.18	SLC30A5	protein_coding	-2.82514	-5.82615	0.004726	7	7	109	chr5	69093646	69131069
ENSG00000114857.17	NKTR	protein_coding	2.82432	0.700547	0.00473817	3	3	269	chr3	42600614	42648741
ENSG00000114956.19	DGUOK	protein_coding	-2.82387	-3.28839	0.00474473	8	8	88	chr2	73926826	73958961
ENSG00000197279.3	ZNF165	protein_coding	-2.82333	-0.67349	0.00475274	17	17	201	chr6	28080975	28089563
ENSG00000124593.15	RP11-298J23.10	protein_coding	-2.82276	-0.980489	0.00476121	6	6	160	chr6	41781358	41787372
ENSG00000162139.9	NEU3	protein_coding	2.81972	1.75195	0.00480661	6	6	128	chr11	74988134	75018893
ENSG00000122035.6	RASL11A	protein_coding	-2.81909	-7.9281	0.00481606	10	14	185	chr13	27270327	27273690
ENSG00000229989.3	MIR181A1HG	lincRNA	2.81377	2.56342	0.00489646	7	7	245	chr1	198807493	198937429
ENSG00000233006.6	AC034220.3	processed_transcript	2.81321	0.313272	0.00490499	6	6	278	chr5	132311285	132369916
ENSG00000007306.14	CEACAM7	protein_coding	2.81056	2.60523	0.00494557	11	13	301	chr19	41673307	41706976
ENSG00000109956.12	B3GAT1	protein_coding	-2.80797	-1.24767	0.00498543	13	13	635	chr11	134378506	134411918
ENSG00000171148.13	TADA3	protein_coding	2.80592	5.93653	0.0050173	1	1	105	chr3	9779860	9793011
ENSG00000196812.4	ZSCAN16	protein_coding	-2.80155	-2.67609	0.00508583	7	7	89	chr6	28124560	28130082
ENSG00000227992.1	AC108463.2	processed_pseudogene	2.79972	0.445817	0.00511472	20	22	259	chr2	111203964	111206215
ENSG00000103351.12	CLUAP1	protein_coding	-2.79924	-0.256682	0.00512227	38	38	496	chr16	3500924	3539048
ENSG00000105750.14	ZNF85	protein_coding	2.79917	1.16883	0.00512339	21	23	293	chr19	20923222	20950697
ENSG00000112851.14	ERBIN	protein_coding	2.7983	4.83495	0.00513719	12	12	109	chr5	65926475	66082549
ENSG00000247240.7	UBL7-AS1	antisense	2.79571	5.02605	0.00517862	6	6	83	chr15	74461265	74481302
ENSG00000167395.10	ZNF646	protein_coding	2.79295	2.24381	0.00522297	13	13	113	chr16	31074422	31084196
ENSG00000123636.17	BAZ2B	protein_coding	2.7893	0.501503	0.00528228	13	13	163	chr2	159318979	159616692
ENSG00000186910.3	SERPINA11	protein_coding	2.78652	3.79297	0.00532765	9	10	227	chr14	94442464	94452790
ENSG00000163467.11	TSACC	protein_coding	2.78604	7.03538	0.00533559	4	4	78	chr1	156337314	156346995
ENSG00000261040.6	WFDC21P	processed_transcript	2.78451	4.09383	0.00536089	16	16	318	chr17	60083566	60091885
ENSG00000006837.11	CDKL3	protein_coding	-2.7816	-7.53996	0.00540922	2	2	88	chr5	134286350	134371047
ENSG00000140598.13	EFL1	protein_coding	-2.77675	-1.94389	0.00549061	15	16	202	chr15	82130230	82262763
ENSG00000203288.3	TDRKH-AS1	antisense	-2.77546	-0.810064	0.00551231	16	16	165	chr1	151790804	151794402
ENSG00000159069.13	FBXW5	protein_coding	-2.77291	-6.84344	0.00555571	3	8	135	chr9	136940435	136944687
ENSG00000119640.8	ACYP1	protein_coding	-2.77268	-0.682631	0.00555974	13	13	96	chr14	75053221	75069483
ENSG00000111886.10	GABRR2	protein_coding	2.77156	3.77256	0.00557878	3	3	139	chr6	89257520	89315299
ENSG00000105993.14	DNAJB6	protein_coding	2.76842	0.487059	0.00563292	9	9	95	chr7	157335381	157417439
ENSG00000077152.9	UBE2T	protein_coding	2.7669	4.0802	0.00565917	7	8	77	chr1	202331657	202341980
ENSG00000112062.10	MAPK14	protein_coding	2.76621	1.6264	0.00567115	17	17	134	chr6	36027677	36111236
ENSG00000108557.18	RAI1	protein_coding	2.7655	1.86317	0.0056835	6	6	81	chr17	17681473	17811453
ENSG00000187231.13	SESTD1	protein_coding	-2.76543	-0.515086	0.00568469	20	20	158	chr2	179101692	179264790
ENSG00000196724.12	ZNF418	protein_coding	2.76449	49.1345	0.0057011	1	1	140	chr19	57921884	57935393
ENSG00000118579.12	MED28	protein_coding	-2.76187	-0.877942	0.00574719	15	17	331	chr4	17614631	17634105
ENSG00000134072.10	CAMK1	protein_coding	-2.76086	-4.41774	0.00576496	6	6	97	chr3	9757342	9769992
ENSG00000009335.17	UBE3C	protein_coding	-2.75921	-2.96835	0.00579411	8	9	126	chr7	157138913	157269372
ENSG00000164051.13	CCDC51	protein_coding	-2.75893	-2.57809	0.00579914	3	3	49	chr3	48432164	48440456
ENSG00000012822.15	CALCOCO1	protein_coding	-2.75859	-6.36481	0.00580518	9	9	73	chr12	53708517	53727745
ENSG00000131435.12	PDLIM4	protein_coding	-2.75827	-0.574951	0.0058109	9	9	117	chr5	132257671	132273454
ENSG00000049656.13	CLPTM1L	protein_coding	-2.75668	-3.18938	0.00583908	13	13	118	chr5	1317744	1345099
ENSG00000102445.18	RUBCNL	protein_coding	-2.75568	-2.78307	0.00585696	12	13	101	chr13	46342000	46438190
ENSG00000167548.14	KMT2D	protein_coding	-2.75421	-28.0832	0.00588332	5	6	72	chr12	49018975	49059774
ENSG00000100811.12	YY1	protein_coding	2.75198	2.96871	0.00592364	10	10	102	chr14	100238298	100282792
ENSG00000120318.15	ARAP3	protein_coding	2.75175	1.69191	0.00592777	23	23	522	chr5	141653401	141682221
ENSG00000162630.5	B3GALT2	protein_coding	2.7506	1.45936	0.00594869	10	10	514	chr1	193179045	193186654
ENSG00000206503.12	HLA-A	protein_coding	-2.74952	-0.227655	0.00596826	24	25	462	chr6	29941260	29945884
ENSG00000157335.20	CLEC18C	protein_coding	-2.74741	-0.378692	0.00600672	4	4	272	chr16	70173322	70187256
ENSG00000103199.13	ZNF500	protein_coding	-2.74704	-0.390779	0.00601358	46	47	492	chr16	4748239	4767624
ENSG00000104915.14	STX10	protein_coding	2.74456	7.0091	0.0060592	12	12	159	chr19	13144058	13150383
ENSG00000158691.14	ZSCAN12	protein_coding	-2.74422	-5.52228	0.00606552	6	6	109	chr6	28378955	28399734
ENSG00000129055.12	ANAPC13	protein_coding	2.74313	0.238534	0.00608574	3	4	388	chr3	134477706	134486716
ENSG00000225828.1	FAM229A	protein_coding	2.74023	9.674	0.00613969	8	8	95	chr1	32361270	32364278
ENSG00000053900.10	ANAPC4	protein_coding	2.73976	0.366928	0.00614832	13	13	355	chr4	25377213	25418498
ENSG00000092931.11	MFSD11	protein_coding	-2.7377	-2.96675	0.0061871	19	20	203	chr17	76735865	76781449
ENSG00000095485.16	CWF19L1	protein_coding	-2.73693	-0.267633	0.00620157	7	7	360	chr10	100232298	100267680
ENSG00000138777.19	PPA2	protein_coding	-2.73386	-0.717423	0.00625976	27	27	338	chr4	105369077	105474081
ENSG00000137033.11	IL33	protein_coding	-2.73108	-1.421	0.00631262	28	28	563	chr9	6215786	6257983
ENSG00000188002.10	RP11-43F13.1	transcribed_unprocessed_pseudogene	-2.72903	-0.15807	0.00635217	5	5	494	chr5	1598920	1634005
ENSG00000159723.4	AGRP	protein_coding	-2.72226	-2.18555	0.00648362	5	5	210	chr16	67482571	67483813
ENSG00000100014.19	SPECC1L	protein_coding	2.71846	0.897872	0.00655873	20	23	215	chr22	24270817	24417740
ENSG00000169413.2	RNASE6	protein_coding	2.71806	1.2177	0.00656666	17	18	708	chr14	20781051	20782467
ENSG00000101294.16	HM13	protein_coding	2.71667	13.1263	0.0065943	1	1	92	chr20	31514428	31577923
ENSG00000185760.15	KCNQ5	protein_coding	2.71554	2.33114	0.00661669	24	24	656	chr6	72621792	73198851
ENSG00000171928.13	TVP23B	protein_coding	-2.71462	-0.304841	0.0066351	1	1	212	chr17	18780995	18806714
ENSG00000122386.10	ZNF205	protein_coding	-2.71166	-0.120765	0.0066947	4	4	171	chr16	3112560	3120517
ENSG00000155744.9	FAM126B	protein_coding	-2.70982	-3.98242	0.00673205	11	12	93	chr2	200973718	201071669
ENSG00000167526.13	RPL13	protein_coding	-2.70785	-3.0043	0.00677212	11	11	272	chr16	89560657	89566828
ENSG00000166750.9	SLFN5	protein_coding	-2.7076	-0.422337	0.00677718	6	8	277	chr17	35243036	35273655
ENSG00000109323.8	MANBA	protein_coding	-2.70401	-1.63221	0.00685073	8	8	139	chr4	102631893	102760994
ENSG00000174130.12	TLR6	protein_coding	-2.70361	-0.936755	0.00685913	19	19	129	chr4	38823715	38856817
ENSG00000168268.10	NT5DC2	protein_coding	-2.70214	-0.764286	0.00688957	22	22	197	chr3	52524385	52535054
ENSG00000187957.7	DNER	protein_coding	-2.70124	-4.7778	0.00690819	2	2	697	chr2	229357629	229714558
ENSG00000100601.9	ALKBH1	protein_coding	2.70093	1.46267	0.00691449	12	12	154	chr14	77672404	77708020
ENSG00000085733.15	CTTN	protein_coding	-2.70086	-5.53198	0.006916	1	1	152	chr11	70398404	70436584
ENSG00000185163.9	DDX51	protein_coding	-2.70085	-2.59874	0.00691634	12	12	285	chr12	132136594	132144335
ENSG00000056972.18	TRAF3IP2	protein_coding	2.70051	1.23081	0.00692325	9	9	97	chr6	111556454	111606278
ENSG00000189134.3	NKAPL	protein_coding	-2.69955	-2.8435	0.0069433	3	3	73	chr6	28259320	28260958
ENSG00000113558.18	SKP1	protein_coding	2.69886	3.43561	0.00695769	13	13	132	chr5	134148935	134177038
ENSG00000111530.12	CAND1	protein_coding	2.69413	6.01571	0.00705735	10	12	169	chr12	67269281	67319951
ENSG00000131626.16	PPFIA1	protein_coding	2.69389	0.400041	0.00706243	3	3	355	chr11	70270700	70384403
ENSG00000198064.13	NPIPB13	protein_coding	2.69284	2.66348	0.0070847	1	1	97	chr16	30222937	30254510
ENSG00000232112.3	TMA7	protein_coding	-2.68968	-0.999321	0.0071521	7	7	142	chr3	48440257	48444208
ENSG00000162739.13	SLAMF6	protein_coding	-2.68807	-2.89084	0.00718663	32	32	569	chr1	160485030	160523262
ENSG00000117643.14	MAN1C1	protein_coding	2.68602	3.03858	0.0072309	10	11	125	chr1	25617468	25786207
ENSG00000173992.8	CCS	protein_coding	-2.68586	-0.479214	0.00723431	2	2	149	chr11	66592821	66606019
ENSG00000172568.4	FNDC9	protein_coding	-2.68409	-0.564713	0.00727274	11	11	406	chr5	157341600	157345721
ENSG00000204439.3	C6orf47	protein_coding	2.67942	15.2879	0.00737507	3	3	77	chr6	31658298	31660772
ENSG00000185640.5	KRT79	protein_coding	-2.67822	-2.3092	0.0074015	10	10	192	chr12	52821447	52834295
ENSG00000164045.11	CDC25A	protein_coding	2.67751	1.38448	0.00741713	6	6	204	chr3	48157146	48188402
ENSG00000102699.5	PARP4	protein_coding	-2.67491	-1.44956	0.00747493	9	9	213	chr13	24420926	24512810
ENSG00000158104.11	HPD	protein_coding	2.67409	3.68571	0.00749333	3	3	100	chr12	121839527	121863596
ENSG00000123416.15	TUBA1B	protein_coding	2.67354	5.8208	0.0075055	8	9	107	chr12	49127782	49131397
ENSG00000132256.18	TRIM5	protein_coding	2.67272	1.80459	0.00752389	9	9	178	chr11	5663557	5938619
ENSG00000235173.6	HGH1	protein_coding	2.67154	7.36663	0.00755041	5	5	102	chr8	144137769	144140843
ENSG00000176532.3	PRR15	protein_coding	-2.67095	-9.48974	0.0075637	1	1	504	chr7	29563811	29567295
ENSG00000177888.7	ZBTB41	protein_coding	2.67037	5.47244	0.00757675	6	6	109	chr1	197153680	197200542
ENSG00000167130.17	DOLPP1	protein_coding	-2.6685	-3.94857	0.00761907	5	5	110	chr9	129081100	129090438
ENSG00000213279.2	RP1-29C18.9	lincRNA	-2.66846	-1.52654	0.00762	1	1	656	chr22	49572264	49575426
ENSG00000185499.16	MUC1	protein_coding	-2.66843	-0.397573	0.00762072	14	14	148	chr1	155185824	155192916
ENSG00000158062.20	UBXN11	protein_coding	2.66706	2.30463	0.00765177	11	11	149	chr1	26281328	26318363
ENSG00000140474.12	ULK3	protein_coding	2.66212	1.15864	0.00776495	15	15	184	chr15	74836116	74843197
ENSG00000187626.8	ZKSCAN4	protein_coding	-2.6605	-2.19118	0.0078024	3	3	112	chr6	28244623	28252224
ENSG00000072818.11	ACAP1	protein_coding	2.65958	4.47304	0.00782391	4	4	134	chr17	7336529	7351478
ENSG00000219392.1	ZNF602P	unprocessed_pseudogene	2.65932	0.286486	0.00782993	25	25	432	chr6	28115628	28116551
ENSG00000186115.12	CYP4F2	protein_coding	-2.65717	-0.460988	0.00788004	16	16	387	chr19	15878023	15898120
ENSG00000162148.10	PPP1R32	protein_coding	2.65477	4.49871	0.00793616	12	13	163	chr11	61481120	61490931
ENSG00000166260.10	COX11	protein_coding	2.6495	0.632698	0.00806102	23	24	279	chr17	54951902	54968785
ENSG00000247345.2	RP11-266N13.2	antisense	-2.64934	-0.21677	0.00806486	21	27	47	chr5	59039761	59063503
ENSG00000179335.18	CLK3	protein_coding	2.64847	14.9729	0.00808574	4	4	82	chr15	74598500	74645414
ENSG00000204625.10	HCG9	lincRNA	-2.64433	-0.206304	0.00818535	36	37	479	chr6	29975112	29978410
ENSG00000136636.12	KCTD3	protein_coding	-2.64338	-5.00996	0.00820829	4	5	50	chr1	215567392	215621807
ENSG00000246889.2	AP000487.5	antisense	2.64185	9.71828	0.0082455	1	1	105	chr11	70372246	70398488
ENSG00000205981.6	DNAJC19	protein_coding	2.64061	2.78834	0.0082757	10	10	151	chr3	180983709	180989773
ENSG00000161405.16	IKZF3	protein_coding	2.63893	3.0122	0.00831677	6	7	442	chr17	39757715	39864188
ENSG00000172113.8	NME6	protein_coding	-2.63722	-0.306021	0.00835881	6	6	191	chr3	48293264	48301685
ENSG00000186417.13	GLDN	protein_coding	2.63606	0.463251	0.00838738	24	24	434	chr15	51341629	51408013
ENSG00000121152.9	NCAPH	protein_coding	2.63453	26.4641	0.00842528	3	3	59	chr2	96335787	96373845
ENSG00000088992.17	TESC	protein_coding	2.63382	4.35668	0.00844308	3	3	514	chr12	117038923	117099479
ENSG00000033867.16	SLC4A7	protein_coding	-2.63286	-5.80563	0.00846704	5	5	152	chr3	27372721	27484420
ENSG00000175376.8	EIF1AD	protein_coding	2.63213	16.9162	0.0084852	1	1	136	chr11	65996545	66002176
ENSG00000109667.11	SLC2A9	protein_coding	-2.6317	-0.31761	0.00849595	15	17	289	chr4	9771153	10054936
ENSG00000259804.1	CTD-2012K14.7	antisense	-2.63134	-6.32421	0.00850492	2	2	54	chr16	67561411	67562309
ENSG00000134463.14	ECHDC3	protein_coding	2.63081	1.29507	0.0085181	36	37	374	chr10	11742366	11764070
ENSG00000122970.15	IFT81	protein_coding	2.63059	10.1592	0.00852378	6	6	117	chr12	110124335	110218797
ENSG00000106305.9	AIMP2	protein_coding	-2.62979	-2.93805	0.0085437	10	11	142	chr7	6009245	6023834
ENSG00000021762.19	OSBPL5	protein_coding	-2.62878	-0.414591	0.0085692	25	27	239	chr11	3087116	3165770
ENSG00000162244.10	RPL29	protein_coding	-2.62771	-6.3921	0.00859606	8	8	83	chr3	51993600	51995942
ENSG00000111237.18	VPS29	protein_coding	2.62709	1.52625	0.00861173	15	15	208	chr12	110491097	110502117
ENSG00000174939.10	ASPHD1	protein_coding	-2.6268	-2.85824	0.0086193	4	4	60	chr16	29900375	29919864
ENSG00000080546.13	SESN1	protein_coding	-2.62634	-2.45193	0.00863081	5	5	59	chr6	108986437	109094819
ENSG00000174456.13	C12orf76	protein_coding	-2.62596	-1.26415	0.00864046	6	6	93	chr12	110027028	110073686
ENSG00000123610.4	TNFAIP6	protein_coding	2.62573	0.452736	0.00864637	8	8	140	chr2	151357592	151380048
ENSG00000118496.4	FBXO30	protein_coding	-2.62572	-6.29917	0.00864666	9	9	102	chr6	145793502	145814753
ENSG00000178226.10	PRSS36	protein_coding	-2.6252	-12.7592	0.00865986	4	4	168	chr16	31138925	31150094
ENSG00000207248.1	RNU6-1005P	snRNA	2.6242	0.811845	0.00868537	4	5	8	chr16	21642054	21642160
ENSG00000245748.1	RP11-367J11.2	antisense	-2.62309	-2.70284	0.0087135	1	1	777	chr4	7030554	7046231
ENSG00000160953.15	MUM1	protein_coding	2.62068	1.73023	0.00877554	2	2	173	chr19	1354711	1378431
ENSG00000145996.11	CDKAL1	protein_coding	-2.61998	-1.75083	0.00879342	5	5	110	chr6	20534457	21232404
ENSG00000197008.9	ZNF138	protein_coding	2.61858	0.394555	0.00882975	18	18	266	chr7	64794388	64833681
ENSG00000245937.7	LINC01184	lincRNA	-2.61768	-0.491064	0.00885287	20	20	269	chr5	127940426	128083172
ENSG00000196787.3	HIST1H2AG	protein_coding	2.61383	5.75304	0.00895324	2	2	81	chr6	27133042	27135291
ENSG00000076003.4	MCM6	protein_coding	-2.60807	-0.777085	0.00910536	11	12	119	chr2	135839626	135876426
ENSG00000105717.13	PBX4	protein_coding	-2.60786	-29.4841	0.00911115	4	6	67	chr19	19561707	19618916
ENSG00000186281.12	GPAT2	protein_coding	-2.60634	-0.445027	0.00915143	6	6	151	chr2	96021946	96039451
ENSG00000107968.9	MAP3K8	protein_coding	-2.60584	-1.99068	0.009165	11	11	102	chr10	30433937	30461833
ENSG00000064300.8	NGFR	protein_coding	2.60359	1.97662	0.00922533	7	8	82	chr17	49495293	49515017
ENSG00000231584.8	FAHD2CP	transcribed_unprocessed_pseudogene	-2.6033	-0.58052	0.00923318	7	7	166	chr2	96010551	96023380
ENSG00000168394.10	TAP1	protein_coding	-2.60154	-1.11044	0.00928068	22	22	223	chr6	32845209	32853978
ENSG00000105698.15	USF2	protein_coding	-2.6013	-1.5935	0.00928708	12	13	97	chr19	35268978	35279815
ENSG00000111424.10	VDR	protein_coding	2.60064	0.99454	0.00930501	32	32	533	chr12	47841537	47943048
ENSG00000168792.4	ABHD15	protein_coding	2.59884	4.23526	0.00935406	8	9	154	chr17	29560547	29567137
ENSG00000142765.17	SYTL1	protein_coding	-2.5982	-3.97734	0.00937137	7	7	134	chr1	27342020	27353932
ENSG00000115368.9	WDR75	protein_coding	-2.5975	-1.14312	0.00939063	10	10	202	chr2	189441433	189475565
ENSG00000187778.13	MCRS1	protein_coding	2.59464	5.61424	0.00946908	6	6	75	chr12	49556544	49568153
ENSG00000096654.15	ZNF184	protein_coding	-2.59428	-38.8153	0.00947899	5	5	153	chr6	27450743	27473118
ENSG00000073282.12	TP63	protein_coding	-2.5942	-25.1018	0.0094812	1	1	652	chr3	189631427	189897279
ENSG00000188886.3	ASTL	protein_coding	-2.59415	-1.59085	0.0094824	5	5	214	chr2	96123850	96138436
ENSG00000219891.2	ZSCAN12P1	transcribed_unprocessed_pseudogene	-2.59292	-0.379855	0.0095166	13	13	161	chr6	28091154	28093664
ENSG00000179751.6	SYCN	protein_coding	-2.59084	-9.47147	0.0095743	2	2	88	chr19	39202831	39204266
ENSG00000143624.13	INTS3	protein_coding	-2.59073	-15.3551	0.00957731	5	5	58	chr1	153728067	153774808
ENSG00000103051.18	COG4	protein_coding	2.58864	0.524434	0.00963555	22	26	268	chr16	70480568	70523565
ENSG00000005059.15	MCUB	protein_coding	-2.58815	-3.04175	0.00964917	6	6	48	chr4	109560205	109688726
ENSG00000173064.12	HECTD4	protein_coding	2.58579	6.78072	0.00971549	8	8	105	chr12	112160188	112382439
ENSG00000005844.17	ITGAL	protein_coding	-2.58467	-5.55617	0.00974722	3	3	59	chr16	30472658	30523185
ENSG00000182866.16	LCK	protein_coding	-2.58414	-9.64932	0.00976226	10	10	395	chr1	32251239	32286165
ENSG00000118508.4	RAB32	protein_coding	-2.58273	-4.49398	0.00980229	7	7	126	chr6	146543693	146554965
ENSG00000169884.13	WNT10B	protein_coding	-2.58233	-3.00788	0.00981364	9	9	119	chr12	48965340	48971763
ENSG00000134375.10	TIMM17A	protein_coding	2.58136	0.810044	0.00984115	8	8	161	chr1	201955491	201970661
ENSG00000116830.11	TTF2	protein_coding	2.57965	0.209538	0.00989014	2	2	211	chr1	117060303	117107453
ENSG00000125650.4	PSPN	protein_coding	-2.57825	-2.07796	0.0099301	12	12	113	chr19	6375148	6379058
ENSG00000187735.13	TCEA1	protein_coding	-2.57631	-37.9806	0.0099862	2	2	102	chr8	53966552	54022529
ENSG00000005189.19	AC004381.6	protein_coding	2.57577	0.659663	0.0100017	12	12	162	chr16	20806429	20849668
ENSG00000171817.16	ZNF540	protein_coding	-2.57544	-2.69468	0.0100112	6	6	77	chr19	37551406	37614097
ENSG00000246214.1	RP11-260E18.1	antisense	-2.57289	-1.14448	0.0100854	24	24	420	chr5	16615926	16629969
ENSG00000132589.15	FLOT2	protein_coding	2.57217	13.5608	0.0101062	3	3	47	chr17	28879335	28897679
ENSG00000124688.13	MAD2L1BP	protein_coding	-2.56998	-3.63157	0.0101703	6	6	74	chr6	43629540	43640952
ENSG00000139734.17	DIAPH3	protein_coding	2.56804	9.10169	0.0102275	16	16	591	chr13	59665583	60163987
ENSG00000172071.11	EIF2AK3	protein_coding	-2.56781	-4.53457	0.0102345	4	5	91	chr2	88556741	88627576
ENSG00000249751.3	ECSCR	protein_coding	2.56772	1.9598	0.010237	5	5	78	chr5	139448556	139462743
ENSG00000204366.3	ZBTB12	protein_coding	2.56739	1.58511	0.0102468	8	8	166	chr6	31899607	31901992
ENSG00000230006.7	ANKRD36BP2	transcribed_unprocessed_pseudogene	2.56608	0.825342	0.0102855	5	5	385	chr2	88765807	88806612
ENSG00000173482.16	PTPRM	protein_coding	2.56404	1.77729	0.0103463	7	9	151	chr18	7566782	8406861
ENSG00000160404.17	TOR2A	protein_coding	-2.56369	-9.22506	0.0103566	6	6	81	chr9	127731524	127735317
ENSG00000104047.14	DTWD1	protein_coding	-2.56326	-186.677	0.0103696	2	2	155	chr15	49620980	49656232
ENSG00000156515.21	HK1	protein_coding	-2.56152	-4.56594	0.0104216	12	12	94	chr10	69269984	69401882
ENSG00000169442.8	CD52	protein_coding	-2.56126	-0.204502	0.0104293	11	13	146	chr1	26317957	26320523
ENSG00000175768.12	TOMM5	protein_coding	2.56064	3.1571	0.0104479	5	5	65	chr9	37582646	37592642
ENSG00000105672.14	ETV2	protein_coding	2.56057	1.03863	0.01045	1	1	135	chr19	35641745	35644871
ENSG00000090857.13	PDPR	protein_coding	2.55944	0.219361	0.0104841	21	21	307	chr16	70113626	70162537
ENSG00000168061.14	SAC3D1	protein_coding	2.55876	2.53089	0.0105047	7	7	125	chr11	65040901	65044828
ENSG00000113522.13	RAD50	protein_coding	-2.55845	-23.562	0.010514	1	1	166	chr5	132556019	132646344
ENSG00000136271.10	DDX56	protein_coding	-2.55431	-33.9206	0.01064	1	1	122	chr7	44565417	44575051
ENSG00000226266.6	AC009961.3	lincRNA	-2.55365	-0.228284	0.0106599	27	28	301	chr2	159670708	159712435
ENSG00000116539.12	ASH1L	protein_coding	-2.55351	-10.5507	0.0106642	4	4	72	chr1	155335268	155562807
ENSG00000127863.15	TNFRSF19	protein_coding	2.55251	38.1057	0.010695	1	1	95	chr13	23570370	23676104
ENSG00000122986.13	HVCN1	protein_coding	-2.55193	-4.53472	0.0107129	5	5	80	chr12	110627841	110704950
ENSG00000123505.15	AMD1	protein_coding	-2.55155	-4.40143	0.0107246	10	10	73	chr6	110874770	110895713
ENSG00000105668.7	UPK1A	protein_coding	2.54832	0.117678	0.0108243	10	10	550	chr19	35666516	35678483
ENSG00000255002.1	CTD-2509G16.2	lincRNA	2.54421	1.60049	0.0109527	5	5	189	chr14	65212893	65222347
ENSG00000204685.6	STARD7-AS1	processed_transcript	2.54402	42.5938	0.0109584	2	2	74	chr2	96208416	96242594
ENSG00000166743.9	ACSM1	protein_coding	2.54328	0.17615	0.0109819	32	34	415	chr16	20623237	20698890
ENSG00000176953.12	NFATC2IP	protein_coding	-2.54261	-3.22464	0.0110028	7	8	143	chr16	28950807	28967097
ENSG00000164048.13	ZNF589	protein_coding	2.53901	0.111342	0.0111168	3	3	275	chr3	48241100	48299253
ENSG00000066654.13	THUMPD1	protein_coding	2.53856	0.749476	0.011131	9	9	138	chr16	20702816	20742084
ENSG00000198646.13	NCOA6	protein_coding	-2.53764	-2.21756	0.0111603	12	12	180	chr20	34689097	34825649
ENSG00000152684.10	PELO	protein_coding	-2.53731	-3.87154	0.0111708	2	2	157	chr5	52787940	52804046
ENSG00000196155.12	PLEKHG4	protein_coding	2.53527	3.93853	0.0112361	3	3	68	chr16	67277510	67289499
ENSG00000074964.16	ARHGEF10L	protein_coding	-2.53378	-2.87247	0.0112841	8	8	111	chr1	17539835	17697869
ENSG00000163728.10	TTC14	protein_coding	2.53348	3.60118	0.0112936	10	10	181	chr3	180602130	180617828
ENSG00000052126.14	PLEKHA5	protein_coding	-2.53333	-2.43808	0.0112986	28	28	550	chr12	19129752	19376400
ENSG00000214548.14	MEG3	lincRNA	-2.53277	-2.80843	0.0113167	9	10	80	chr14	100779410	100861031
ENSG00000173744.17	AGFG1	protein_coding	2.53021	8.64158	0.0113994	9	9	105	chr2	227472152	227561214
ENSG00000158636.16	EMSY	protein_coding	2.52719	5.48736	0.011498	10	10	123	chr11	76445022	76553025
ENSG00000183421.11	RIPK4	protein_coding	2.52708	1.20181	0.0115015	23	25	722	chr21	41739369	41767106
ENSG00000213413.2	PVRIG	protein_coding	2.52694	0.737237	0.011506	13	13	241	chr7	100218241	100221490
ENSG00000174607.10	UGT8	protein_coding	2.52663	1.55313	0.0115162	12	12	543	chr4	114598455	114678224
ENSG00000196588.14	MKL1	protein_coding	2.52579	4.18333	0.0115438	7	7	76	chr22	40410281	40636702
ENSG00000112041.12	TULP1	protein_coding	2.52455	1.96669	0.0115846	22	23	376	chr6	35497874	35512938
ENSG00000164047.4	CAMP	protein_coding	-2.52263	-18.3524	0.011648	1	1	276	chr3	48223347	48225491
ENSG00000158186.12	MRAS	protein_coding	-2.5222	-1.6988	0.0116623	3	3	122	chr3	138347648	138405534
ENSG00000136859.9	ANGPTL2	protein_coding	2.5214	1.62164	0.0116888	18	18	109	chr9	127087332	127122883
ENSG00000229759.1	MRPS18AP1	processed_pseudogene	2.52	0.0951486	0.0117353	4	4	244	chr3	48256350	48256938
ENSG00000166963.12	MAP1A	protein_coding	-2.51958	-7.25917	0.0117494	4	4	81	chr15	43510958	43531620
ENSG00000134575.9	ACP2	protein_coding	2.5193	0.386932	0.011759	9	9	171	chr11	47239302	47248906
ENSG00000065534.18	MYLK	protein_coding	2.51769	2.32939	0.0118126	4	4	69	chr3	123610049	123884331
ENSG00000215845.10	TSTD1	protein_coding	2.51528	0.977129	0.0118937	10	10	286	chr1	161037631	161038990
ENSG00000100532.11	CGRRF1	protein_coding	2.51062	10.096	0.012052	5	5	100	chr14	54509812	54539309
ENSG00000126267.8	COX6B1	protein_coding	-2.51055	-0.825006	0.0120544	10	10	242	chr19	35648223	35658861
ENSG00000134574.11	DDB2	protein_coding	2.5102	1.41929	0.0120664	7	7	88	chr11	47214465	47239240
ENSG00000167077.12	MEI1	protein_coding	-2.5075	-0.379161	0.012159	14	14	166	chr22	41699499	41799456
ENSG00000138623.9	SEMA7A	protein_coding	-2.50558	-0.821602	0.0122252	7	7	120	chr15	74409289	74434467
ENSG00000148335.14	NTMT1	protein_coding	-2.50385	-6.99364	0.012285	5	5	46	chr9	129608884	129636131
ENSG00000170091.10	HMP19	protein_coding	2.50371	1.19223	0.0122898	13	13	125	chr5	174045604	174243501
ENSG00000174903.15	RAB1B	protein_coding	-2.5036	-39.7156	0.0122938	4	4	83	chr11	66268533	66277492
ENSG00000135336.14	ORC3	protein_coding	-2.50343	-4.73709	0.0122997	9	9	112	chr6	87590067	87667453
ENSG00000168300.13	PCMTD1	protein_coding	2.50313	2.087	0.01231	5	5	126	chr8	51817575	51899186
ENSG00000047849.21	MAP4	protein_coding	-2.50213	-1.19091	0.0123449	5	5	98	chr3	47850690	48089272
ENSG00000070423.17	RNF126	protein_coding	-2.50161	-11.4206	0.012363	1	1	151	chr19	647526	663277
ENSG00000124641.15	MED20	protein_coding	2.50105	0.784487	0.0123826	11	11	206	chr6	41905354	41921139
ENSG00000215045.8	GRID2IP	protein_coding	2.49691	63.3894	0.012528	1	1	713	chr7	6497462	6551436
ENSG00000113520.10	IL4	protein_coding	2.49524	3.51775	0.0125872	3	3	100	chr5	132673986	132682676
ENSG00000175467.14	SART1	protein_coding	2.49475	15.4519	0.0126046	5	5	72	chr11	65961689	65979828
ENSG00000106484.14	MEST	protein_coding	2.49307	0.902635	0.0126645	6	6	179	chr7	130486171	130506296
ENSG00000125869.9	LAMP5	protein_coding	2.49271	0.624636	0.0126774	37	37	625	chr20	9514358	9530524
ENSG00000238160.1	AC116366.5	antisense	2.49194	12.3175	0.0127047	2	2	77	chr5	132419416	132426714
ENSG00000234911.1	TEX21P	unitary_pseudogene	-2.49141	-7.36428	0.0127237	3	3	74	chr14	64346171	64374666
ENSG00000162526.6	TSSK3	protein_coding	2.49088	2.99604	0.0127427	9	9	110	chr1	32351521	32364312
ENSG00000134297.6	PLEKHA8P1	transcribed_processed_pseudogene	2.49054	2.87915	0.0127548	6	7	82	chr12	45173064	45216041
ENSG00000143393.16	PI4KB	protein_coding	-2.48979	-52.3836	0.012782	2	2	60	chr1	151291797	151327715
ENSG00000103429.10	BFAR	protein_coding	2.48933	5.36424	0.0127985	10	10	132	chr16	14632815	14669236
ENSG00000132963.7	POMP	protein_coding	-2.48932	-6.04998	0.0127988	9	10	67	chr13	28659104	28678925
ENSG00000118518.15	RNF146	protein_coding	2.48798	9.38777	0.012847	1	1	60	chr6	127266610	127288567
ENSG00000186583.11	SPATC1	protein_coding	2.48608	1.20018	0.012916	3	3	628	chr8	144012414	144047085
ENSG00000122367.19	LDB3	protein_coding	2.48588	1.77935	0.0129232	12	12	188	chr10	86668449	86736068
ENSG00000228638.1	FCF1P2	processed_pseudogene	-2.48422	-0.249904	0.0129835	7	7	177	chr3	48290793	48291375
ENSG00000171314.8	PGAM1	protein_coding	-2.4842	-0.352642	0.0129843	14	15	199	chr10	97426160	97433441
ENSG00000125971.16	DYNLRB1	protein_coding	-2.48397	-8.73636	0.0129927	3	3	55	chr20	34516409	34540958
ENSG00000186081.11	KRT5	protein_coding	-2.48345	-1.57432	0.0130117	8	8	93	chr12	52514575	52520687
ENSG00000169490.16	TM2D2	protein_coding	-2.4817	-0.978832	0.0130759	10	11	101	chr8	38988808	38996824
ENSG00000112297.14	AIM1	protein_coding	2.4815	7.47172	0.013083	1	1	129	chr6	106360808	106571978
ENSG00000197847.12	SLC22A20	transcribed_unitary_pseudogene	2.48138	0.593444	0.0130874	11	11	148	chr11	65213840	65242757
ENSG00000204789.4	ZNF204P	processed_pseudogene	-2.481	-4.75914	0.0131016	7	7	256	chr6	27357825	27360221
ENSG00000203865.9	ATP1A1-AS1	processed_transcript	-2.4796	-273.294	0.013153	1	1	126	chr1	116392247	116418622
ENSG00000250548.6	RP11-47I22.2	lincRNA	-2.47855	-1.62381	0.0131919	8	9	293	chr14	61556313	61570653
ENSG00000133878.8	DUSP26	protein_coding	2.47806	1.06874	0.01321	8	8	107	chr8	33591332	33600106
ENSG00000187650.3	VMAC	protein_coding	-2.47601	-0.81855	0.013286	15	15	139	chr19	5904858	5910853
ENSG00000227533.5	SLC2A1-AS1	lincRNA	2.4759	0.282094	0.01329	2	2	422	chr1	42959049	42983358
ENSG00000138801.8	PAPSS1	protein_coding	2.47579	0.177819	0.0132943	15	15	220	chr4	107590276	107720452
ENSG00000088833.17	NSFL1C	protein_coding	2.47568	1.59537	0.0132983	3	3	224	chr20	1442162	1473842
ENSG00000118369.12	USP35	protein_coding	-2.47534	-1.13197	0.0133109	8	8	171	chr11	78188812	78214711
ENSG00000069974.15	RAB27A	protein_coding	2.47399	2.2469	0.0133613	20	20	229	chr15	55202966	55319113
ENSG00000017427.15	IGF1	protein_coding	2.47277	17.9038	0.0134069	3	3	572	chr12	102395867	102480645
ENSG00000160255.17	ITGB2	protein_coding	2.47255	2.42831	0.0134153	13	15	182	chr21	44885953	44931989
ENSG00000225643.1	RP11-70P17.1	lincRNA	-2.47201	-1.34708	0.0134355	7	7	66	chr1	25581478	25590356
ENSG00000160753.15	RUSC1	protein_coding	-2.47095	-3.96256	0.0134756	4	4	67	chr1	155320896	155331114
ENSG00000124813.20	RUNX2	protein_coding	-2.47014	-2.70434	0.0135062	5	5	111	chr6	45328157	45664349
ENSG00000168228.14	ZCCHC4	protein_coding	2.4697	0.440906	0.0135225	15	17	131	chr4	25312785	25370383
ENSG00000066135.12	KDM4A	protein_coding	2.46906	2.97573	0.0135467	8	10	86	chr1	43650158	43705515
ENSG00000171720.9	HDAC3	protein_coding	-2.46877	-2.07827	0.013558	7	7	90	chr5	141620876	141636870
ENSG00000197208.5	SLC22A4	protein_coding	-2.46743	-6.08175	0.0136088	2	2	69	chr5	132294443	132344206
ENSG00000162729.13	IGSF8	protein_coding	-2.46629	-6.58842	0.0136519	12	12	129	chr1	160091340	160098943
ENSG00000156853.12	ZNF689	protein_coding	-2.46531	-8.97972	0.0136894	2	2	47	chr16	30602558	30624012
ENSG00000139344.7	AMDHD1	protein_coding	2.46466	0.116785	0.0137144	9	9	284	chr12	95943293	95968716
ENSG00000171241.8	SHCBP1	protein_coding	-2.46453	-6.82793	0.0137192	2	2	46	chr16	46580554	46621626
ENSG00000150401.14	DCUN1D2	protein_coding	2.46342	2.27959	0.0137619	10	11	150	chr13	113455819	113490952
ENSG00000196236.12	XPNPEP3	protein_coding	-2.46251	-0.219112	0.0137967	12	12	231	chr22	40857097	40932815
ENSG00000125618.16	PAX8	protein_coding	2.46241	0.103249	0.0138007	24	24	345	chr2	113215997	113278950
ENSG00000198018.6	ENTPD7	protein_coding	-2.46039	-6.32301	0.0138786	3	3	138	chr10	99659506	99706240
ENSG00000109927.9	TECTA	protein_coding	2.45884	3.13278	0.0139385	4	4	89	chr11	121101173	121191493
ENSG00000138496.16	PARP9	protein_coding	-2.45768	-3.31737	0.0139837	9	9	101	chr3	122527924	122564577
ENSG00000182923.16	CEP63	protein_coding	2.45526	0.264281	0.0140785	30	31	369	chr3	134485743	134575013
ENSG00000100583.4	SAMD15	protein_coding	-2.45524	-0.527877	0.0140792	2	2	483	chr14	77376689	77391497
ENSG00000123395.14	ATG101	protein_coding	-2.45338	-2.54528	0.0141522	14	14	100	chr12	52069246	52077494
ENSG00000143546.9	S100A8	protein_coding	2.45334	8.11773	0.0141538	3	3	58	chr1	153390032	153391188
ENSG00000111231.8	GPN3	protein_coding	-2.45062	-0.161049	0.014261	1	1	58	chr12	110452484	110469268
ENSG00000175334.7	BANF1	protein_coding	2.44864	1.00535	0.0143396	2	2	155	chr11	66002079	66004149
ENSG00000083223.17	ZCCHC6	protein_coding	2.44798	3.35107	0.014366	1	1	92	chr9	86287733	86354454
ENSG00000100580.7	TMED8	protein_coding	-2.44767	-0.411207	0.0143782	19	20	233	chr14	77335021	77377109
ENSG00000197894.10	ADH5	protein_coding	-2.44626	-0.633061	0.0144347	15	15	197	chr4	99070978	99088801
ENSG00000135763.9	URB2	protein_coding	-2.44618	-9.36701	0.0144379	4	4	94	chr1	229626234	229660199
ENSG00000251692.7	PTX4	protein_coding	2.44594	1.11604	0.0144476	40	45	723	chr16	1485886	1488981
ENSG00000102531.16	FNDC3A	protein_coding	-2.44033	-3.22341	0.014674	7	7	91	chr13	48975912	49209779
ENSG00000111229.15	ARPC3	protein_coding	-2.43833	-1.37543	0.0147551	5	6	82	chr12	110434825	110450407
ENSG00000170469.10	SPATA24	protein_coding	2.43766	0.701648	0.0147825	11	11	139	chr5	139396563	139404088
ENSG00000189050.15	RNFT1	protein_coding	2.43687	1.79025	0.0148152	8	8	173	chr17	59952240	59964761
ENSG00000106560.10	GIMAP2	protein_coding	-2.43555	-2.27886	0.0148694	18	18	196	chr7	150685700	150693641
ENSG00000130508.10	PXDN	protein_coding	-2.43528	-0.297226	0.0148805	15	15	132	chr2	1631887	1744852
ENSG00000121060.16	TRIM25	protein_coding	2.43485	11.9475	0.014898	1	2	47	chr17	56887909	56914038
ENSG00000081026.18	MAGI3	protein_coding	2.4338	3.05722	0.0149411	10	10	140	chr1	113390749	113685923
ENSG00000099364.16	FBXL19	protein_coding	-2.43291	-6.71693	0.0149779	4	4	68	chr16	30923055	30948783
ENSG00000114648.11	KLHL18	protein_coding	2.43057	3.72031	0.0150753	10	10	129	chr3	47282917	47346816
ENSG00000158615.8	PPP1R15B	protein_coding	-2.42977	-4.34208	0.0151083	12	12	84	chr1	204403387	204411791
ENSG00000149476.15	TKFC	protein_coding	-2.42916	-8.92055	0.015134	4	5	49	chr11	61333210	61353295
ENSG00000228696.8	ARL17B	protein_coding	-2.42513	-0.108968	0.0153028	40	40	371	chr17	46274784	46361797
ENSG00000235897.1	TM4SF19-AS1	antisense	2.423	1.13321	0.015393	3	3	641	chr3	196318330	196325570
ENSG00000138115.13	CYP2C8	protein_coding	-2.42283	-0.669126	0.0154001	24	24	255	chr10	95036772	95069497
ENSG00000162341.16	TPCN2	protein_coding	2.42252	1.31666	0.0154134	13	13	236	chr11	69048897	69162440
ENSG00000227507.2	LTB	protein_coding	2.42215	2.66279	0.0154291	4	4	38	chr6	31580525	31582522
ENSG00000025156.12	HSF2	protein_coding	2.42189	0.174865	0.0154402	11	11	196	chr6	122399546	122433119
ENSG00000109654.14	TRIM2	protein_coding	-2.42117	-2.96039	0.0154705	9	10	184	chr4	153152342	153339320
ENSG00000157322.17	CLEC18A	protein_coding	2.42082	0.121002	0.0154856	12	12	430	chr16	69950705	69964347
ENSG00000184432.9	COPB2	protein_coding	2.41704	2.76169	0.0156474	9	9	114	chr3	139355600	139389732
ENSG00000239335.4	LLPH-AS1	antisense	-2.41608	-0.0567488	0.0156888	2	2	306	chr12	66130751	66134449
ENSG00000069122.18	ADGRF5	protein_coding	2.41557	1.75665	0.0157107	23	23	526	chr6	46852512	46954943
ENSG00000174547.13	MRPL11	protein_coding	2.41412	3.1659	0.0157732	6	6	63	chr11	66435075	66466738
ENSG00000204345.1	CD300LD	protein_coding	2.41074	1.40741	0.01592	1	1	61	chr17	74579365	74592283
ENSG00000139687.13	RB1	protein_coding	-2.40982	-2.13292	0.0159603	10	10	92	chr13	48303775	48481986
ENSG00000213939.4	RP11-314A20.1	processed_pseudogene	2.40872	9.34876	0.0160085	3	3	70	chr17	4704816	4705217
ENSG00000011422.11	PLAUR	protein_coding	-2.40703	-7.63619	0.016083	3	4	65	chr19	43646095	43670547
ENSG00000138592.13	USP8	protein_coding	2.40648	1.54308	0.016107	16	16	195	chr15	50424380	50514419
ENSG00000159618.15	ADGRG5	protein_coding	2.40647	2.73897	0.0161074	34	34	618	chr16	57542421	57591681
ENSG00000069345.11	DNAJA2	protein_coding	2.40528	4.24693	0.0161601	5	5	77	chr16	46955362	46973788
ENSG00000137871.19	ZNF280D	protein_coding	2.40485	2.14031	0.016179	9	9	101	chr15	56630181	56918571
ENSG00000152213.3	ARL11	protein_coding	-2.40483	-1.28209	0.0161798	20	20	394	chr13	49628299	49633872
ENSG00000256427.1	RP11-118B22.4	lincRNA	-2.40467	-60.4885	0.016187	1	1	510	chr12	9246497	9257960
ENSG00000164022.16	AIMP1	protein_coding	-2.40451	-5.16716	0.016194	4	4	93	chr4	106315544	106349226
ENSG00000224478.1	RP11-13P5.1	lincRNA	2.40263	6.71836	0.0162777	5	5	184	chr6	159107791	159116053
ENSG00000134864.10	GGACT	protein_coding	2.40258	2.7122	0.01628	1	1	201	chr13	100530164	100589528
ENSG00000142546.13	NOSIP	protein_coding	-2.40253	-29.6836	0.016282	1	1	85	chr19	49555711	49590262
ENSG00000156650.12	KAT6B	protein_coding	-2.4025	-2.8987	0.0162836	8	8	118	chr10	74825582	75032622
ENSG00000143416.20	SELENBP1	protein_coding	2.40179	4.97428	0.0163149	9	9	112	chr1	151364302	151372733
ENSG00000164096.12	C4orf3	protein_coding	-2.40169	-0.281247	0.0163196	14	15	177	chr4	119296419	119304445
ENSG00000157540.19	DYRK1A	protein_coding	-2.40149	-3.67892	0.0163283	4	5	105	chr21	37365790	37517450
ENSG00000170525.19	PFKFB3	protein_coding	2.40059	5.61412	0.0163686	14	14	83	chr10	6144934	6254644
ENSG00000117724.12	CENPF	protein_coding	2.39943	5.09803	0.0164208	8	8	111	chr1	214603195	214664588
ENSG00000105726.16	ATP13A1	protein_coding	-2.39865	-2.79487	0.0164558	15	15	147	chr19	19645200	19663693
ENSG00000197893.13	NRAP	protein_coding	2.39822	68.537	0.016475	1	1	111	chr10	113588716	113664127
ENSG00000213753.10	CENPBD1P1	transcribed_processed_pseudogene	2.39792	0.769684	0.0164887	9	9	159	chr19	58573503	58599801
ENSG00000092108.20	SCFD1	protein_coding	2.39779	0.302392	0.0164943	15	16	184	chr14	30622112	30735812
ENSG00000130940.14	CASZ1	protein_coding	-2.39763	-3.22329	0.0165015	9	9	99	chr1	10636604	10796650
ENSG00000102904.14	TSNAXIP1	protein_coding	2.39731	1.04175	0.0165159	5	5	141	chr16	67806765	67832148
ENSG00000226026.5	RP11-57H12.3	antisense	2.3973	0.477817	0.0165163	37	37	445	chr1	95163219	95233982
ENSG00000116701.14	NCF2	protein_coding	-2.39687	-3.70076	0.0165356	3	3	138	chr1	183555563	183590876
ENSG00000135778.11	NTPCR	protein_coding	-2.3945	-0.0762392	0.0166432	29	32	428	chr1	232950605	232983882
ENSG00000188295.14	ZNF669	protein_coding	-2.39375	-0.297804	0.016677	17	18	266	chr1	247099962	247104372
ENSG00000133805.15	AMPD3	protein_coding	-2.39357	-0.826311	0.0166853	13	13	265	chr11	10308313	10507579
ENSG00000183048.11	SLC25A10	protein_coding	2.39344	14.4519	0.016691	1	1	200	chr17	81712236	81721016
ENSG00000108840.15	HDAC5	protein_coding	-2.39336	-4.24067	0.0166948	4	4	107	chr17	44076746	44123702
ENSG00000160606.10	TLCD1	protein_coding	-2.39301	-17.3328	0.016711	1	1	79	chr17	28724348	28727935
ENSG00000178163.7	ZNF518B	protein_coding	-2.39203	-2.47044	0.0167554	3	3	249	chr4	10439874	10457408
ENSG00000135077.8	HAVCR2	protein_coding	-2.39148	-6.90611	0.0167805	3	3	65	chr5	157085832	157142869
ENSG00000178297.12	TMPRSS9	protein_coding	2.38978	0.328278	0.0168584	28	29	222	chr19	2389786	2426239
ENSG00000237272.2	OR51R1P	unitary_pseudogene	2.38923	0.455691	0.0168838	5	6	18	chr11	4418060	4419011
ENSG00000196154.11	S100A4	protein_coding	-2.38853	-6.16834	0.0169159	11	11	110	chr1	153543613	153550136
ENSG00000227632.2	AC018804.6	unprocessed_pseudogene	-2.38697	-30.6543	0.0169877	4	4	570	chr2	130202312	130212628
ENSG00000175857.8	GAPT	protein_coding	-2.38628	-0.97322	0.0170197	39	39	567	chr5	58491435	58497090
ENSG00000134291.11	TMEM106C	protein_coding	2.38472	5.46148	0.0170922	2	2	160	chr12	47963569	47968878
ENSG00000143756.11	FBXO28	protein_coding	2.38356	0.555728	0.0171459	7	7	108	chr1	224114087	224162047
ENSG00000142789.19	CELA3A	protein_coding	-2.38319	-4.53871	0.0171631	4	4	98	chr1	22001656	22012539
ENSG00000204791.9	SMPD5	transcribed_unitary_pseudogene	2.38318	2.08612	0.0171639	3	3	611	chr8	144049079	144051522
ENSG00000188511.12	C22orf34	lincRNA	2.38294	0.15818	0.0171749	20	21	811	chr22	49414524	49657542
ENSG00000154548.8	SRSF12	protein_coding	2.38112	2.17146	0.0172603	7	7	178	chr6	89095959	89118081
ENSG00000107957.16	SH3PXD2A	protein_coding	-2.38108	-1.11451	0.0172619	12	12	97	chr10	103594027	103855543
ENSG00000215837.7	SDHAP2	transcribed_unprocessed_pseudogene	-2.38028	-0.0800988	0.0172996	21	23	694	chr3	195658096	195685904
ENSG00000115274.14	INO80B	protein_coding	2.37668	1.55397	0.017469	1	1	178	chr2	74455023	74457960
ENSG00000162458.12	FBLIM1	protein_coding	-2.37668	-24.5067	0.0174691	4	4	121	chr1	15756607	15786594
ENSG00000204396.10	VWA7	protein_coding	2.37562	0.375249	0.0175196	18	20	190	chr6	31765590	31777294
ENSG00000172650.13	AGAP5	protein_coding	2.37551	2.81505	0.0175249	7	7	108	chr10	73674285	73698159
ENSG00000211611.2	IGKV6-21	IG_V_gene	2.37538	2.86171	0.0175311	3	3	179	chr2	89159751	89160366
ENSG00000034510.5	TMSB10	protein_coding	2.37446	13.7526	0.0175748	3	3	93	chr2	84905625	84906675
ENSG00000197062.11	ZSCAN26	protein_coding	2.37294	0.335191	0.0176472	21	21	338	chr6	28267010	28278224
ENSG00000168092.13	PAFAH1B2	protein_coding	-2.37056	-4.38069	0.0177611	7	7	144	chr11	117144267	117176894
ENSG00000121988.17	ZRANB3	protein_coding	2.37036	4.76111	0.0177708	3	3	79	chr2	135136916	135531236
ENSG00000137100.15	DCTN3	protein_coding	2.36864	4.17412	0.0178534	2	2	71	chr9	34613545	34620523
ENSG00000103966.10	EHD4	protein_coding	2.36862	0.778864	0.0178544	17	17	183	chr15	41895939	41972578
ENSG00000183780.12	SLC35F3	protein_coding	2.3685	0.175154	0.0178606	45	46	705	chr1	233904933	234324516
ENSG00000168765.16	GSTM4	protein_coding	2.36528	0.0881095	0.0180164	30	30	343	chr1	109656081	109674836
ENSG00000173818.16	ENDOV	protein_coding	-2.36514	-6.85198	0.0180231	2	2	265	chr17	80415165	80438086
ENSG00000241157.1	RP11-3K24.1	processed_pseudogene	2.36495	86.9717	0.0180327	2	2	141	chr17	60245288	60245647
ENSG00000178217.13	SH2D4B	protein_coding	-2.36481	-1.12467	0.0180391	18	19	285	chr10	80537902	80646560
ENSG00000184470.20	TXNRD2	protein_coding	2.364	1.49738	0.0180786	19	20	235	chr22	19875517	19941992
ENSG00000111358.13	GTF2H3	protein_coding	2.36321	2.42287	0.0181174	9	9	88	chr12	123633739	123662606
ENSG00000160161.9	CILP2	protein_coding	2.36158	1.29573	0.0181975	24	29	533	chr19	19538248	19546659
ENSG00000114388.12	NPRL2	protein_coding	2.35968	2.29813	0.0182907	9	9	63	chr3	50347488	50351091
ENSG00000144357.16	UBR3	protein_coding	-2.35951	-3.07512	0.0182991	11	12	103	chr2	169827458	170084131
ENSG00000108342.12	CSF3	protein_coding	2.35933	27.2004	0.018308	1	1	82	chr17	40015361	40017813
ENSG00000112245.10	PTP4A1	protein_coding	2.35812	28.4039	0.0183676	2	2	94	chr6	63521748	63583587
ENSG00000072274.12	TFRC	protein_coding	-2.35771	-4.88524	0.0183881	7	8	153	chr3	196027183	196082189
ENSG00000171612.6	SLC25A33	protein_coding	-2.35755	-2.32077	0.0183959	3	3	61	chr1	9539482	9585179
ENSG00000212643.2	ZRSR1	protein_coding	-2.35673	-10.2726	0.0184365	2	2	153	chr5	112891422	112893094
ENSG00000249947.2	XBP1P1	processed_pseudogene	2.35664	18.1122	0.018441	1	1	76	chr5	112885094	112885745
ENSG00000203804.4	ADAMTSL4-AS1	processed_transcript	2.35642	1.97713	0.0184522	2	2	86	chr1	150560895	150574552
ENSG00000204482.10	LST1	protein_coding	-2.35633	-1.30653	0.0184563	23	23	233	chr6	31586124	31588909
ENSG00000172086.7	KRCC1	protein_coding	2.35435	6.06104	0.0185551	4	7	101	chr2	88027205	88055729
ENSG00000107331.16	ABCA2	protein_coding	-2.35426	-7.5656	0.0185596	3	7	91	chr9	137007227	137028922
ENSG00000134243.11	SORT1	protein_coding	-2.35265	-6.43683	0.0186402	6	6	90	chr1	109309568	109397951
ENSG00000126705.13	AHDC1	protein_coding	2.35128	5.63339	0.0187089	7	7	82	chr1	27534035	27604431
ENSG00000176142.12	TMEM39A	protein_coding	2.35105	1.4264	0.0187206	16	16	133	chr3	119429500	119468830
ENSG00000204516.9	MICB	protein_coding	-2.35083	-0.375305	0.0187317	17	17	541	chr6	31494881	31511124
ENSG00000179859.9	AC025335.1	protein_coding	2.35074	1.54695	0.0187361	17	17	131	chr17	7913324	7916276
ENSG00000157593.18	SLC35B2	protein_coding	-2.35006	-2.83459	0.0187706	4	4	49	chr6	44254096	44257890
ENSG00000102738.7	MRPS31	protein_coding	2.34949	1.58529	0.0187994	8	8	72	chr13	40729135	40771173
ENSG00000196209.12	SIRPB2	protein_coding	2.34864	0.346048	0.018842	1	1	679	chr20	1470741	1491587
ENSG00000178726.6	THBD	protein_coding	-2.34717	-1.69675	0.0189166	9	9	76	chr20	23045633	23049741
ENSG00000162704.15	ARPC5	protein_coding	-2.34713	-0.304663	0.0189186	10	10	188	chr1	183620846	183635757
ENSG00000055163.19	CYFIP2	protein_coding	-2.34699	-1.17786	0.0189256	7	7	107	chr5	157266079	157395595
ENSG00000255933.1	RP11-495K9.5	lincRNA	-2.34585	-1.0362	0.018984	49	53	602	chr12	131756966	131758047
ENSG00000152894.14	PTPRK	protein_coding	-2.34579	-7.55342	0.018987	1	1	79	chr6	127968779	128520674
ENSG00000104687.12	GSR	protein_coding	2.34515	2.18758	0.0190195	6	8	116	chr8	30678061	30727926
ENSG00000185885.15	IFITM1	protein_coding	2.34383	1.1571	0.019087	23	25	182	chr11	313506	315272
ENSG00000198755.10	RPL10A	protein_coding	2.34062	0.422401	0.0192518	20	20	261	chr6	35468408	35470785
ENSG00000142784.15	WDTC1	protein_coding	-2.33996	-25.5517	0.019286	4	4	110	chr1	27234516	27308633
ENSG00000160229.11	ZNF66	protein_coding	-2.33838	-0.404408	0.0193673	2	2	231	chr19	20776304	20807322
ENSG00000211782.2	TRAV8-1	TR_V_gene	2.3382	0.274249	0.0193769	27	31	62	chr14	21797287	21797886
ENSG00000132170.19	PPARG	protein_coding	2.33674	2.15099	0.0194528	16	16	130	chr3	12287368	12434356
ENSG00000172270.18	BSG	protein_coding	-2.33642	-9.41968	0.0194694	4	5	150	chr19	571277	583493
ENSG00000100380.13	ST13	protein_coding	-2.33585	-1.26135	0.019499	4	4	105	chr22	40824535	40857022
ENSG00000176124.11	DLEU1	protein_coding	2.33583	1.16256	0.0195	16	16	153	chr13	50082171	50723236
ENSG00000163517.14	HDAC11	protein_coding	-2.33327	-1.79072	0.0196339	18	19	136	chr3	13479724	13506424
ENSG00000253506.2	NACA2	protein_coding	-2.33165	-3.57242	0.019719	5	5	108	chr17	61590426	61591202
ENSG00000186517.13	ARHGAP30	protein_coding	-2.33118	-4.35016	0.0197436	12	12	114	chr1	161046948	161069970
ENSG00000144455.13	SUMF1	protein_coding	2.32987	0.59102	0.0198128	14	14	536	chr3	3700814	4467281
ENSG00000119431.9	HDHD3	protein_coding	-2.32877	-0.420853	0.0198715	27	28	293	chr9	113373419	113376999
ENSG00000006530.15	AGK	protein_coding	2.32851	3.08411	0.0198852	6	6	183	chr7	141551189	141655244
ENSG00000173465.7	SSSCA1	protein_coding	-2.32821	-2.66212	0.0199011	6	6	69	chr11	65570430	65573942
ENSG00000127249.14	ATP13A4	protein_coding	-2.3277	-0.131438	0.0199281	5	5	614	chr3	193402077	193593111
ENSG00000130173.13	ANGPTL8	protein_coding	-2.32669	-182.713	0.019982	1	1	445	chr19	11237450	11241943
ENSG00000012124.16	CD22	protein_coding	2.32616	1.76866	0.0200098	16	18	216	chr19	35319261	35347355
ENSG00000119965.12	C10orf88	protein_coding	2.32561	0.358341	0.0200394	15	16	193	chr10	122930903	122954403
ENSG00000116761.11	CTH	protein_coding	2.32474	1.31817	0.0200857	2	2	124	chr1	70411218	70439851
ENSG00000204282.4	TNRC6C-AS1	processed_transcript	-2.32468	-4.64354	0.0200888	2	2	214	chr17	78107398	78111799
ENSG00000233930.3	KRTAP5-AS1	antisense	2.32467	0.368285	0.0200895	4	4	637	chr11	1571353	1599184
ENSG00000138119.16	MYOF	protein_coding	2.32409	0.66843	0.0201204	22	22	252	chr10	93306429	93482317
ENSG00000109919.9	MTCH2	protein_coding	2.32322	1.95443	0.0201672	5	5	148	chr11	47617315	47642623
ENSG00000142065.13	ZFP14	protein_coding	2.32299	2.55127	0.0201799	6	6	113	chr19	36334453	36379199
ENSG00000172247.3	C1QTNF4	protein_coding	-2.32229	-0.142948	0.0202175	5	5	255	chr11	47589664	47594659
ENSG00000175793.11	SFN	protein_coding	2.32222	2.4072	0.0202209	7	7	68	chr1	26863138	26864457
ENSG00000087111.20	PIGS	protein_coding	2.32093	10.3336	0.0202906	5	5	89	chr17	28553383	28571872
ENSG00000103710.10	RASL12	protein_coding	-2.32017	-1.90811	0.0203317	9	9	108	chr15	65053337	65076690
ENSG00000172053.17	QARS	protein_coding	2.31919	23.5108	0.020385	5	5	81	chr3	49095932	49105135
ENSG00000126262.4	FFAR2	protein_coding	-2.31917	-10.3218	0.020386	1	1	591	chr19	35443907	35451767
ENSG00000100372.14	SLC25A17	protein_coding	-2.31864	-2.23531	0.0204145	6	6	125	chr22	40769630	40819399
ENSG00000212283.1	SNORD89	snoRNA	2.31855	0.705111	0.0204192	7	7	277	chr2	101272936	101273049
ENSG00000132581.9	SDF2	protein_coding	2.31481	11.4486	0.0206232	3	3	45	chr17	28648356	28662189
ENSG00000197343.10	ZNF655	protein_coding	-2.31418	-5.00899	0.0206576	8	8	104	chr7	99558406	99576453
ENSG00000129625.12	REEP5	protein_coding	-2.31412	-0.350417	0.0206611	12	12	241	chr5	112876379	112922539
ENSG00000245954.6	RP11-18H21.1	lincRNA	-2.31382	-0.230357	0.0206775	22	22	408	chr4	152100754	152104720
ENSG00000213277.3	MARCKSL1P1	processed_pseudogene	2.31296	0.460647	0.020725	22	23	268	chr10	103175554	103176094
ENSG00000140263.13	SORD	protein_coding	2.3121	0.888554	0.020772	18	19	121	chr15	45023104	45077185
ENSG00000167244.18	IGF2	protein_coding	-2.31177	-2.99948	0.0207904	8	9	59	chr11	2129112	2141238
ENSG00000181585.3	TMIE	protein_coding	2.30914	0.672528	0.0209355	30	30	422	chr3	46701333	46710886
ENSG00000165731.18	RET	protein_coding	-2.30832	-1.14326	0.0209813	25	25	574	chr10	43077027	43130351
ENSG00000135124.14	P2RX4	protein_coding	-2.30792	-0.140041	0.0210038	22	22	314	chr12	121209857	121234106
ENSG00000038210.12	PI4K2B	protein_coding	2.30695	1.50762	0.0210578	12	12	180	chr4	25233975	25279092
ENSG00000197859.9	ADAMTSL2	protein_coding	-2.30644	-4.52314	0.021086	1	1	697	chr9	133532164	133575519
ENSG00000173597.8	SULT1B1	protein_coding	2.30626	1.69006	0.0210959	2	2	601	chr4	69721162	69787961
ENSG00000189079.15	ARID2	protein_coding	2.30469	2.44698	0.0211839	7	7	101	chr12	45729665	45908040
ENSG00000157349.16	DDX19B	protein_coding	2.30387	2.2371	0.0212297	8	8	103	chr16	70289663	70335283
ENSG00000248858.7	FLJ46284	processed_transcript	2.30216	133.524	0.021326	1	1	442	chr8	92699742	92879502
ENSG00000169217.8	CD2BP2	protein_coding	2.30113	3.91214	0.0213841	5	5	84	chr16	30350766	30355361
ENSG00000214803.3	RP11-37N22.1	lincRNA	2.30071	2.17765	0.0214078	13	15	202	chr8	124192671	124247398
ENSG00000234750.1	CTD-2666L21.2	processed_pseudogene	-2.30036	-3.78001	0.0214278	4	4	402	chr19	12284337	12285185
ENSG00000111405.8	ENDOU	protein_coding	-2.2995	-0.845132	0.0214765	11	12	144	chr12	47709734	47725567
ENSG00000245025.2	RP11-875O11.1	antisense	-2.29909	-10.5734	0.0215	1	1	214	chr8	22984596	23019335
ENSG00000111341.9	MGP	protein_coding	2.29546	4.05195	0.0217068	8	10	89	chr12	14881181	14885926
ENSG00000040633.12	PHF23	protein_coding	-2.29417	-2.81505	0.0217805	7	7	61	chr17	7235028	7239722
ENSG00000142733.14	MAP3K6	protein_coding	2.29395	1.85018	0.0217936	4	4	204	chr1	27355184	27366892
ENSG00000225886.3	RP11-288L9.4	antisense	-2.29355	-1.55847	0.0218166	22	22	379	chr1	27669468	27703063
ENSG00000198799.11	LRIG2	protein_coding	-2.29207	-3.20642	0.0219016	8	8	99	chr1	113073209	113132260
ENSG00000233560.2	KRT8P39	processed_pseudogene	-2.29119	-0.529057	0.0219527	47	49	432	chr12	68705634	68707066
ENSG00000134184.12	GSTM1	protein_coding	2.28946	0.22639	0.0220524	36	38	321	chr1	109687814	109709039
ENSG00000186283.13	TOR3A	protein_coding	-2.28922	-0.237809	0.0220668	22	22	201	chr1	179081377	179098023
ENSG00000065150.18	IPO5	protein_coding	2.2892	3.10168	0.0220676	7	7	53	chr13	97953658	98024297
ENSG00000138385.15	SSB	protein_coding	-2.28862	-4.74308	0.0221015	7	7	99	chr2	169791933	169812064
ENSG00000139574.8	NPFF	protein_coding	2.28801	3.39137	0.0221372	7	7	74	chr12	53506690	53507638
ENSG00000102974.14	CTCF	protein_coding	-2.28558	-3.81334	0.0222787	5	5	84	chr16	67562407	67639183
ENSG00000198563.13	DDX39B	protein_coding	2.28528	1.19258	0.0222962	26	30	192	chr6	31530219	31542448
ENSG00000188404.8	SELL	protein_coding	2.28283	1.87393	0.0224405	4	4	82	chr1	169690667	169711698
ENSG00000141378.14	PTRH2	protein_coding	-2.28162	-2.90214	0.0225116	6	6	82	chr17	59674636	59707626
ENSG00000164406.7	LEAP2	protein_coding	-2.28061	-2.92741	0.0225716	8	8	61	chr5	132872322	132875046
ENSG00000125730.16	C3	protein_coding	-2.27917	-0.925997	0.0226572	9	9	86	chr19	6677704	6730562
ENSG00000159348.12	CYB5R1	protein_coding	-2.27906	-5.32836	0.0226635	5	5	74	chr1	202961869	202967280
ENSG00000162747.9	FCGR3B	protein_coding	2.27848	4.20434	0.022698	3	3	125	chr1	161623196	161631963
ENSG00000260121.1	RP5-1142A6.9	antisense	2.27753	0.999922	0.0227545	24	25	194	chr16	88718615	88720459
ENSG00000101104.12	PABPC1L	protein_coding	-2.27706	-0.493833	0.0227828	2	2	258	chr20	44910062	44959035
ENSG00000174840.8	PDE12	protein_coding	-2.27618	-5.77294	0.022835	8	8	108	chr3	57556276	57566844
ENSG00000157216.15	SSBP3	protein_coding	2.27508	3.64524	0.022901	4	4	87	chr1	54225432	54413479
ENSG00000223668.1	EEF1A1P24	processed_pseudogene	-2.27439	-2.21644	0.0229424	20	20	439	chr3	39358545	39359922
ENSG00000220161.4	LINC02076	lincRNA	-2.27312	-0.387669	0.0230193	25	26	356	chr17	18411159	18414380
ENSG00000161011.19	SQSTM1	protein_coding	-2.27258	-10.3914	0.0230512	4	5	94	chr5	179806398	179838078
ENSG00000136960.12	ENPP2	protein_coding	2.27106	0.568029	0.0231435	10	10	72	chr8	119557086	119673453
ENSG00000114790.12	ARHGEF26	protein_coding	-2.27037	-0.832691	0.0231852	9	9	182	chr3	154121003	154257827
ENSG00000135426.15	TESPA1	protein_coding	-2.26942	-1.59142	0.0232426	5	5	528	chr12	54948018	54984746
ENSG00000142408.4	CACNG8	protein_coding	-2.26761	-0.66927	0.0233529	37	42	975	chr19	53963040	53990215
ENSG00000110497.14	AMBRA1	protein_coding	-2.26756	-3.0838	0.0233563	9	9	64	chr11	46396414	46594125
ENSG00000138311.15	ZNF365	protein_coding	-2.2666	-0.554379	0.0234145	14	14	569	chr10	62374192	62672011
ENSG00000055208.18	TAB2	protein_coding	-2.26637	-7.29734	0.023429	4	4	120	chr6	149218641	149411613
ENSG00000229117.8	RPL41	protein_coding	2.26568	3.32187	0.0234709	6	6	65	chr12	56116586	56117943
ENSG00000198182.12	ZNF607	protein_coding	2.26409	0.459896	0.0235684	22	22	275	chr19	37696363	37719790
ENSG00000224129.1	DPPA2P2	processed_pseudogene	2.26386	0.361135	0.0235825	7	7	19	chr1	26519354	26520250
ENSG00000223648.4	IGHV3-64	IG_V_gene	2.26369	2.64709	0.0235929	5	10	156	chr14	106657725	106658258
ENSG00000164949.7	GEM	protein_coding	2.26332	9.31481	0.023616	1	1	102	chr8	94249253	94262350
ENSG00000087253.12	LPCAT2	protein_coding	2.26147	1.80219	0.02373	1	1	144	chr16	55508998	55586670
ENSG00000126464.13	PRR12	protein_coding	-2.26065	-0.787835	0.0237808	24	26	218	chr19	49591643	49626439
ENSG00000101336.13	HCK	protein_coding	-2.26027	-5.52618	0.0238046	6	6	84	chr20	32052188	32101856
ENSG00000213927.3	CCL27	protein_coding	-2.26	-8.21219	0.023821	2	2	100	chr9	34661880	34664048
ENSG00000116106.11	EPHA4	protein_coding	2.2579	4.23327	0.0239521	9	10	157	chr2	221418027	221574202
ENSG00000173230.15	GOLGB1	protein_coding	2.25778	7.81472	0.0239596	2	2	115	chr3	121663199	121749767
ENSG00000101400.5	SNTA1	protein_coding	2.25703	3.52244	0.0240062	5	5	80	chr20	33407955	33443892
ENSG00000166856.2	GPR182	protein_coding	2.25621	1.7165	0.0240578	20	22	363	chr12	56994446	56998441
ENSG00000197714.8	ZNF460	protein_coding	-2.25606	-2.76935	0.0240668	4	4	42	chr19	57280051	57293569
ENSG00000138829.11	FBN2	protein_coding	-2.2554	-0.214228	0.0241081	23	23	541	chr5	128257909	128659185
ENSG00000144747.15	TMF1	protein_coding	2.25514	8.45625	0.0241244	5	5	155	chr3	69019827	69052303
ENSG00000259436.1	CTC-378H22.2	antisense	-2.25471	-3.03158	0.0241517	26	32	553	chr19	42152569	42157523
ENSG00000103502.13	CDIPT	protein_coding	-2.25353	-3.70013	0.024226	3	3	75	chr16	29858357	29863736
ENSG00000160013.8	PTGIR	protein_coding	-2.25132	-2.34699	0.024365	5	5	46	chr19	46620468	46625118
ENSG00000101132.9	PFDN4	protein_coding	-2.25119	-1.56697	0.0243735	7	8	58	chr20	54207847	54228052
ENSG00000111752.10	PHC1	protein_coding	2.25102	96.9425	0.024384	1	1	222	chr12	8913896	8941467
ENSG00000107829.13	FBXW4	protein_coding	-2.25057	-4.5557	0.024413	4	4	92	chr10	101610664	101695295
ENSG00000183665.5	TRMT12	protein_coding	-2.25032	-0.0698209	0.0244284	3	3	159	chr8	124450820	124462150
ENSG00000196811.11	CHRNG	protein_coding	-2.24758	-9.14672	0.024603	6	6	213	chr2	232539727	232546403
ENSG00000153827.13	TRIP12	protein_coding	-2.24747	-28.645	0.0246099	2	2	105	chr2	229763838	229923239
ENSG00000151327.12	FAM177A1	protein_coding	2.24722	0.218579	0.0246263	9	9	283	chr14	35044907	35113130
ENSG00000100591.7	AHSA1	protein_coding	2.24689	1.90993	0.0246469	2	2	126	chr14	77457870	77469474
ENSG00000171121.16	KCNMB3	protein_coding	-2.24595	-0.384725	0.0247074	11	14	183	chr3	179236691	179267002
ENSG00000089220.4	PEBP1	protein_coding	-2.24565	-0.694824	0.0247267	19	21	192	chr12	118135858	118145584
ENSG00000119596.17	YLPM1	protein_coding	-2.24474	-7.73382	0.0247846	4	4	101	chr14	74763366	74859435
ENSG00000204618.8	RNF39	protein_coding	2.24344	0.37296	0.0248682	14	15	355	chr6	30070266	30075887
ENSG00000179344.16	HLA-DQB1	protein_coding	2.2424	0.097207	0.0249355	8	8	612	chr6	32659467	32668383
ENSG00000123200.16	ZC3H13	protein_coding	-2.24216	-2.45201	0.024951	1	1	127	chr13	45954465	46052759
ENSG00000182993.3	C12orf60	protein_coding	-2.23976	-0.488345	0.0251063	7	7	194	chr12	14803572	14906586
ENSG00000165923.15	AGBL2	protein_coding	-2.23919	-2.95436	0.0251438	20	20	436	chr11	47659591	47715389
ENSG00000260528.4	FAM157C	lincRNA	2.23823	0.207409	0.025206	1	2	266	chr16	90102271	90178344
ENSG00000159199.13	ATP5G1	protein_coding	-2.23803	-2.151	0.0252192	12	12	144	chr17	48892765	48895871
ENSG00000181450.17	ZNF678	protein_coding	2.23761	2.08304	0.0252467	9	9	100	chr1	227563543	227677443
ENSG00000122565.18	CBX3	protein_coding	2.23637	12.3308	0.0253277	5	5	45	chr7	26201162	26213356
ENSG00000137959.15	IFI44L	protein_coding	2.23395	1.87885	0.0254862	3	3	102	chr1	78619922	78646145
ENSG00000257267.3	ZNF271P	transcribed_unitary_pseudogene	2.2338	2.84592	0.025496	1	1	108	chr18	35290282	35328390
ENSG00000095932.6	SMIM24	protein_coding	2.23356	3.03307	0.025512	1	1	808	chr19	3473986	3480542
ENSG00000186132.14	C2orf76	protein_coding	2.23223	0.871136	0.0256001	11	11	83	chr2	119302225	119366828
ENSG00000090097.21	PCBP4	protein_coding	2.23206	26.8441	0.0256113	4	4	70	chr3	51957454	51974016
ENSG00000174255.6	ZNF80	protein_coding	2.23144	1.46362	0.0256521	8	8	294	chr3	114234631	114237578
ENSG00000198830.10	HMGN2	protein_coding	2.22948	1.20492	0.0257821	14	15	148	chr1	26472450	26475972
ENSG00000260366.1	CTD-2639E6.4	sense_overlapping	-2.22791	-0.903881	0.0258866	26	26	365	chr19	48926171	48926444
ENSG00000005339.14	CREBBP	protein_coding	2.22609	4.40453	0.0260084	9	9	89	chr16	3725054	3880726
ENSG00000004777.18	ARHGAP33	protein_coding	-2.22489	-0.705739	0.0260884	14	14	192	chr19	35774532	35788822
ENSG00000205423.11	CNEP1R1	protein_coding	2.22471	13.0234	0.0261007	6	6	75	chr16	50024410	50037088
ENSG00000169403.11	PTAFR	protein_coding	2.22429	2.07511	0.0261291	10	10	112	chr1	28147166	28193936
ENSG00000214894.6	LINC00243	lincRNA	-2.22329	-0.199288	0.0261962	40	43	665	chr6	30798654	30830659
ENSG00000211973.2	IGHV1-69	IG_V_gene	-2.22265	-2.8108	0.0262397	4	7	178	chr14	106714684	106715181
ENSG00000247903.1	RP11-421F16.3	antisense	2.22163	0.219504	0.0263083	20	22	409	chr12	26971586	26979582
ENSG00000255185.5	PDXDC2P	transcribed_unprocessed_pseudogene	2.22135	0.172925	0.026327	13	13	386	chr16	70010751	70065945
ENSG00000153574.8	RPIA	protein_coding	-2.22062	-613.971	0.026377	1	1	145	chr2	88691644	88750935
ENSG00000102908.20	NFAT5	protein_coding	-2.22055	-6.02824	0.0263814	6	6	75	chr16	69565094	69704666
ENSG00000008517.16	IL32	protein_coding	2.22032	0.843547	0.0263971	18	18	205	chr16	3065297	3082192
ENSG00000083720.12	OXCT1	protein_coding	2.2188	2.02082	0.0265003	13	13	117	chr5	41730065	41870519
ENSG00000175106.16	TVP23C	protein_coding	-2.21795	-2.21426	0.0265584	14	15	231	chr17	15502264	15563595
ENSG00000122756.14	CNTFR	protein_coding	2.21675	3.68687	0.02664	4	4	64	chr9	34551432	34590140
ENSG00000137804.12	NUSAP1	protein_coding	2.21614	4.48716	0.0266816	7	7	197	chr15	41332694	41381050
ENSG00000151881.14	TMEM267	protein_coding	-2.21439	-3.24865	0.0268019	7	7	131	chr5	43444252	43483893
ENSG00000162745.10	OLFML2B	protein_coding	-2.2133	-5.19443	0.0268769	7	7	81	chr1	161983192	162023854
ENSG00000125772.12	GPCPD1	protein_coding	-2.21323	-7.54796	0.026882	1	1	151	chr20	5544404	5611026
ENSG00000186496.10	ZNF396	protein_coding	-2.21271	-1.4016	0.0269179	13	13	181	chr18	35366697	35377337
ENSG00000066583.11	ISOC1	protein_coding	-2.21231	-0.304295	0.0269455	8	8	122	chr5	129094751	129114028
ENSG00000100478.14	AP4S1	protein_coding	-2.21178	-0.78158	0.0269819	8	8	134	chr14	31025106	31096450
ENSG00000267049.1	AC002398.13	antisense	-2.21051	-0.853806	0.0270696	2	2	145	chr19	35769144	35771028
ENSG00000118263.14	KLF7	protein_coding	2.2105	9.10554	0.0270703	4	4	72	chr2	207074137	207167267
ENSG00000121481.10	RNF2	protein_coding	-2.20833	-2.09345	0.0272216	12	12	138	chr1	185045364	185102608
ENSG00000182150.15	ERCC6L2	protein_coding	2.20734	0.253475	0.0272903	20	20	280	chr9	95875701	96014571
ENSG00000169752.16	NRG4	protein_coding	2.20726	0.843098	0.027296	14	14	186	chr15	75935969	76059795
ENSG00000225855.6	RUSC1-AS1	antisense	-2.20715	-0.47395	0.0273035	24	24	190	chr1	155316863	155324176
ENSG00000245149.3	RNF139-AS1	lincRNA	-2.20555	-0.885072	0.0274154	2	2	119	chr8	124462485	124474576
ENSG00000114654.7	EFCC1	protein_coding	-2.20554	-1.91414	0.027416	1	1	418	chr3	129001629	129040742
ENSG00000073969.18	NSF	protein_coding	2.20541	1.09029	0.0274252	14	14	146	chr17	46590669	46757464
ENSG00000170191.4	NANP	protein_coding	-2.20497	-0.706002	0.0274565	10	10	121	chr20	25612935	25624175
ENSG00000085274.15	MYNN	protein_coding	2.2027	4.05604	0.0276161	3	3	74	chr3	169772831	169789716
ENSG00000174886.12	NDUFA11	protein_coding	-2.20143	-0.666566	0.0277053	15	15	230	chr19	5891276	5904006
ENSG00000162227.7	TAF6L	protein_coding	2.201	21.4982	0.0277363	7	7	83	chr11	62771303	62787342
ENSG00000047662.4	FAM184B	protein_coding	2.20044	3.6441	0.0277759	2	2	609	chr4	17629306	17781512
ENSG00000169896.16	ITGAM	protein_coding	-2.19995	-3.1413	0.0278106	3	3	68	chr16	31259990	31332892
ENSG00000168286.2	THAP11	protein_coding	2.19685	4.67234	0.0280313	6	6	71	chr16	67842082	67844195
ENSG00000245598.6	DACT3-AS1	antisense	2.19583	1.19977	0.0281038	3	3	559	chr19	46660364	46677447
ENSG00000256039.1	RP11-291B21.2	lincRNA	-2.19542	-0.846131	0.0281332	25	25	424	chr12	10553363	10558049
ENSG00000187555.14	USP7	protein_coding	2.19513	2.37253	0.0281546	10	11	96	chr16	8892094	8964514
ENSG00000237172.3	B3GNT9	protein_coding	2.19453	0.418707	0.0281975	8	8	159	chr16	67148105	67151214
ENSG00000198556.13	ZNF789	protein_coding	-2.1942	-3.68778	0.0282211	7	7	84	chr7	99472841	99503650
ENSG00000117143.13	UAP1	protein_coding	-2.19372	-9.10684	0.0282556	4	4	82	chr1	162561506	162599842
ENSG00000174738.12	NR1D2	protein_coding	-2.19291	-26.9122	0.028314	1	1	62	chr3	23945260	23980618
ENSG00000065618.18	COL17A1	protein_coding	2.19175	2.83689	0.0283979	8	8	52	chr10	104031286	104086002
ENSG00000106018.13	VIPR2	protein_coding	2.19153	8.00857	0.0284135	4	4	465	chr7	159028175	159144957
ENSG00000205702.10	CYP2D7	polymorphic_pseudogene	-2.19113	-0.181796	0.0284421	32	32	405	chr22	42140203	42144577
ENSG00000168496.3	FEN1	protein_coding	-2.18992	-3.32423	0.0285301	4	4	84	chr11	61792637	61797244
ENSG00000164081.12	TEX264	protein_coding	-2.18945	-0.984317	0.0285642	12	12	200	chr3	51662693	51704323
ENSG00000246100.3	LINC00900	lincRNA	-2.18862	-0.659444	0.0286247	13	13	527	chr11	115754248	115760627
ENSG00000104064.16	GABPB1	protein_coding	-2.18832	-6.50463	0.0286462	6	6	209	chr15	50275392	50355408
ENSG00000064726.9	BTBD1	protein_coding	2.18783	1.37557	0.0286821	19	19	177	chr15	83016422	83067354
ENSG00000175061.17	LRRC75A-AS1	processed_transcript	-2.18763	-3.20302	0.0286962	8	9	188	chr17	16438822	16478678
ENSG00000138069.16	RAB1A	protein_coding	-2.18626	-7.76153	0.0287968	5	5	82	chr2	65070701	65130106
ENSG00000152620.12	NADK2	protein_coding	-2.18415	-1.24181	0.0289515	6	6	85	chr5	36192592	36242279
ENSG00000051009.10	FAM160A2	protein_coding	2.18387	1.94232	0.0289716	13	14	171	chr11	6211335	6234711
ENSG00000083845.8	RPS5	protein_coding	2.18223	1.93433	0.0290926	2	2	161	chr19	58386400	58394806
ENSG00000130695.14	CEP85	protein_coding	2.1817	0.343514	0.0291318	16	18	238	chr1	26234153	26279038
ENSG00000118971.7	CCND2	protein_coding	2.18154	4.12009	0.0291434	13	14	141	chr12	4273772	4305350
ENSG00000234509.1	AP000253.1	lincRNA	2.18128	15.8416	0.029163	1	1	547	chr21	31653593	31659500
ENSG00000151687.14	ANKAR	protein_coding	2.18112	4.20055	0.0291746	4	4	104	chr2	189674290	189761193
ENSG00000232118.2	BACH1-AS1	lincRNA	2.18111	0.516357	0.029175	14	14	242	chr21	29370019	29376339
ENSG00000197535.14	MYO5A	protein_coding	-2.18044	-1.0706	0.0292249	11	11	185	chr15	52307283	52529050
ENSG00000177169.9	ULK1	protein_coding	-2.18002	-4.66828	0.0292559	4	5	96	chr12	131894651	131923167
ENSG00000183723.12	CMTM4	protein_coding	2.17995	40.8678	0.0292612	2	2	80	chr16	66614750	66696707
ENSG00000085491.15	SLC25A24	protein_coding	2.17968	0.255734	0.0292815	8	8	235	chr1	108134036	108200849
ENSG00000159885.13	ZNF222	protein_coding	2.17939	7.37704	0.0293025	9	10	99	chr19	44025342	44033112
ENSG00000245958.6	RP11-33B1.1	transcribed_unprocessed_pseudogene	2.17917	0.104879	0.0293189	11	11	461	chr4	119454791	119552025
ENSG00000164080.13	RAD54L2	protein_coding	2.17831	2.13801	0.0293829	14	15	202	chr3	51541580	51668667
ENSG00000115806.12	GORASP2	protein_coding	2.17777	2.73244	0.0294229	13	13	113	chr2	170928464	170967129
ENSG00000163463.11	KRTCAP2	protein_coding	2.17724	4.30354	0.0294623	9	9	59	chr1	155169408	155173475
ENSG00000113269.13	RNF130	protein_coding	2.17674	2.00885	0.0295001	20	23	310	chr5	179911651	180072118
ENSG00000105974.11	CAV1	protein_coding	2.17644	2.60463	0.0295221	5	5	123	chr7	116524785	116561184
ENSG00000172757.12	CFL1	protein_coding	2.17563	3.39115	0.0295826	7	7	98	chr11	65823022	65862026
ENSG00000184897.5	H1FX	protein_coding	2.17543	2.84053	0.0295982	5	5	50	chr3	129314771	129316277
ENSG00000117266.15	CDK18	protein_coding	-2.17536	-5.75532	0.0296035	8	8	82	chr1	205504595	205532793
ENSG00000185986.11	SDHAP3	transcribed_unprocessed_pseudogene	-2.17535	-0.136768	0.0296042	44	48	428	chr5	1572222	1594620
ENSG00000139318.7	DUSP6	protein_coding	2.17528	3.35938	0.0296093	5	6	65	chr12	89347232	89353271
ENSG00000231475.3	IGHV4-31	IG_V_gene	-2.17388	-1.01985	0.0297141	11	21	300	chr14	106349283	106349792
ENSG00000213190.3	MLLT11	protein_coding	2.17366	2.10228	0.0297304	13	14	157	chr1	151057758	151068497
ENSG00000105967.15	TFEC	protein_coding	-2.1731	-5.39699	0.0297725	21	21	543	chr7	115935148	116159896
ENSG00000065135.10	GNAI3	protein_coding	-2.17281	-28.6626	0.0297949	2	2	86	chr1	109548611	109618321
ENSG00000095319.14	NUP188	protein_coding	-2.17259	-4.27113	0.0298114	12	12	114	chr9	128947699	129007096
ENSG00000163320.10	CGGBP1	protein_coding	2.17179	0.971512	0.0298717	11	12	392	chr3	88051944	88149885
ENSG00000127220.5	ABHD8	protein_coding	-2.17106	-1.83512	0.0299268	15	15	201	chr19	17292131	17310236
ENSG00000223553.6	SMPD4P1	transcribed_unprocessed_pseudogene	-2.17086	-2.0048	0.0299417	6	8	192	chr22	20602595	20656914
ENSG00000164530.13	PI16	protein_coding	-2.17082	-2.06782	0.0299449	4	4	136	chr6	36948263	36964837
ENSG00000130045.15	NXNL2	protein_coding	-2.17029	-297.291	0.029985	1	1	617	chr9	88535101	88584274
ENSG00000044459.14	CNTLN	protein_coding	2.16987	0.233892	0.0300171	22	22	255	chr9	17134982	17503923
ENSG00000177674.15	AGTRAP	protein_coding	2.16969	1.7656	0.0300302	17	18	244	chr1	11736084	11754802
ENSG00000223561.6	AC003090.1	lincRNA	-2.16896	-19.938	0.0300857	3	3	541	chr7	25593351	25750994
ENSG00000104365.13	IKBKB	protein_coding	2.16882	3.67569	0.0300964	7	7	160	chr8	42271302	42332653
ENSG00000100325.14	ASCC2	protein_coding	-2.16756	-1.96592	0.0301922	20	20	164	chr22	29788608	29838304
ENSG00000237296.9	SMG1P1	transcribed_unprocessed_pseudogene	-2.16737	-0.300285	0.0302068	22	22	355	chr16	22437008	22492220
ENSG00000113319.12	RASGRF2	protein_coding	-2.16333	-3.17834	0.0305161	8	8	116	chr5	80960672	81230156
ENSG00000184208.10	C22orf46	protein_coding	2.16249	8.80115	0.0305805	3	3	38	chr22	41688939	41698136
ENSG00000179295.17	PTPN11	protein_coding	-2.16145	-22.942	0.0306603	2	2	58	chr12	112418351	112509913
ENSG00000108349.16	CASC3	protein_coding	-2.1613	-1.83346	0.0306721	6	6	252	chr17	40140323	40172183
ENSG00000163121.9	NEURL3	protein_coding	2.16129	3.43057	0.0306727	2	2	274	chr2	96497643	96508109
ENSG00000117868.15	ESYT2	protein_coding	-2.16079	-0.475623	0.0307113	16	17	264	chr7	158730995	158830253
ENSG00000134627.11	PIWIL4	protein_coding	-2.15938	-269.176	0.030821	1	1	101	chr11	94543840	94621421
ENSG00000110318.13	CEP126	protein_coding	-2.15864	-1.23028	0.0308779	33	33	574	chr11	101915015	102001058
ENSG00000263982.1	RP11-504I13.3	antisense	-2.15819	-1.01618	0.0309131	36	38	445	chr18	76372717	76378275
ENSG00000150540.13	HNMT	protein_coding	-2.15724	-2.94793	0.030987	10	10	113	chr2	137964020	138016364
ENSG00000140284.10	SLC27A2	protein_coding	-2.15718	-0.878613	0.0309917	29	30	452	chr15	50182196	50236395
ENSG00000073605.18	GSDMB	protein_coding	-2.15606	-0.158659	0.0310787	3	3	211	chr17	39904595	39918650
ENSG00000167985.6	SDHAF2	protein_coding	2.15582	3.94559	0.0310977	16	16	174	chr11	61430042	61447529
ENSG00000166435.15	XRRA1	protein_coding	-2.15571	-0.045881	0.0311064	4	4	465	chr11	74807739	74949200
ENSG00000124523.15	SIRT5	protein_coding	2.15528	243.829	0.03114	1	1	181	chr6	13574529	13615158
ENSG00000064999.13	ANKS1A	protein_coding	-2.15485	-10.03	0.0311733	6	6	124	chr6	34889265	35091413
ENSG00000163938.16	GNL3	protein_coding	-2.15453	-0.948329	0.0311988	3	3	161	chr3	52681156	52694492
ENSG00000185129.5	PURA	protein_coding	2.15392	4.53553	0.0312462	5	5	61	chr5	140107777	140125619
ENSG00000182141.10	ZNF708	protein_coding	-2.15385	-0.223814	0.0312516	15	17	260	chr19	21291160	21329425
ENSG00000112992.16	NNT	protein_coding	-2.15313	-0.633953	0.0313083	12	12	242	chr5	43602692	43707405
ENSG00000112182.14	BACH2	protein_coding	-2.15296	-99.6278	0.031322	1	1	44	chr6	89926529	90296908
ENSG00000173517.10	PEAK1	protein_coding	2.15076	0.417823	0.0314955	10	12	262	chr15	77100656	77420144
ENSG00000225484.6	NUTM2B-AS1	antisense	-2.15005	-0.65769	0.0315511	20	22	429	chr10	79663088	79826594
ENSG00000169902.13	TPST1	protein_coding	2.14937	1.27672	0.0316052	13	13	172	chr7	66205199	66420543
ENSG00000174442.11	ZWILCH	protein_coding	2.14929	3.83941	0.0316115	6	6	69	chr15	66504959	66550128
ENSG00000197019.4	SERTAD1	protein_coding	-2.1491	-3.02914	0.0316262	3	4	78	chr19	40421592	40426025
ENSG00000163125.15	RPRD2	protein_coding	-2.14856	-3.11381	0.0316695	6	6	138	chr1	150363091	150476566
ENSG00000211638.2	IGLV8-61	IG_V_gene	2.14678	0.250556	0.0318106	20	21	364	chr22	22098700	22099212
ENSG00000113552.15	GNPDA1	protein_coding	2.14667	1.1663	0.0318199	16	16	136	chr5	141991749	142013041
ENSG00000103264.17	FBXO31	protein_coding	2.14648	0.532429	0.0318343	11	11	219	chr16	87326987	87392142
ENSG00000108219.14	TSPAN14	protein_coding	2.14608	0.739278	0.0318665	11	11	212	chr10	80454166	80533123
ENSG00000215256.3	DHRS4-AS1	antisense	2.14604	0.635837	0.0318694	17	18	178	chr14	23938731	23988839
ENSG00000130772.13	MED18	protein_coding	2.14484	3.18928	0.0319654	3	3	48	chr1	28329002	28335967
ENSG00000004776.12	HSPB6	protein_coding	2.14388	2.321	0.0320426	8	8	63	chr19	35754569	35758079
ENSG00000164053.19	ATRIP	protein_coding	2.14358	0.356205	0.0320664	12	12	166	chr3	48446710	48465716
ENSG00000112294.12	ALDH5A1	protein_coding	2.14341	0.895967	0.0320801	13	13	205	chr6	24494852	24537207
ENSG00000176845.12	METRNL	protein_coding	-2.14328	-2.40822	0.0320903	13	14	152	chr17	83079691	83095119
ENSG00000242472.1	IGHJ5	IG_J_gene	-2.14255	-5.84503	0.0321489	6	8	322	chr14	105863814	105863862
ENSG00000108733.9	PEX12	protein_coding	2.14221	1.51229	0.0321767	5	6	77	chr17	35574795	35578863
ENSG00000140395.8	WDR61	protein_coding	2.14217	0.929172	0.0321795	9	9	84	chr15	78277835	78299794
ENSG00000178802.17	MPI	protein_coding	-2.14212	-0.240493	0.0321835	9	9	192	chr15	74890005	74902219
ENSG00000211946.3	IGHV3-20	IG_V_gene	-2.1408	-0.134179	0.0322904	8	17	300	chr14	106210936	106211453
ENSG00000101266.17	CSNK2A1	protein_coding	2.14054	69.6417	0.032311	1	1	86	chr20	473591	543821
ENSG00000186687.15	LYRM7	protein_coding	2.14023	2.00443	0.0323366	4	4	86	chr5	131170810	131205426
ENSG00000227688.2	HNRNPA3P2	unprocessed_pseudogene	2.1387	0.208247	0.0324597	16	18	47	chr20	36620403	36621423
ENSG00000148450.12	MSRB2	protein_coding	-2.13621	-0.926548	0.0326622	12	12	109	chr10	23095506	23122013
ENSG00000156097.12	GPR61	protein_coding	-2.13587	-1.35305	0.0326898	11	12	86	chr1	109539872	109548406
ENSG00000104808.7	DHDH	protein_coding	2.13543	9.40809	0.032726	1	1	102	chr19	48933682	48944969
ENSG00000177311.11	ZBTB38	protein_coding	-2.13407	-0.44447	0.0328374	4	4	176	chr3	141324213	141449792
ENSG00000139631.18	CSAD	protein_coding	2.13352	1.18243	0.032882	19	19	119	chr12	53157663	53180909
ENSG00000164253.13	WDR41	protein_coding	2.13311	0.34113	0.0329158	24	27	371	chr5	77425970	77620611
ENSG00000213722.8	DDAH2	protein_coding	2.13228	1.30421	0.032984	8	8	204	chr6	31727038	31730617
ENSG00000151151.5	IPMK	protein_coding	-2.13189	-0.518916	0.0330156	4	4	86	chr10	58191517	58267934
ENSG00000185689.15	C6orf201	protein_coding	2.13155	1.82259	0.0330437	4	4	302	chr6	4079209	4130951
ENSG00000090565.15	RAB11FIP3	protein_coding	-2.13116	-17.2185	0.0330758	3	3	114	chr16	425619	523011
ENSG00000204758.7	CTC-308K20.1	antisense	-2.13082	-3.23497	0.0331038	2	2	182	chr5	172954786	172959392
ENSG00000078699.21	CBFA2T2	protein_coding	2.1304	47.9478	0.0331383	2	2	110	chr20	33490075	33650036
ENSG00000172340.14	SUCLG2	protein_coding	2.12897	0.238032	0.0332569	23	23	315	chr3	67360460	67654614
ENSG00000198862.13	LTN1	protein_coding	-2.12739	-3.24915	0.0333876	12	12	134	chr21	28928144	28992956
ENSG00000048140.17	TSPAN17	protein_coding	-2.12683	-1.06137	0.0334341	7	7	129	chr5	176647387	176659054
ENSG00000197837.3	HIST4H4	protein_coding	2.12663	0.530255	0.0334511	9	10	87	chr12	14767999	14771131
ENSG00000125449.6	ARMC7	protein_coding	2.12511	5.78766	0.0335778	5	5	104	chr17	75109952	75130265
ENSG00000182253.14	SYNM	protein_coding	2.12501	0.609454	0.0335854	28	28	206	chr15	99098217	99135593
ENSG00000157107.13	FCHO2	protein_coding	-2.12458	-5.45499	0.0336216	10	10	206	chr5	72955981	73090522
ENSG00000143862.7	ARL8A	protein_coding	2.12345	3.74457	0.0337162	10	10	93	chr1	202133404	202144743
ENSG00000183726.10	TMEM50A	protein_coding	2.12229	1.02003	0.0338134	19	19	193	chr1	25337917	25362361
ENSG00000237350.1	CDC42P6	processed_pseudogene	2.12144	1.38399	0.0338846	3	3	66	chr4	22727375	22727950
ENSG00000173193.13	PARP14	protein_coding	2.12127	1.02548	0.0338994	22	22	222	chr3	122680618	122730840
ENSG00000110651.11	CD81	protein_coding	2.12122	1.97027	0.0339029	4	5	110	chr11	2376177	2397419
ENSG00000113356.11	POLR3G	protein_coding	-2.12006	-0.261499	0.0340008	12	13	176	chr5	90471748	90514553
ENSG00000102543.14	CDADC1	protein_coding	2.11951	4.05324	0.0340473	5	5	69	chr13	49247925	49293485
ENSG00000073849.14	ST6GAL1	protein_coding	-2.1191	-4.49419	0.0340821	5	5	94	chr3	186930485	187078553
ENSG00000092148.12	HECTD1	protein_coding	-2.11833	-5.20433	0.0341468	6	7	89	chr14	31100112	31207804
ENSG00000123901.8	GPR83	protein_coding	2.11674	0.337872	0.0342821	19	19	472	chr11	94377311	94401419
ENSG00000198270.12	TMEM116	protein_coding	-2.11622	-0.581607	0.0343265	16	16	159	chr12	111931282	112013185
ENSG00000251136.8	RP11-37B2.1	lincRNA	2.11608	0.22495	0.0343376	12	12	302	chr8	89609409	89757727
ENSG00000213337.8	ANKRD39	protein_coding	-2.1154	-2.86443	0.0343957	2	2	54	chr2	96836611	96858095
ENSG00000164118.12	CEP44	protein_coding	2.1153	0.896317	0.034404	17	17	209	chr4	174283677	174333380
ENSG00000127533.3	F2RL3	protein_coding	2.11507	1.11963	0.034424	7	7	72	chr19	16888860	16892606
ENSG00000099250.17	NRP1	protein_coding	2.11461	1.62318	0.0344635	10	11	137	chr10	33177492	33336262
ENSG00000214999.3	AC129492.6	antisense	-2.11287	-1.42475	0.0346115	27	30	493	chr17	8079482	8081565
ENSG00000074603.18	DPP8	protein_coding	-2.11244	-1.79666	0.0346486	13	13	165	chr15	65442463	65517704
ENSG00000225850.3	RP11-452K12.4	antisense	2.11231	1.44537	0.0346601	13	13	305	chr10	97334564	97343203
ENSG00000064652.10	SNX24	protein_coding	-2.11158	-0.547657	0.0347221	18	18	202	chr5	122843439	123029354
ENSG00000139567.12	ACVRL1	protein_coding	2.11117	2.10747	0.0347573	11	12	115	chr12	51906908	51923361
ENSG00000214022.11	REPIN1	protein_coding	2.11073	2.09365	0.0347956	15	18	179	chr7	150368189	150374044
ENSG00000205808.5	PLPP6	protein_coding	-2.11069	-2.52025	0.0347987	17	18	204	chr9	4662315	4665258
ENSG00000163017.13	ACTG2	protein_coding	2.10894	2.71762	0.03495	4	4	45	chr2	73892314	73919865
ENSG00000078487.17	ZCWPW1	protein_coding	2.10862	0.767853	0.034977	17	17	216	chr7	100400853	100428792
ENSG00000183647.10	ZNF530	protein_coding	-2.1078	-1.61981	0.0350482	14	14	128	chr19	57599885	57612722
ENSG00000267283.1	AC005306.3	processed_transcript	-2.10675	-0.636031	0.0351391	14	14	117	chr19	1989401	1990203
ENSG00000163545.8	NUAK2	protein_coding	-2.10637	-0.939303	0.0351722	5	5	72	chr1	205302059	205321791
ENSG00000121210.15	KIAA0922	protein_coding	2.10592	2.21655	0.0352115	10	10	100	chr4	153466346	153636711
ENSG00000259954.1	IL21R-AS1	antisense	2.10551	0.798756	0.0352468	15	15	523	chr16	27447669	27453393
ENSG00000182983.14	ZNF662	protein_coding	2.10536	1.22524	0.0352596	35	37	523	chr3	42905731	42917641
ENSG00000169230.9	PRELID1	protein_coding	2.10503	0.719642	0.0352888	10	10	150	chr5	177303774	177306959
ENSG00000114904.12	NEK4	protein_coding	2.10469	2.66154	0.0353182	5	5	153	chr3	52708449	52770949
ENSG00000154764.5	WNT7A	protein_coding	-2.1034	-6.45892	0.0354308	10	11	358	chr3	13816258	13880121
ENSG00000198042.10	MAK16	protein_coding	-2.10315	-0.68451	0.0354526	5	5	150	chr8	33484750	33501260
ENSG00000204421.2	LY6G6C	protein_coding	2.10264	6.28593	0.0354971	2	2	167	chr6	31718648	31721845
ENSG00000107959.15	PITRM1	protein_coding	-2.10256	-0.27651	0.0355046	36	44	412	chr10	3137728	3172841
ENSG00000008311.14	AASS	protein_coding	2.10242	3.99143	0.0355165	2	2	118	chr7	122076133	122144280
ENSG00000163956.10	LRPAP1	protein_coding	-2.10241	-0.441133	0.0355177	13	15	289	chr4	3506376	3532559
ENSG00000188868.13	ZNF563	protein_coding	-2.10185	-2.16416	0.0355668	6	6	84	chr19	12317477	12333720
ENSG00000112212.11	TSPO2	protein_coding	2.10097	1.70972	0.0356433	30	30	427	chr6	41042554	41044337
ENSG00000160117.14	ANKLE1	protein_coding	2.10023	2.14104	0.035709	1	1	228	chr19	17281645	17287646
ENSG00000181555.20	SETD2	protein_coding	-2.09843	-23.1725	0.0358674	6	6	128	chr3	47016429	47163967
ENSG00000198722.14	UNC13B	protein_coding	2.09821	2.94723	0.0358866	8	8	106	chr9	35161992	35405338
ENSG00000103365.15	GGA2	protein_coding	2.09809	2.90106	0.0358976	7	7	84	chr16	23463542	23521995
ENSG00000178913.7	TAF7	protein_coding	2.09641	3.98795	0.0360457	7	7	99	chr5	141260225	141320821
ENSG00000154277.12	UCHL1	protein_coding	-2.09557	-1.45421	0.03612	14	16	126	chr4	41256413	41268455
ENSG00000135045.6	C9orf40	protein_coding	-2.094	-7.00394	0.0362599	2	2	96	chr9	74946581	74952886
ENSG00000051341.13	POLQ	protein_coding	2.09391	5.5344	0.0362678	12	12	403	chr3	121431427	121546641
ENSG00000122644.12	ARL4A	protein_coding	-2.09372	-2.07485	0.0362847	19	19	167	chr7	12686856	12690934
ENSG00000185267.9	CDNF	protein_coding	-2.09248	-1.22578	0.036396	12	13	118	chr10	14819250	14838575
ENSG00000096401.7	CDC5L	protein_coding	-2.09164	-5.20852	0.0364708	5	5	73	chr6	44387525	44450426
ENSG00000189007.15	ADAT2	protein_coding	-2.09099	-0.548591	0.0365291	11	11	283	chr6	143422832	143450673
ENSG00000189051.5	RNF222	protein_coding	-2.09088	-1.48494	0.0365388	13	13	303	chr17	8390704	8397826
ENSG00000145050.15	MANF	protein_coding	2.09017	3.83599	0.0366021	7	7	65	chr3	51385047	51389397
ENSG00000205041.1	CTC-425O23.2	sense_intronic	-2.08893	-1.43382	0.0367141	3	3	59	chr19	40273489	40275479
ENSG00000182534.13	MXRA7	protein_coding	2.08868	0.104783	0.0367366	6	6	451	chr17	76672551	76711016
ENSG00000141505.11	ASGR1	protein_coding	-2.0884	-2.82704	0.0367619	13	13	125	chr17	7173431	7179564
ENSG00000002549.12	LAP3	protein_coding	2.08831	0.152273	0.0367696	17	18	165	chr4	17577192	17607972
ENSG00000111254.7	AKAP3	protein_coding	2.08746	1.08657	0.0368465	3	3	322	chr12	4615508	4649047
ENSG00000224415.1	RP11-401L13.4	processed_pseudogene	2.08626	5.4507	0.036955	5	5	64	chr7	103141349	103141939
ENSG00000145029.13	NICN1	protein_coding	-2.08618	-1.76267	0.0369621	10	10	172	chr3	49422946	49429326
ENSG00000080618.13	CPB2	protein_coding	-2.08586	-14.6685	0.036991	1	1	374	chr13	46053186	46105076
ENSG00000139651.10	ZNF740	protein_coding	-2.08506	-1.16836	0.037064	1	1	166	chr12	53180700	53195141
ENSG00000135622.12	SEMA4F	protein_coding	2.08467	4.13429	0.0370992	6	7	92	chr2	74654228	74683853
ENSG00000103932.11	RPAP1	protein_coding	-2.08461	-0.249721	0.0371047	13	14	306	chr15	41517176	41544269
ENSG00000254521.6	SIGLEC12	protein_coding	2.08441	0.0607193	0.037123	7	9	560	chr19	51491357	51501789
ENSG00000156453.13	PCDH1	protein_coding	2.08355	3.06245	0.0372012	6	6	71	chr5	141853111	141879246
ENSG00000144182.16	LIPT1	protein_coding	-2.08326	-0.404836	0.0372276	18	20	278	chr2	99154955	99163157
ENSG00000109171.14	SLAIN2	protein_coding	2.08276	3.26002	0.0372727	12	12	128	chr4	48341322	48426212
ENSG00000240445.3	FOXO3B	processed_pseudogene	2.08208	0.885042	0.0373347	8	8	141	chr17	18670946	18672873
ENSG00000239697.10	TNFSF12	protein_coding	-2.08206	-0.372599	0.0373374	20	22	177	chr17	7548891	7557890
ENSG00000116251.9	RPL22	protein_coding	2.08137	22.4632	0.0374001	5	7	63	chr1	6181269	6209389
ENSG00000138346.14	DNA2	protein_coding	-2.08024	-0.541234	0.0375031	35	35	358	chr10	68414064	68472121
ENSG00000172817.3	CYP7B1	protein_coding	-2.08008	-0.713212	0.037518	1	1	125	chr8	64587763	64798761
ENSG00000078814.15	MYH7B	protein_coding	2.07951	0.440505	0.0375707	14	14	176	chr20	34975403	35002437
ENSG00000156508.17	EEF1A1	protein_coding	-2.07946	-10.6216	0.0375755	7	7	84	chr6	73515750	73523797
ENSG00000250274.1	CTB-114C7.4	lincRNA	-2.07939	-3.06635	0.0375818	8	8	181	chr5	170308701	170312716
ENSG00000104055.15	TGM5	protein_coding	-2.07894	-1.40511	0.0376232	10	10	272	chr15	43232595	43266857
ENSG00000101745.16	ANKRD12	protein_coding	2.07751	1.91313	0.0377543	5	5	139	chr18	9136228	9285985
ENSG00000221821.3	C6orf226	protein_coding	2.07736	0.951346	0.0377688	21	21	186	chr6	42890265	42890816
ENSG00000196498.13	NCOR2	protein_coding	2.07728	18.5235	0.0377753	4	5	77	chr12	124324415	124567464
ENSG00000189337.16	KAZN	protein_coding	2.07607	0.156564	0.0378872	2	2	104	chr1	13892792	15118043
ENSG00000008869.11	HEATR5B	protein_coding	-2.07569	-1.643	0.0379224	5	5	81	chr2	36968383	37084342
ENSG00000076864.19	RAP1GAP	protein_coding	2.07564	0.178513	0.0379269	16	16	119	chr1	21596215	21669363
ENSG00000072110.13	ACTN1	protein_coding	2.07545	6.03628	0.037945	1	1	114	chr14	68874143	68979440
ENSG00000209480.1	SNORD83B	snoRNA	-2.07523	-1.80967	0.0379653	14	14	400	chr22	39313819	39313911
ENSG00000105699.16	LSR	protein_coding	-2.07521	-0.757112	0.0379666	13	15	180	chr19	35248330	35267964
ENSG00000178691.10	SUZ12	protein_coding	-2.0752	-9.53048	0.0379676	7	7	97	chr17	31937018	32001045
ENSG00000166233.14	ARIH1	protein_coding	-2.07483	-21.8945	0.0380024	3	3	102	chr15	72474326	72602985
ENSG00000162994.15	CLHC1	protein_coding	2.0737	0.107702	0.0381072	39	39	472	chr2	55174791	55232563
ENSG00000213613.2	RPL11P3	processed_pseudogene	-2.07367	-1.07897	0.03811	30	30	381	chr10	87945502	87946024
ENSG00000169567.11	HINT1	protein_coding	-2.07361	-4.51777	0.0381159	11	11	157	chr5	131159027	131171735
ENSG00000136828.18	RALGPS1	protein_coding	2.07248	0.568447	0.0382207	9	9	81	chr9	126914774	127223166
ENSG00000211717.3	TRBV10-1	TR_V_gene	-2.07212	-0.21098	0.0382538	21	23	49	chr7	142399860	142400377
ENSG00000177058.11	SLC38A9	protein_coding	2.07127	21.1281	0.0383337	2	2	213	chr5	55625845	55773194
ENSG00000227262.3	HCG4B	unprocessed_pseudogene	-2.06998	-0.197711	0.0384543	45	47	559	chr6	29925983	29926973
ENSG00000186470.13	BTN3A2	protein_coding	2.0679	0.0705963	0.0386493	8	8	333	chr6	26365159	26378320
ENSG00000102978.12	POLR2C	protein_coding	-2.06764	-17.8682	0.038674	1	1	192	chr16	57462387	57472010
ENSG00000111300.9	NAA25	protein_coding	-2.06757	-2.52615	0.0386804	2	2	135	chr12	112026689	112109022
ENSG00000169918.9	OTUD7A	protein_coding	-2.06686	-0.905702	0.0387471	11	12	126	chr15	31475398	31870789
ENSG00000170881.4	RNF139	protein_coding	-2.06677	-1.97733	0.0387561	11	13	110	chr8	124474738	124487914
ENSG00000196730.12	DAPK1	protein_coding	2.06626	0.424366	0.0388043	11	11	139	chr9	87497228	87708633
ENSG00000225399.4	RP11-3B7.1	lincRNA	2.06578	0.588382	0.0388491	14	14	253	chr3	49260085	49261316
ENSG00000181856.14	SLC2A4	protein_coding	2.06561	131.928	0.038865	1	1	107	chr17	7281667	7288257
ENSG00000181885.18	CLDN7	protein_coding	-2.06561	-1.29427	0.038865	1	1	159	chr17	7259903	7263983
ENSG00000144029.11	MRPS5	protein_coding	-2.06546	-3.79322	0.0388798	2	2	51	chr2	95087207	95149434
ENSG00000165392.9	WRN	protein_coding	2.06538	6.83164	0.0388871	4	4	222	chr8	31033801	31173769
ENSG00000196605.7	ZNF846	protein_coding	-2.06497	-0.246457	0.0389263	23	24	255	chr19	9751993	9793180
ENSG00000112651.11	MRPL2	protein_coding	2.06462	4.99981	0.0389593	5	5	77	chr6	43054029	43059806
ENSG00000133794.17	ARNTL	protein_coding	-2.06461	-0.491846	0.0389597	6	6	82	chr11	13276652	13387266
ENSG00000117593.9	DARS2	protein_coding	-2.06438	-0.954777	0.0389822	19	19	239	chr1	173824503	173858546
ENSG00000169627.7	BOLA2B	protein_coding	2.06394	0.321648	0.0390239	7	8	27	chr16	30192934	30194306
ENSG00000103335.21	PIEZO1	protein_coding	2.06371	0.873746	0.0390448	20	21	290	chr16	88715343	88785211
ENSG00000162300.11	ZFPL1	protein_coding	-2.06351	-3.59019	0.0390645	5	5	73	chr11	65084223	65088400
ENSG00000131149.18	GSE1	protein_coding	2.06323	5.66364	0.0390904	10	11	53	chr16	85169525	85676204
ENSG00000100994.11	PYGB	protein_coding	2.06141	0.156439	0.0392635	10	10	263	chr20	25248069	25298014
ENSG00000136874.10	STX17	protein_coding	2.06123	0.278713	0.0392814	8	8	151	chr9	99906633	99970341
ENSG00000185090.14	MANEAL	protein_coding	2.0611	1.06773	0.0392938	18	19	125	chr1	37793802	37801137
ENSG00000174807.3	CD248	protein_coding	2.06108	12.3037	0.0392957	3	3	58	chr11	66314487	66317044
ENSG00000145041.15	DCAF1	protein_coding	-2.06057	-9.32688	0.0393445	7	7	74	chr3	51395867	51500002
ENSG00000249242.7	TMEM150C	protein_coding	-2.05976	-0.843702	0.0394217	15	15	197	chr4	82483170	82562357
ENSG00000120675.5	DNAJC15	protein_coding	2.05972	0.0756091	0.0394251	7	7	422	chr13	43023203	43114224
ENSG00000133935.6	C14orf1	protein_coding	2.05774	331.707	0.039615	1	1	56	chr14	75649791	75661189
ENSG00000223886.3	RP11-251G23.2	processed_pseudogene	-2.05769	-0.496932	0.0396198	3	3	452	chr7	105530209	105530671
ENSG00000132749.10	TESMIN	protein_coding	-2.05713	-0.360672	0.0396733	33	36	555	chr11	68707440	68751564
ENSG00000175315.2	CST6	protein_coding	2.05665	2.55447	0.0397202	2	2	103	chr11	66011841	66013505
ENSG00000129480.12	DTD2	protein_coding	-2.05596	-1.14665	0.039786	19	20	243	chr14	31446036	31457510
ENSG00000174373.16	RALGAPA1	protein_coding	2.05535	0.426878	0.039845	24	24	338	chr14	35538352	35809304
ENSG00000145040.3	UCN2	protein_coding	-2.05351	-1.25974	0.0400233	13	13	273	chr3	48561727	48563773
ENSG00000119912.15	IDE	protein_coding	-2.05331	-2.3243	0.0400423	7	7	101	chr10	92451684	92574076
ENSG00000148396.18	SEC16A	protein_coding	2.05327	1.07794	0.0400462	2	2	307	chr9	136440096	136483759
ENSG00000103168.16	TAF1C	protein_coding	-2.05257	-0.403232	0.0401143	5	5	501	chr16	84177847	84187070
ENSG00000144566.10	RAB5A	protein_coding	2.05223	4.05963	0.0401476	8	8	67	chr3	19947079	19985175
ENSG00000103653.16	CSK	protein_coding	2.05197	2.74708	0.0401722	4	4	113	chr15	74782057	74803198
ENSG00000135486.17	HNRNPA1	protein_coding	-2.05158	-2.30949	0.0402102	6	6	42	chr12	54280193	54287088
ENSG00000245105.2	A2M-AS1	antisense	2.05131	2.76024	0.0402369	5	5	514	chr12	9065177	9068060
ENSG00000136830.11	FAM129B	protein_coding	-2.05091	-1.98427	0.0402754	8	8	119	chr9	127505339	127578989
ENSG00000065809.13	FAM107B	protein_coding	-2.05051	-0.704221	0.0403146	3	3	220	chr10	14518557	14774897
ENSG00000146282.17	RARS2	protein_coding	2.04866	1.43372	0.0404957	12	12	143	chr6	87514378	87590003
ENSG00000202533.1	Y_RNA	misc_RNA	-2.04724	-0.572873	0.0406342	13	13	270	chr5	132468147	132468257
ENSG00000213465.7	ARL2	protein_coding	-2.04687	-7.04947	0.0406711	4	4	89	chr11	65014113	65022184
ENSG00000155330.9	C16orf87	protein_coding	2.04655	1.80932	0.0407022	5	5	59	chr16	46796607	46831411
ENSG00000120662.15	MTRF1	protein_coding	-2.04621	-2.1271	0.0407359	2	2	156	chr13	41216369	41263577
ENSG00000117399.13	CDC20	protein_coding	-2.04609	-9.17092	0.0407473	4	4	64	chr1	43358955	43363203
ENSG00000036054.12	TBC1D23	protein_coding	-2.04598	-1.62714	0.040758	6	6	122	chr3	100261000	100325251
ENSG00000225793.2	RP1-234P15.4	lincRNA	2.04383	1.74498	0.0409706	6	7	94	chr6	75285014	75297003
ENSG00000103005.11	USB1	protein_coding	2.0431	5.01522	0.0410425	5	5	67	chr16	57999546	58021618
ENSG00000182687.3	GALR2	protein_coding	-2.0409	-1.3386	0.0412608	17	17	556	chr17	76074794	76077541
ENSG00000160961.11	ZNF333	protein_coding	2.04064	0.291389	0.041287	11	12	266	chr19	14690049	14733746
ENSG00000014216.15	CAPN1	protein_coding	2.04049	0.920414	0.0413012	10	10	111	chr11	65180566	65212006
ENSG00000146540.14	C7orf50	protein_coding	-2.03991	-2.07188	0.0413589	9	11	224	chr7	996986	1138260
ENSG00000026652.13	AGPAT4	protein_coding	-2.03926	-48.5691	0.041424	1	1	141	chr6	161129979	161274061
ENSG00000116793.15	PHTF1	protein_coding	2.03911	3.17824	0.0414386	12	12	140	chr1	113696831	113759489
ENSG00000118495.18	PLAGL1	protein_coding	2.03911	2.27012	0.0414394	6	6	55	chr6	143940300	144064599
ENSG00000214706.10	IFRD2	protein_coding	2.03864	10.9111	0.041486	1	1	78	chr3	50287732	50292918
ENSG00000111846.16	GCNT2	protein_coding	-2.03864	-0.144505	0.0414863	15	15	657	chr6	10492223	10629368
ENSG00000198380.12	GFPT1	protein_coding	2.03845	0.686522	0.0415054	10	10	204	chr2	69319769	69387254
ENSG00000213339.8	QTRT1	protein_coding	-2.0383	-6.43746	0.0415198	5	6	58	chr19	10701451	10713437
ENSG00000205045.8	SLFN12L	protein_coding	-2.03823	-84.3841	0.041527	1	1	503	chr17	35473689	35537861
ENSG00000140009.18	ESR2	protein_coding	-2.03775	-0.734189	0.0415749	2	2	568	chr14	64084232	64338112
ENSG00000116857.16	TMEM9	protein_coding	2.03759	0.136505	0.0415909	18	18	246	chr1	201134772	201171574
ENSG00000102871.15	TRADD	protein_coding	-2.0375	-14.1162	0.0415997	3	3	86	chr16	67154180	67160298
ENSG00000246273.6	SBF2-AS1	antisense	-2.03681	-0.818503	0.041669	11	11	150	chr11	9758292	9811319
ENSG00000233483.2	CTD-2020K17.4	antisense	-2.03661	-0.70259	0.0416896	22	22	444	chr17	45245186	45248836
ENSG00000187860.10	CCDC157	protein_coding	2.03641	0.418595	0.0417089	17	17	127	chr22	30356635	30376829
ENSG00000224940.8	PRRT4	protein_coding	2.03601	2.17414	0.041749	35	35	453	chr7	128350325	128361685
ENSG00000173011.11	TADA2B	protein_coding	2.0353	4.80777	0.0418211	10	10	85	chr4	7041899	7057952
ENSG00000070718.11	AP3M2	protein_coding	-2.03456	-0.281723	0.041895	1	1	213	chr8	42152946	42171673
ENSG00000083099.10	LYRM2	protein_coding	-2.03456	-0.868999	0.0418951	18	20	249	chr6	89568144	89638753
ENSG00000134684.10	YARS	protein_coding	2.03421	3.68151	0.0419307	6	6	53	chr1	32775237	32818153
ENSG00000032389.12	TSSC1	protein_coding	-2.0334	-2.71817	0.0420122	10	11	106	chr2	3188925	3377882
ENSG00000101000.5	PROCR	protein_coding	2.03307	0.564871	0.0420453	8	8	168	chr20	35172073	35216240
ENSG00000120802.13	TMPO	protein_coding	-2.033	-12.608	0.042053	1	1	87	chr12	98515512	98550379
ENSG00000104805.15	NUCB1	protein_coding	2.03267	0.721097	0.042086	1	1	153	chr19	48900050	48923372
ENSG00000149328.14	GLB1L2	protein_coding	2.03238	1.79107	0.0421155	11	11	239	chr11	134331874	134378341
ENSG00000248406.1	CTD-3105H18.4	transcribed_unprocessed_pseudogene	-2.0322	-7.13746	0.0421338	4	4	133	chr19	12379746	12383687
ENSG00000161896.11	IP6K3	protein_coding	-2.0311	-0.994865	0.0422445	7	7	225	chr6	33721670	33746905
ENSG00000143420.18	ENSA	protein_coding	-2.03074	-1.00296	0.0422817	10	10	89	chr1	150600851	150629612
ENSG00000231327.1	LINC01816	lincRNA	-2.03032	-107.63	0.042324	1	1	79	chr2	70124036	70125317
ENSG00000116679.15	IVNS1ABP	protein_coding	2.02932	4.29163	0.0424256	2	2	75	chr1	185296388	185317329
ENSG00000249471.7	ZNF324B	protein_coding	-2.02916	-2.41931	0.0424416	4	4	59	chr19	58451604	58457833
ENSG00000126001.15	CEP250	protein_coding	-2.02813	-2.59998	0.0425467	5	5	127	chr20	35455164	35519280
ENSG00000221990.4	EXOC3-AS1	antisense	2.02743	0.667335	0.0426185	23	27	324	chr5	441498	443160
ENSG00000111537.4	IFNG	protein_coding	2.02727	3.48631	0.0426344	15	17	250	chr12	68154768	68159747
ENSG00000160801.13	PTH1R	protein_coding	-2.02646	-2.84361	0.0427173	9	9	139	chr3	46877746	46903799
ENSG00000225492.6	GBP1P1	transcribed_unprocessed_pseudogene	2.02626	188.355	0.042738	1	1	194	chr1	89407679	89426243
ENSG00000100100.12	PIK3IP1	protein_coding	-2.02572	-0.586824	0.0427934	9	9	94	chr22	31281593	31292534
ENSG00000138382.14	METTL5	protein_coding	2.02557	1.04927	0.0428091	12	12	155	chr2	169810081	169824931
ENSG00000227039.6	ITGB2-AS1	antisense	-2.02499	-0.249637	0.0428679	3	3	286	chr21	44921051	44929678
ENSG00000224080.1	UBE2FP1	processed_pseudogene	-2.02279	-11.3534	0.0430945	2	2	143	chr3	37143512	37143958
ENSG00000227766.1	HCG4P5	unprocessed_pseudogene	-2.02201	-0.223823	0.0431757	16	17	405	chr6	29942075	29943067
ENSG00000122335.13	SERAC1	protein_coding	2.02193	0.238322	0.0431839	20	20	315	chr6	158109515	158168270
ENSG00000122873.11	CISD1	protein_coding	-2.02177	-0.111057	0.0431999	4	4	195	chr10	58269058	58289586
ENSG00000164885.12	CDK5	protein_coding	-2.02131	-17.4503	0.0432476	9	9	101	chr7	151053812	151058530
ENSG00000141013.16	GAS8	protein_coding	-2.01974	-0.225507	0.04341	20	21	319	chr16	90019629	90044975
ENSG00000079337.15	RAPGEF3	protein_coding	-2.01973	-0.153278	0.0434119	34	34	297	chr12	47734367	47771040
ENSG00000166925.8	TSC22D4	protein_coding	-2.0195	-5.09866	0.0434353	9	9	151	chr7	100463359	100479279
ENSG00000127831.10	VIL1	protein_coding	-2.01932	-2.34767	0.0434541	10	10	223	chr2	218419092	218453295
ENSG00000128039.10	SRD5A3	protein_coding	2.01866	0.099824	0.0435227	13	13	516	chr4	55346109	55373096
ENSG00000215190.9	LINC00680	transcribed_unprocessed_pseudogene	-2.01853	-0.13688	0.0435358	7	7	410	chr6	57946074	57961501
ENSG00000245468.3	RP11-367J11.3	lincRNA	-2.01803	-0.897501	0.0435879	33	33	777	chr4	7094571	7103385
ENSG00000111275.12	ALDH2	protein_coding	-2.01799	-0.508909	0.0435923	6	6	137	chr12	111766887	111817529
ENSG00000198590.11	C3orf35	protein_coding	-2.01771	-3.05006	0.043621	1	1	81	chr3	37386269	37435497
ENSG00000214274.9	ANG	protein_coding	-2.0156	-1.89001	0.043842	1	1	196	chr14	20684177	20698971
ENSG00000132153.14	DHX30	protein_coding	-2.01539	-3.95098	0.0438636	6	6	54	chr3	47802928	47850195
ENSG00000183154.1	RP11-863K10.7	antisense	2.01515	2.72415	0.0438886	6	6	81	chr8	37734761	37737426
ENSG00000196301.3	HLA-DRB9	unprocessed_pseudogene	-2.01474	-0.122458	0.0439322	7	9	433	chr6	32459821	32473500
ENSG00000152518.7	ZFP36L2	protein_coding	-2.01431	-2.38322	0.0439767	9	10	114	chr2	43222402	43226609
ENSG00000184916.8	JAG2	protein_coding	2.01406	2.10492	0.0440034	2	3	96	chr14	105140981	105168824
ENSG00000171819.4	ANGPTL7	protein_coding	2.01246	1.06392	0.0441713	9	9	92	chr1	11189341	11195981
ENSG00000164136.16	IL15	protein_coding	-2.01229	-1.91649	0.044189	1	1	154	chr4	141636599	141733987
ENSG00000179428.2	AC073072.5	antisense	-2.01179	-0.333353	0.0442416	26	27	405	chr7	22725395	22727620
ENSG00000079691.17	CARMIL1	protein_coding	2.01159	0.172956	0.0442635	18	19	191	chr6	25279078	25620530
ENSG00000189129.13	PLAC9	protein_coding	-2.0112	-0.360954	0.0443046	38	39	331	chr10	80131682	80145359
ENSG00000123600.19	METTL8	protein_coding	-2.01106	-0.323677	0.0443189	3	4	154	chr2	171317405	171434802
ENSG00000109762.15	SNX25	protein_coding	-2.01049	-3.29753	0.044379	1	1	112	chr4	185204237	185370185
ENSG00000117713.18	ARID1A	protein_coding	2.01014	5.0934	0.0444162	5	5	84	chr1	26693236	26782104
ENSG00000198865.9	CCDC152	protein_coding	-2.00952	-1.24797	0.0444824	7	7	109	chr5	42756801	42802360
ENSG00000230979.3	AC079250.1	processed_pseudogene	-2.00894	-205.871	0.044543	1	1	80	chr2	47690716	47691246
ENSG00000109519.12	GRPEL1	protein_coding	-2.00859	-31.6581	0.0445811	2	2	153	chr4	7058906	7068197
ENSG00000134531.9	EMP1	protein_coding	2.00857	2.32836	0.0445824	6	8	117	chr12	13196716	13219939
ENSG00000100991.11	TRPC4AP	protein_coding	-2.00822	-0.374541	0.0446202	21	21	250	chr20	35002404	35092871
ENSG00000122218.14	COPA	protein_coding	2.00764	0.280605	0.0446817	12	12	206	chr1	160289273	160343400
ENSG00000115042.9	FAHD2A	protein_coding	-2.00751	-3.35553	0.044695	2	2	68	chr2	95402721	95416616
ENSG00000204001.9	LCN8	protein_coding	-2.00723	-0.866666	0.0447249	16	16	424	chr9	136754386	136758543
ENSG00000129696.12	TTI2	protein_coding	2.00566	0.495549	0.0448923	6	6	99	chr8	33473386	33513601
ENSG00000136147.17	PHF11	protein_coding	-2.00436	-1.03895	0.045031	1	1	148	chr13	49495665	49528987
ENSG00000099949.18	LZTR1	protein_coding	-2.00325	-0.145992	0.0451501	4	4	253	chr22	20979462	20999038
ENSG00000082212.12	ME2	protein_coding	2.00172	2.73671	0.0453149	10	10	134	chr18	50878734	50954257
ENSG00000130513.6	GDF15	protein_coding	2.00138	0.423514	0.0453516	11	11	83	chr19	18374731	18389176
ENSG00000178127.12	NDUFV2	protein_coding	2.00095	31.5433	0.045398	1	2	77	chr18	9102630	9134345
ENSG00000068878.14	PSME4	protein_coding	2.00056	1.74761	0.0454396	9	9	125	chr2	53864067	53970840
ENSG00000135211.5	TMEM60	protein_coding	-1.99964	-0.398356	0.0455387	2	2	153	chr7	77793728	77798580
ENSG00000255112.2	CHMP1B	protein_coding	-1.99963	-7.70397	0.0455407	7	8	84	chr18	11851396	11854449
ENSG00000152818.18	UTRN	protein_coding	1.99955	4.69668	0.0455489	10	10	112	chr6	144285701	144853034
ENSG00000153832.11	FBXO36	protein_coding	1.99949	0.327093	0.0455549	16	16	273	chr2	229922302	230013109
ENSG00000203761.5	MSTO2P	unprocessed_pseudogene	1.99943	0.687746	0.0455613	13	13	146	chr1	155745829	155750137
ENSG00000148334.14	PTGES2	protein_coding	1.99922	2.89393	0.0455844	6	6	53	chr9	128120693	128128462
ENSG00000152465.17	NMT2	protein_coding	-1.99913	-0.291439	0.0455938	20	20	289	chr10	15102584	15168693
ENSG00000124702.17	KLHDC3	protein_coding	1.9987	4.24052	0.0456408	8	9	111	chr6	43014103	43021298
ENSG00000178971.13	CTC1	protein_coding	1.99837	0.232726	0.0456766	42	43	251	chr17	8224821	8248044
ENSG00000105778.18	AVL9	protein_coding	-1.99794	-5.8634	0.0457231	10	10	124	chr7	32495426	32588721
ENSG00000137331.11	IER3	protein_coding	-1.99767	-8.04136	0.0457523	4	4	246	chr6	30743199	30744554
ENSG00000206066.3	IGLL3P	unprocessed_pseudogene	1.99694	0.757796	0.0458322	9	9	229	chr22	25318256	25320080
ENSG00000126456.15	IRF3	protein_coding	1.99642	2.40142	0.0458887	11	11	186	chr19	49659569	49665875
ENSG00000186831.11	KRT17P2	transcribed_unprocessed_pseudogene	1.99576	0.245102	0.0459602	8	8	181	chr17	18426861	18431848
ENSG00000240399.1	RP1-228P16.1	transcribed_processed_pseudogene	1.99549	0.159164	0.04599	14	14	333	chr12	48054813	48055591
ENSG00000126822.16	PLEKHG3	protein_coding	1.99515	99.9893	0.0460263	2	2	148	chr14	64704102	64750247
ENSG00000132357.13	CARD6	protein_coding	-1.99423	-3.25059	0.0461267	15	15	224	chr5	40841184	40860175
ENSG00000234608.7	MAPKAPK5-AS1	lincRNA	-1.99409	-1.40141	0.046142	1	1	68	chr12	111839764	111842902
ENSG00000151689.12	INPP1	protein_coding	-1.99368	-1.09907	0.0461872	9	9	247	chr2	190343470	190371665
ENSG00000138621.11	PPCDC	protein_coding	1.99347	0.828796	0.0462105	17	18	203	chr15	75023555	75117462
ENSG00000115944.14	COX7A2L	protein_coding	1.99043	13.0534	0.046544	1	1	244	chr2	42333546	42425088
ENSG00000213533.11	TMEM110	protein_coding	1.99002	1.6167	0.0465887	3	3	168	chr3	52836219	52897596
ENSG00000135916.15	ITM2C	protein_coding	-1.98996	-5.34552	0.0465954	10	10	120	chr2	230864639	230879248
ENSG00000138032.20	PPM1B	protein_coding	1.98958	2.41225	0.0466372	8	9	118	chr2	44167969	44244384
ENSG00000167034.9	NKX3-1	protein_coding	1.98906	1.12364	0.0466946	8	8	149	chr8	23678693	23682927
ENSG00000145491.11	ROPN1L	protein_coding	1.98848	161.327	0.0467591	2	2	93	chr5	10441524	10472029
ENSG00000170485.16	NPAS2	protein_coding	-1.98706	-2.22142	0.0469161	8	8	77	chr2	100820152	100996829
ENSG00000176700.19	SCAND2P	transcribed_unprocessed_pseudogene	1.98704	0.217244	0.0469185	24	24	285	chr15	84631451	84647478
ENSG00000158023.9	WDR66	protein_coding	1.98702	0.362964	0.04692	18	19	168	chr12	121917862	122003927
ENSG00000196678.13	ERI2	protein_coding	1.98689	1.33895	0.0469349	7	7	152	chr16	20780193	20900349
ENSG00000141736.13	ERBB2	protein_coding	-1.98666	-2.61057	0.0469602	8	9	112	chr17	39687914	39730426
ENSG00000145423.4	SFRP2	protein_coding	-1.9863	-5.47083	0.047	1	1	109	chr4	153780592	153789120
ENSG00000085662.13	AKR1B1	protein_coding	-1.98622	-1.63345	0.0470094	11	11	130	chr7	134442350	134459252
ENSG00000131051.22	RBM39	protein_coding	1.98513	3.7577	0.0471297	4	4	34	chr20	35703610	35742312
ENSG00000196172.9	ZNF681	protein_coding	-1.98506	-0.604745	0.0471375	27	28	463	chr19	23739195	23758891
ENSG00000183773.15	AIFM3	protein_coding	-1.98401	-1.41962	0.047255	1	1	108	chr22	20965108	20981360
ENSG00000226314.7	ZNF192P1	transcribed_unprocessed_pseudogene	-1.98332	-0.222031	0.0473321	21	21	296	chr6	28161781	28169594
ENSG00000159685.10	CHCHD6	protein_coding	-1.98181	-3.72029	0.0475	1	1	161	chr3	126704220	126960406
ENSG00000170606.14	HSPA4	protein_coding	1.98151	1.27255	0.0475343	16	16	151	chr5	133051962	133106449
ENSG00000159579.13	RSPRY1	protein_coding	1.98104	2.70737	0.047587	12	12	100	chr16	57186137	57240475
ENSG00000204428.12	LY6G5C	protein_coding	1.98095	0.0692605	0.0475968	23	25	422	chr6	31676684	31684040
ENSG00000260078.3	RP11-44F14.1	transcribed_unprocessed_pseudogene	1.98058	7.65913	0.047638	2	2	144	chr16	53364982	53373083
ENSG00000010327.10	STAB1	protein_coding	-1.98045	-3.25614	0.047653	4	4	86	chr3	52495338	52524495
ENSG00000058600.15	POLR3E	protein_coding	-1.97995	-2.70179	0.0477092	6	6	72	chr16	22297375	22335103
ENSG00000248568.1	KRT8P48	processed_pseudogene	-1.97934	-6.96282	0.0477775	6	7	221	chr5	146706381	146707600
ENSG00000132613.14	MTSS1L	protein_coding	-1.97728	-0.956243	0.0480101	13	13	128	chr16	70661204	70686066
ENSG00000196150.13	ZNF250	protein_coding	1.97694	2.96508	0.048049	7	7	76	chr8	144876497	144902168
ENSG00000137106.17	GRHPR	protein_coding	-1.97561	-0.136154	0.0481987	41	41	331	chr9	37422666	37436990
ENSG00000186635.14	ARAP1	protein_coding	-1.97483	-5.33969	0.0482872	4	4	117	chr11	72685069	72793599
ENSG00000183250.11	LINC01547	lincRNA	-1.97473	-2.54456	0.048299	1	1	216	chr21	44932814	44939913
ENSG00000121716.20	PILRB	protein_coding	-1.97401	-0.17768	0.0483807	15	15	477	chr7	100352176	100367733
ENSG00000100197.20	CYP2D6	protein_coding	1.97308	0.116043	0.0484868	6	6	327	chr22	42126499	42130906
ENSG00000151640.12	DPYSL4	protein_coding	-1.97284	-0.0850676	0.048514	4	4	397	chr10	132186900	132205776
ENSG00000100253.12	MIOX	protein_coding	1.97275	11.258	0.0485237	2	2	167	chr22	50486784	50490648
ENSG00000089685.14	BIRC5	protein_coding	-1.97251	-3.47396	0.0485516	10	10	46	chr17	78214186	78225636
ENSG00000167258.13	CDK12	protein_coding	-1.9706	-2.39219	0.04877	6	6	60	chr17	39461511	39564907
ENSG00000181741.7	FDX1P1	processed_pseudogene	1.97054	0.401868	0.0487764	7	7	180	chr20	34475924	34476474
ENSG00000112139.14	MDGA1	protein_coding	-1.9682	-0.564099	0.0490449	2	2	324	chr6	37630679	37699306
ENSG00000112159.11	MDN1	protein_coding	1.96812	5.92274	0.049054	1	1	96	chr6	89642499	89819723
ENSG00000176641.10	RNF152	protein_coding	1.96782	0.746663	0.0490891	32	33	481	chr18	61808063	61894247
ENSG00000145734.18	BDP1	protein_coding	-1.96771	-1.85514	0.049101	1	1	127	chr5	71455615	71567820
ENSG00000171596.6	NMUR1	protein_coding	-1.96666	-1.06315	0.0492227	25	25	500	chr2	231523160	231530495
ENSG00000240669.1	RP11-555K12.2	processed_pseudogene	-1.9665	-0.207285	0.0492415	6	7	13	chr4	152613875	152614333
ENSG00000134028.14	ADAMDEC1	protein_coding	-1.96607	-0.246684	0.0492904	23	23	411	chr8	24384285	24406013
ENSG00000196542.8	SPTSSB	protein_coding	-1.96553	-0.462265	0.0493529	26	27	500	chr3	161344792	161372880
ENSG00000184068.2	RP5-821D11.7	antisense	-1.96521	-0.306726	0.0493899	15	15	168	chr22	41831215	41834665
ENSG00000253250.2	C8orf88	protein_coding	-1.96509	-1.76857	0.0494042	7	7	178	chr8	90958637	90985257
ENSG00000138172.10	CALHM2	protein_coding	-1.96484	-3.38778	0.0494331	6	6	154	chr10	103446786	103452402
ENSG00000184357.4	HIST1H1B	protein_coding	1.96441	0.94105	0.0494827	9	10	111	chr6	27866849	27867529
ENSG00000205716.4	FAM183DP	processed_pseudogene	1.96404	7.67233	0.0495257	3	3	80	chr2	102249857	102250255
ENSG00000158163.14	DZIP1L	protein_coding	1.96296	9.74213	0.0496508	7	7	176	chr3	138061990	138115818
ENSG00000158793.13	NIT1	protein_coding	1.96263	1.56277	0.0496891	25	25	176	chr1	161118086	161125445
ENSG00000140497.16	SCAMP2	protein_coding	-1.96251	-0.321185	0.0497035	14	14	165	chr15	74843730	74873365
ENSG00000101391.20	CDK5RAP1	protein_coding	1.96157	1.92392	0.0498125	4	4	47	chr20	33358839	33401561
ENSG00000130303.12	BST2	protein_coding	-1.96118	-2.38104	0.0498575	14	14	108	chr19	17402939	17405648
ENSG00000184635.14	ZNF93	protein_coding	1.96106	2.75479	0.049872	1	1	299	chr19	19900913	19935575
ENSG00000121390.18	PSPC1	protein_coding	1.96001	3.06535	0.0499946	7	7	160	chr13	19674756	19783019
ENSG00000214900.9	LINC01588	lincRNA	-1.95949	-2.22983	0.0500549	2	2	473	chr14	49927571	50092643
ENSG00000221949.5	LINC01465	lincRNA	-1.95921	-2.28531	0.0500886	3	3	99	chr12	62601751	62603690
ENSG00000184047.16	DIABLO	protein_coding	1.95903	97.9453	0.050109	1	1	86	chr12	122207662	122227534
ENSG00000166503.8	RP11-382A20.3	protein_coding	-1.9583	-2.2961	0.0501947	7	7	78	chr15	83112738	83208018
ENSG00000119559.15	C19orf25	protein_coding	-1.95823	-3.50652	0.0502034	12	13	102	chr19	1461143	1479556
ENSG00000004838.13	ZMYND10	protein_coding	1.95602	1.65382	0.0504624	5	6	57	chr3	50341110	50346852
ENSG00000105325.13	FZR1	protein_coding	-1.95602	-1.48874	0.0504624	10	10	159	chr19	3506273	3538330
ENSG00000179912.20	R3HDM2	protein_coding	-1.9558	-4.38695	0.050489	6	6	97	chr12	57253764	57431005
ENSG00000110514.19	MADD	protein_coding	-1.95535	-0.88933	0.0505423	24	24	274	chr11	47269161	47330031
ENSG00000177483.11	RBM44	protein_coding	1.95531	0.257191	0.0505461	3	3	379	chr2	237798745	237842807
ENSG00000125630.15	POLR1B	protein_coding	-1.95514	-0.501173	0.0505669	26	28	309	chr2	112541915	112577150
ENSG00000139718.10	SETD1B	protein_coding	-1.95508	-8.38362	0.0505734	2	2	58	chr12	121804180	121832584
ENSG00000211974.3	IGHV2-70D	IG_V_gene	-1.95505	-4.34838	0.0505775	4	7	151	chr14	106723574	106724093
ENSG00000151150.21	ANK3	protein_coding	-1.95384	-0.916663	0.0507205	14	15	683	chr10	60026298	60733490
ENSG00000155070.8	UNC93B2	processed_pseudogene	-1.95372	-3.65949	0.0507342	5	5	158	chr7	6855485	6859830
ENSG00000166263.13	STXBP4	protein_coding	-1.95371	-0.157602	0.0507349	20	21	284	chr17	54968765	55173632
ENSG00000227057.9	WDR46	protein_coding	-1.95362	-2.36268	0.0507465	17	18	191	chr6	33279108	33289527
ENSG00000175854.11	SWI5	protein_coding	1.95314	2.72067	0.0508034	6	6	72	chr9	128275379	128288990
ENSG00000227295.2	ELL2P1	processed_pseudogene	-1.95109	-0.825619	0.051046	19	19	433	chr1	158175850	158177755
ENSG00000205869.2	KRTAP5-1	protein_coding	-1.95069	-1.28394	0.051094	34	40	636	chr11	1584342	1585283
ENSG00000172889.15	EGFL7	protein_coding	1.94996	8.04243	0.051181	6	8	127	chr9	136658856	136672678
ENSG00000183828.14	NUDT14	protein_coding	1.94974	0.225379	0.0512066	5	6	332	chr14	105172938	105181312
ENSG00000147684.7	NDUFB9	protein_coding	-1.94949	-1.01134	0.0512375	11	11	111	chr8	124539103	124568510
ENSG00000104722.13	NEFM	protein_coding	1.9483	1.6543	0.0513786	9	9	108	chr8	24913012	24919098
ENSG00000138757.14	G3BP2	protein_coding	1.94806	0.934029	0.051408	7	7	199	chr4	75642782	75724525
ENSG00000162073.13	PAQR4	protein_coding	-1.9473	-1.73402	0.051499	10	10	65	chr16	2969245	2973489
ENSG00000197712.11	FAM114A1	protein_coding	1.94711	0.292047	0.0515213	22	22	201	chr4	38867677	38945739
ENSG00000224738.1	AC099850.1	antisense	-1.94671	-0.351975	0.0515696	2	2	107	chr17	59106598	59118267
ENSG00000175040.5	CHST2	protein_coding	1.94644	1.68474	0.0516021	14	14	101	chr3	143119331	143124014
ENSG00000125637.15	PSD4	protein_coding	-1.94577	-0.100892	0.051682	1	1	315	chr2	113157325	113209396
ENSG00000177602.5	GSG2	protein_coding	1.94528	2.34316	0.0517408	13	14	784	chr17	3723903	3726699
ENSG00000023572.8	GLRX2	protein_coding	1.94476	0.450591	0.0518038	11	11	127	chr1	193096468	193106114
ENSG00000158985.13	CDC42SE2	protein_coding	1.94475	1.07688	0.0518046	11	11	159	chr5	131245493	131398447
ENSG00000108479.11	GALK1	protein_coding	1.94378	1.37286	0.0519222	7	7	134	chr17	75751594	75765711
ENSG00000160613.12	PCSK7	protein_coding	1.94351	1.65254	0.051955	1	1	97	chr11	117204337	117232525
ENSG00000096088.16	PGC	protein_coding	-1.94299	-5.28174	0.052017	1	1	97	chr6	41736711	41754109
ENSG00000164880.15	INTS1	protein_coding	-1.94178	-29.1296	0.0521638	2	2	486	chr7	1470277	1504367
ENSG00000111364.15	DDX55	protein_coding	-1.94129	-0.288902	0.0522231	38	41	364	chr12	123602099	123620941
ENSG00000143437.20	ARNT	protein_coding	1.94123	0.257543	0.0522305	13	13	209	chr1	150809705	150876768
ENSG00000145431.10	PDGFC	protein_coding	1.94041	2.14711	0.0523298	12	12	532	chr4	156760454	156971394
ENSG00000120889.12	TNFRSF10B	protein_coding	-1.94024	-1.43758	0.0523508	2	2	183	chr8	23020133	23069179
ENSG00000182057.4	OGFRP1	lincRNA	-1.93952	-0.151892	0.0524375	24	24	428	chr22	42269753	42275196
ENSG00000155428.12	TRIM74	protein_coding	-1.93879	-0.768654	0.0525272	10	10	103	chr7	72959485	72969466
ENSG00000178761.14	FAM219B	protein_coding	-1.93851	-1.47166	0.0525609	10	10	105	chr15	74899987	74907121
ENSG00000164050.12	PLXNB1	protein_coding	-1.93811	-1.60043	0.0526093	7	7	94	chr3	48403854	48430051
ENSG00000184863.10	RBM33	protein_coding	1.93769	5126.23	0.052661	1	1	121	chr7	155644451	155781485
ENSG00000144407.9	PTH2R	protein_coding	1.93731	3.70369	0.0527074	8	8	487	chr2	208359714	208854503
ENSG00000177565.16	TBL1XR1	protein_coding	-1.9362	-12.8294	0.0528429	3	3	110	chr3	177019340	177228000
ENSG00000168781.21	PPIP5K1	protein_coding	-1.93542	-6.4096	0.052939	1	1	48	chr15	43533462	43590253
ENSG00000101557.14	USP14	protein_coding	-1.93499	-3.93869	0.052992	1	1	159	chr18	158383	214629
ENSG00000082068.8	WDR70	protein_coding	-1.9349	-0.864035	0.0530031	5	5	78	chr5	37379212	37753435
ENSG00000204623.9	ZNRD1ASP	transcribed_unitary_pseudogene	1.93481	1.22166	0.0530135	15	18	552	chr6	30001011	30061640
ENSG00000143452.15	HORMAD1	protein_coding	1.93469	1.26066	0.0530279	2	2	241	chr1	150698060	150720888
ENSG00000149823.8	VPS51	protein_coding	1.93459	4.00553	0.0530405	6	6	99	chr11	65089324	65111860
ENSG00000267412.1	CTC-265F19.2	sense_intronic	-1.93451	-0.938511	0.0530509	33	39	680	chr19	2610155	2611862
ENSG00000230732.4	AC127904.2	sense_intronic	-1.9339	-0.105046	0.0531249	12	12	221	chr3	196912646	196914579
ENSG00000164818.15	DNAAF5	protein_coding	1.9338	0.174968	0.0531378	2	2	229	chr7	726701	786475
ENSG00000134853.11	PDGFRA	protein_coding	1.93371	1.72175	0.0531489	13	13	113	chr4	54229097	54298247
ENSG00000152475.6	ZNF837	protein_coding	1.93362	0.501585	0.0531601	11	12	121	chr19	58367618	58381060
ENSG00000178397.12	FAM220A	protein_coding	1.93227	0.693986	0.0533264	2	2	135	chr7	6329409	6348981
ENSG00000115165.9	CYTIP	protein_coding	1.93191	2.94127	0.0533704	23	23	501	chr2	157414619	157488961
ENSG00000248208.1	WDR45P1	processed_pseudogene	1.9319	1.40743	0.0533723	15	15	303	chr4	153658572	153659653
ENSG00000141101.12	NOB1	protein_coding	-1.93151	-2.50053	0.05342	9	9	165	chr16	69741867	69754940
ENSG00000204387.12	C6orf48	protein_coding	1.93137	1.36475	0.0534367	16	16	215	chr6	31834608	31839766
ENSG00000161960.14	EIF4A1	protein_coding	-1.93131	-4.07275	0.0534451	10	11	106	chr17	7572706	7579005
ENSG00000103154.9	NECAB2	protein_coding	-1.93113	-0.437697	0.0534669	76	77	879	chr16	83968632	84002776
ENSG00000171840.11	NINJ2	protein_coding	-1.93049	-0.808455	0.0535458	4	5	164	chr12	564296	663779
ENSG00000182551.13	ADI1	protein_coding	-1.93027	-7.14614	0.053574	1	1	200	chr2	3497361	3519736
ENSG00000090861.15	AARS	protein_coding	1.93004	5.78875	0.0536013	11	11	147	chr16	70252295	70289543
ENSG00000198937.8	CCDC167	protein_coding	-1.92999	-0.281923	0.0536082	21	21	225	chr6	37482920	37499922
ENSG00000175220.11	ARHGAP1	protein_coding	1.92978	0.978628	0.0536344	11	11	192	chr11	46677080	46700599
ENSG00000131781.12	FMO5	protein_coding	1.92927	0.636342	0.0536969	10	11	185	chr1	147175351	147243050
ENSG00000160194.17	NDUFV3	protein_coding	1.92924	0.235531	0.0537013	22	23	314	chr21	42879644	42913304
ENSG00000117697.14	NSL1	protein_coding	-1.92901	-2.8008	0.0537295	14	14	220	chr1	212726153	212791782
ENSG00000173727.12	CMB9-22P13.1	transcribed_unprocessed_pseudogene	-1.92864	-4.69679	0.053776	1	1	151	chr11	65455258	65466720
ENSG00000180834.7	MAP6D1	protein_coding	1.92835	0.251082	0.0538111	22	22	191	chr3	183815876	183825594
ENSG00000035403.17	VCL	protein_coding	-1.92828	-1.05835	0.0538204	7	8	185	chr10	73995193	74121363
ENSG00000223534.1	HLA-DQB1-AS1	antisense	1.92794	0.13239	0.053862	21	21	767	chr6	32659880	32660729
ENSG00000164086.9	DUSP7	protein_coding	-1.9274	-8.4559	0.0539304	4	4	43	chr3	52048919	52056550
ENSG00000112972.14	HMGCS1	protein_coding	-1.92705	-1.27033	0.0539729	4	4	69	chr5	43289395	43313512
ENSG00000143126.7	CELSR2	protein_coding	-1.92667	-1.17228	0.0540205	8	9	166	chr1	109250019	109275750
ENSG00000232216.1	IGHV3-43	IG_V_gene	-1.92655	-0.214303	0.0540354	5	9	274	chr14	106470264	106470800
ENSG00000157111.12	TMEM171	protein_coding	1.92652	0.600796	0.0540399	32	33	418	chr5	73120292	73131817
ENSG00000014123.9	UFL1	protein_coding	1.92616	0.968197	0.0540844	13	13	137	chr6	96521595	96555276
ENSG00000154330.12	PGM5	protein_coding	-1.92609	-0.238858	0.0540937	9	9	158	chr9	68328308	68531061
ENSG00000135956.8	TMEM127	protein_coding	-1.92607	-1.52958	0.0540951	10	10	137	chr2	96248516	96265994
ENSG00000198746.12	GPATCH3	protein_coding	1.92498	39.7777	0.0542318	2	2	36	chr1	26890488	26900466
ENSG00000167110.17	GOLGA2	protein_coding	1.92497	2.64041	0.0542329	5	5	80	chr9	128255829	128275995
ENSG00000105146.12	AURKC	protein_coding	-1.92457	-2.92423	0.0542836	3	3	229	chr19	57230802	57235548
ENSG00000167065.13	DUSP18	protein_coding	-1.92453	-0.369458	0.0542883	21	21	219	chr22	30652051	30667890
ENSG00000069702.10	TGFBR3	protein_coding	1.92425	5.56909	0.0543231	10	11	131	chr1	91680343	91906335
ENSG00000111696.11	NT5DC3	protein_coding	1.92412	0.104488	0.0543393	21	23	291	chr12	103770453	103841197
ENSG00000149591.16	TAGLN	protein_coding	-1.92388	-0.125218	0.0543695	9	9	109	chr11	117199321	117204782
ENSG00000147548.16	NSD3	protein_coding	1.92288	4.06161	0.0544947	7	7	83	chr8	38269697	38382272
ENSG00000161526.14	SAP30BP	protein_coding	1.9217	2.92878	0.0546436	9	10	87	chr17	75667116	75708062
ENSG00000168259.14	DNAJC7	protein_coding	-1.92135	-8.92649	0.0546873	6	6	69	chr17	41976433	42021376
ENSG00000169957.9	ZNF768	protein_coding	1.92084	1.77964	0.0547517	2	2	49	chr16	30524001	30526821
ENSG00000155755.18	TMEM237	protein_coding	-1.92055	-0.815047	0.0547889	8	8	100	chr2	201620184	201643570
ENSG00000145349.16	CAMK2D	protein_coding	-1.92052	-1.52032	0.0547925	12	12	116	chr4	113451032	113761927
ENSG00000152795.17	HNRNPDL	protein_coding	1.92047	4.1879	0.0547991	6	6	79	chr4	82422564	82430408
ENSG00000176658.16	MYO1D	protein_coding	1.92033	1.08836	0.0548168	12	12	143	chr17	32492522	32877177
ENSG00000226677.3	IGBP1P1	processed_pseudogene	-1.9202	-0.288208	0.0548326	8	8	504	chr14	34939324	34940332
ENSG00000247735.2	CTD-2574D22.2	antisense	-1.92012	-1.29025	0.0548431	4	4	76	chr16	29926836	29928933
ENSG00000112561.17	TFEB	protein_coding	-1.91993	-4.92468	0.0548671	8	9	138	chr6	41683978	41736259
ENSG00000138071.13	ACTR2	protein_coding	-1.91958	-8.28861	0.0549108	14	15	198	chr2	65227753	65271253
ENSG00000054598.6	FOXC1	protein_coding	-1.91914	-0.284172	0.0549664	11	15	108	chr6	1609972	1613897
ENSG00000054118.13	THRAP3	protein_coding	-1.91892	-1.59138	0.0549951	14	14	120	chr1	36224416	36305357
ENSG00000157778.8	PSMG3	protein_coding	1.91816	10.3341	0.055091	1	1	123	chr7	1567330	1571005
ENSG00000165572.7	KBTBD6	protein_coding	-1.91786	-2.81514	0.0551294	5	6	61	chr13	41127569	41132746
ENSG00000128872.9	TMOD2	protein_coding	-1.91764	-0.180083	0.0551572	3	3	146	chr15	51751561	51816368
ENSG00000163735.6	CXCL5	protein_coding	1.91736	1.26137	0.055192	17	17	458	chr4	73995642	73998779
ENSG00000145592.13	RPL37	protein_coding	1.9173	8.11748	0.0551997	9	9	87	chr5	40825262	40835335
ENSG00000186001.12	LRCH3	protein_coding	-1.91646	-2.92442	0.0553062	7	7	76	chr3	197791226	197888436
ENSG00000163734.4	CXCL3	protein_coding	1.91602	10.1698	0.055362	3	3	72	chr4	74036589	74038807
ENSG00000196876.15	SCN8A	protein_coding	-1.91553	-1.57909	0.0554251	12	12	565	chr12	51590266	51812864
ENSG00000179361.17	ARID3B	protein_coding	1.9154	4.0402	0.0554417	8	8	138	chr15	74541177	74598131
ENSG00000172046.18	USP19	protein_coding	1.91441	12.883	0.0555683	2	2	49	chr3	49108046	49120938
ENSG00000144559.10	TAMM41	protein_coding	1.91438	0.212561	0.0555721	23	24	391	chr3	11790442	11846919
ENSG00000133103.16	COG6	protein_coding	-1.91417	-1.26828	0.0555986	19	20	199	chr13	39655627	39791665
ENSG00000257949.6	TEN1	protein_coding	1.91376	0.12482	0.0556514	14	14	404	chr17	75979220	76000586
ENSG00000225200.2	AB019441.29	processed_pseudogene	-1.91296	-2.52355	0.0557528	5	6	66	chr14	105978520	105979146
ENSG00000103024.7	NME3	protein_coding	1.91292	3.47116	0.0557581	8	8	120	chr16	1770286	1771730
ENSG00000173085.13	COQ2	protein_coding	-1.91277	-18.4919	0.0557781	2	2	94	chr4	83261536	83284914
ENSG00000162267.12	ITIH3	protein_coding	1.91234	0.473252	0.0558332	4	4	68	chr3	52794768	52809009
ENSG00000197467.13	COL13A1	protein_coding	-1.91138	-10.6554	0.0559552	3	3	644	chr10	69801931	69964275
ENSG00000167994.11	RAB3IL1	protein_coding	-1.91124	-1.37999	0.0559737	4	4	80	chr11	61897301	61920269
ENSG00000021852.12	C8B	protein_coding	1.91079	1.83319	0.0560309	3	3	75	chr1	56929210	56966140
ENSG00000102981.9	PARD6A	protein_coding	-1.91006	-2.18892	0.0561258	3	3	68	chr16	67660946	67662778
ENSG00000149792.8	MRPL49	protein_coding	-1.9099	-3.20889	0.0561462	6	6	57	chr11	65122183	65127371
ENSG00000105246.5	EBI3	protein_coding	1.90892	14.513	0.056273	1	1	110	chr19	4229498	4237531
ENSG00000255974.7	CYP2A6	protein_coding	1.9088	2.89726	0.056288	1	3	574	chr19	40843538	40850447
ENSG00000213073.4	RP11-288H12.3	transcribed_processed_pseudogene	-1.90853	-0.614468	0.0563231	4	4	92	chr6	160093082	160096212
ENSG00000249119.1	MTND6P4	processed_pseudogene	1.90729	3.73415	0.0564825	2	2	42	chr5	134924123	134924644
ENSG00000185290.3	NUPR2	protein_coding	1.90707	0.103539	0.0565119	19	19	491	chr7	56114681	56116400
ENSG00000115902.10	SLC1A4	protein_coding	-1.9067	-1.29	0.0565588	12	12	200	chr2	64988477	65023865
ENSG00000011638.10	TMEM159	protein_coding	1.90576	4.19659	0.0566807	5	7	136	chr16	21158377	21180616
ENSG00000156966.6	B3GNT7	protein_coding	1.90452	1.0906	0.0568426	11	11	99	chr2	231395543	231401164
ENSG00000211690.1	TRGJ1	TR_J_gene	1.9044	0.258217	0.0568585	14	16	36	chr7	38269491	38269540
ENSG00000170465.9	KRT6C	protein_coding	-1.90414	-1.38849	0.056892	27	27	467	chr12	52468516	52473785
ENSG00000064490.13	RFXANK	protein_coding	-1.9039	-2.94452	0.0569227	6	8	84	chr19	19192229	19201869
ENSG00000159792.9	PSKH1	protein_coding	-1.90314	-11.6456	0.057022	1	1	69	chr16	67893272	67929678
ENSG00000236320.3	SLFN14	protein_coding	1.90291	0.834793	0.0570517	17	19	229	chr17	35548125	35558098
ENSG00000182566.13	CLEC4G	protein_coding	1.90268	2.00645	0.0570827	3	3	711	chr19	7728957	7733906
ENSG00000047578.12	KIAA0556	protein_coding	1.90215	16.812	0.057152	1	1	78	chr16	27550152	27780369
ENSG00000144233.9	AMMECR1L	protein_coding	-1.90207	-1.1391	0.0571615	9	9	123	chr2	127861630	127885922
ENSG00000120896.13	SORBS3	protein_coding	1.90169	4.23281	0.057212	7	8	78	chr8	22544986	22575788
ENSG00000198276.15	UCKL1	protein_coding	1.90162	3.88303	0.0572208	6	7	85	chr20	63939829	63956415
ENSG00000243498.2	UBA52P5	processed_pseudogene	1.90119	2.13322	0.0572774	3	3	71	chr8	123236852	123237062
ENSG00000068697.6	LAPTM4A	protein_coding	-1.89996	-6.61011	0.0574382	6	6	86	chr2	20032650	20052028
ENSG00000146833.15	TRIM4	protein_coding	1.89963	0.122809	0.0574819	5	5	355	chr7	99876958	99919600
ENSG00000161533.11	ACOX1	protein_coding	1.89916	0.777015	0.0575435	10	11	129	chr17	75941507	75979363
ENSG00000103472.9	RRN3P2	transcribed_unprocessed_pseudogene	-1.89912	-0.239948	0.0575485	8	8	189	chr16	29074976	29116718
ENSG00000135541.20	AHI1	protein_coding	1.89852	0.23313	0.0576272	13	13	420	chr6	135283532	135497776
ENSG00000159228.12	CBR1	protein_coding	1.89845	0.270348	0.057637	15	15	291	chr21	36069941	36073166
ENSG00000162888.4	C1orf147	antisense	1.89801	3.52354	0.0576947	2	2	437	chr1	206491116	206497728
ENSG00000170854.17	RIOX2	protein_coding	1.89777	1.83119	0.057727	8	8	102	chr3	97941818	97972457
ENSG00000215533.8	LINC00189	sense_overlapping	1.89748	0.21214	0.0577642	2	2	222	chr21	29193480	29288205
ENSG00000156711.16	MAPK13	protein_coding	-1.89718	-1.03083	0.0578037	29	29	275	chr6	36127809	36144524
ENSG00000172057.9	ORMDL3	protein_coding	-1.89698	-0.119507	0.057831	1	1	117	chr17	39921041	39927601
ENSG00000113532.12	ST8SIA4	protein_coding	1.89662	9.22012	0.0578784	2	2	140	chr5	100806935	100903266
ENSG00000050165.17	DKK3	protein_coding	-1.89532	-0.879158	0.0580498	14	14	196	chr11	11963106	12009769
ENSG00000228748.2	RP13-39P12.3	antisense	-1.89464	-1.34053	0.05814	12	12	118	chr10	77782866	77793176
ENSG00000176533.12	GNG7	protein_coding	-1.89453	-0.538773	0.0581546	19	19	217	chr19	2511219	2702709
ENSG00000175170.14	FAM182B	protein_coding	1.89377	0.298094	0.0582558	9	9	422	chr20	25763466	25868225
ENSG00000186866.16	POFUT2	protein_coding	-1.89337	-85.94	0.0583092	2	2	135	chr21	45263928	45287898
ENSG00000121690.10	DEPDC7	protein_coding	1.89329	1.09666	0.058319	1	1	135	chr11	33015864	33033582
ENSG00000010219.13	DYRK4	protein_coding	1.89291	0.279925	0.0583694	11	11	128	chr12	4562204	4615302
ENSG00000248593.3	DSTNP2	transcribed_unprocessed_pseudogene	1.89233	21.2623	0.058447	1	1	111	chr12	6884682	6885786
ENSG00000240370.6	RPL13P5	transcribed_processed_pseudogene	-1.89233	-149.822	0.058447	1	1	155	chr12	6873389	6884741
ENSG00000019995.6	ZRANB1	protein_coding	1.8923	439.293	0.058451	1	1	68	chr10	124942123	124988189
ENSG00000182310.13	SPACA6	protein_coding	-1.89223	-0.892519	0.0584604	9	11	111	chr19	51693496	51712387
ENSG00000172716.16	SLFN11	protein_coding	1.89173	2.84519	0.0585269	6	6	141	chr17	35350305	35373701
ENSG00000183426.16	NPIPA1	protein_coding	1.89154	0.425405	0.0585518	10	10	378	chr16	14937414	14952056
ENSG00000160221.16	C21orf33	protein_coding	-1.89136	-0.119294	0.0585761	63	66	566	chr21	44133605	44145723
ENSG00000132478.9	UNK	protein_coding	1.89053	2.60189	0.0586875	4	5	92	chr17	75784771	75825799
ENSG00000170234.12	PWWP2A	protein_coding	-1.89015	-3.50987	0.0587379	12	12	112	chr5	160061801	160119423
ENSG00000206249.3	CTD-2308N23.2	antisense	1.88993	0.320589	0.0587668	16	19	44	chr20	38288331	38326536
ENSG00000177613.8	CSTF2T	protein_coding	-1.88881	-1.31058	0.0589175	17	17	124	chr10	51695487	51699591
ENSG00000187762.5	HSPE1P11	processed_pseudogene	-1.88875	-10.7594	0.0589253	6	7	189	chr6	35023522	35023831
ENSG00000143368.9	SF3B4	protein_coding	-1.88872	-10.4968	0.058929	3	3	45	chr1	149923317	149928344
ENSG00000003436.15	TFPI	protein_coding	1.88867	2.07481	0.058936	8	8	185	chr2	187464230	187565760
ENSG00000110955.8	ATP5B	protein_coding	1.88828	4.61328	0.0589884	2	3	74	chr12	56638175	56646068
ENSG00000198369.9	SPRED2	protein_coding	1.88758	2.03198	0.0590829	8	8	64	chr2	65310851	65432637
ENSG00000158373.8	HIST1H2BD	protein_coding	1.88642	14.6264	0.059238	2	3	100	chr6	26158146	26171349
ENSG00000176239.7	OR51B6	protein_coding	-1.88619	-1.51289	0.05927	3	5	18	chr11	5351508	5352446
ENSG00000162645.12	GBP2	protein_coding	1.88608	2.42872	0.0592841	7	7	67	chr1	89106132	89150456
ENSG00000125870.10	SNRPB2	protein_coding	1.88563	3.80277	0.0593446	6	7	99	chr20	16729961	16742563
ENSG00000115271.10	GCA	protein_coding	-1.88521	-4.92252	0.059401	8	8	51	chr2	162318840	162371595
ENSG00000179104.8	TMTC2	protein_coding	-1.88519	-2.40336	0.0594045	15	15	217	chr12	82686880	83134870
ENSG00000141642.8	ELAC1	protein_coding	1.8851	7.10686	0.059416	1	1	132	chr18	50967991	50988121
ENSG00000107821.14	KAZALD1	protein_coding	-1.88499	-6.27806	0.0594318	4	4	70	chr10	101061841	101068131
ENSG00000057704.12	TMCC3	protein_coding	1.88429	2.72134	0.0595263	15	15	188	chr12	94567124	94650562
ENSG00000223865.10	HLA-DPB1	protein_coding	-1.88415	-92.7422	0.0595453	3	3	262	chr6	33075926	33087201
ENSG00000164010.13	ERMAP	protein_coding	1.88409	0.842124	0.0595528	18	20	235	chr1	42817124	42844989
ENSG00000138594.13	TMOD3	protein_coding	-1.88329	-0.962855	0.0596605	11	11	130	chr15	51829628	51947295
ENSG00000213741.9	RPS29	protein_coding	1.88294	3.54695	0.0597085	11	11	99	chr14	49570984	49599164
ENSG00000260592.1	CTA-363E6.6	antisense	-1.88283	-18.8155	0.0597238	3	5	147	chr16	19476916	19487899
ENSG00000136274.8	NACAD	protein_coding	1.8827	0.419664	0.0597407	2	3	154	chr7	45080438	45088914
ENSG00000089356.18	FXYD3	protein_coding	-1.882	-0.854487	0.0598362	10	10	84	chr19	35115879	35124324
ENSG00000119408.16	NEK6	protein_coding	1.88095	0.329953	0.0599789	12	12	131	chr9	124257606	124353307
ENSG00000197147.13	LRRC8B	protein_coding	-1.88095	-0.0793932	0.059979	6	6	221	chr1	89524836	89597864
ENSG00000102890.14	ELMO3	protein_coding	1.88084	1.43643	0.0599942	6	6	180	chr16	67199111	67204029
ENSG00000113296.14	THBS4	protein_coding	-1.88078	-0.608952	0.0600014	13	13	177	chr5	79991311	80083287
ENSG00000177981.10	ASB8	protein_coding	-1.88073	-1.29843	0.0600082	18	18	205	chr12	48147788	48181213
ENSG00000100023.18	PPIL2	protein_coding	1.87953	0.297579	0.0601716	13	15	238	chr22	21666009	21700015
ENSG00000187678.8	SPRY4	protein_coding	1.87897	5901.85	0.060248	1	1	81	chr5	142310427	142326455
ENSG00000057657.15	PRDM1	protein_coding	1.87872	2.49194	0.0602821	6	6	84	chr6	106086320	106109939
ENSG00000225329.3	LHFPL3-AS2	processed_transcript	1.87859	1.11222	0.0603002	19	19	288	chr7	104894628	104926645
ENSG00000070061.14	IKBKAP	protein_coding	-1.87848	-0.554308	0.0603149	20	20	249	chr9	108867517	108934116
ENSG00000152348.15	ATG10	protein_coding	1.87845	0.0679283	0.060319	9	9	469	chr5	81972025	82276857
ENSG00000076242.14	MLH1	protein_coding	-1.87797	-1.25159	0.0603854	10	11	167	chr3	36993332	37050918
ENSG00000127452.8	FBXL12	protein_coding	1.87758	13.3492	0.060439	1	1	51	chr19	9810267	9827816
ENSG00000221883.2	ARIH2OS	protein_coding	-1.87707	-2.28162	0.060509	2	2	59	chr3	48917788	48919385
ENSG00000130699.18	TAF4	protein_coding	-1.87668	-2.92972	0.0605614	2	2	117	chr20	61953469	62065810
ENSG00000006282.20	SPATA20	protein_coding	1.87648	0.122961	0.0605888	31	32	451	chr17	50543058	50555852
ENSG00000147364.16	FBXO25	protein_coding	-1.87562	-1.25342	0.0607079	12	14	177	chr8	406428	477967
ENSG00000189367.14	KIAA0408	protein_coding	-1.87553	-0.357129	0.0607203	9	9	152	chr6	127441048	127459391
ENSG00000204681.10	GABBR1	protein_coding	-1.87538	-15.5179	0.060741	1	3	194	chr6	29555629	29633976
ENSG00000254639.1	CTD-2589M5.5	lincRNA	-1.87509	-2.41438	0.06078	10	10	220	chr11	46238382	46239267
ENSG00000146918.19	NCAPG2	protein_coding	-1.87496	-0.438146	0.0607976	17	18	221	chr7	158631311	158704829
ENSG00000164265.8	SCGB3A2	protein_coding	-1.87455	-0.973649	0.0608552	13	13	185	chr5	147870682	147882191
ENSG00000167780.11	SOAT2	protein_coding	1.87439	0.362916	0.0608768	33	33	431	chr12	53103518	53124538
ENSG00000177885.13	GRB2	protein_coding	-1.87416	-4.27347	0.0609085	5	6	96	chr17	75318076	75405709
ENSG00000185947.14	ZNF267	protein_coding	1.8735	29.3731	0.0609988	2	2	36	chr16	31873758	31917357
ENSG00000160233.7	LRRC3	protein_coding	1.87299	0.287914	0.06107	1	1	219	chr21	44455486	44462196
ENSG00000198917.12	SPOUT1	protein_coding	1.87265	1.28685	0.0611165	4	4	264	chr9	128819651	128829821
ENSG00000105258.8	POLR2I	protein_coding	-1.87253	-2.20309	0.0611333	10	10	137	chr19	36113710	36115346
ENSG00000179958.8	DCTPP1	protein_coding	-1.87206	-3.10399	0.0611977	2	2	52	chr16	30423619	30430075
ENSG00000254649.1	RP11-452H21.2	antisense	-1.87111	-0.748626	0.0613298	5	7	13	chr11	78388061	78392405
ENSG00000248544.2	CTB-47B11.3	antisense	-1.87029	-0.238983	0.0614436	31	31	470	chr5	157375741	157384950
ENSG00000175548.8	ALG10B	protein_coding	-1.86976	-1.05984	0.0615174	3	3	248	chr12	38316578	38329728
ENSG00000229417.1	NPM1P25	processed_pseudogene	1.86931	0.730217	0.0615795	37	37	508	chr10	96189366	96190219
ENSG00000161999.11	JMJD8	protein_coding	-1.86792	-1.65693	0.0617735	9	11	167	chr16	681671	684439
ENSG00000156802.12	ATAD2	protein_coding	-1.86787	-6.0539	0.0617801	8	8	88	chr8	123319850	123416350
ENSG00000149577.15	SIDT2	protein_coding	-1.86783	-0.439988	0.0617863	2	2	146	chr11	117178733	117197445
ENSG00000131871.14	SELENOS	protein_coding	1.86698	24.0485	0.061905	1	1	102	chr15	101270817	101277450
ENSG00000077254.14	USP33	protein_coding	1.86655	11.107	0.0619648	5	5	80	chr1	77695987	77759852
ENSG00000167074.14	TEF	protein_coding	-1.86596	-0.244596	0.0620472	10	10	107	chr22	41367333	41399326
ENSG00000226352.2	PSPC1-AS2	antisense	1.86523	1.80875	0.0621496	14	15	94	chr13	19674624	19675884
ENSG00000203711.11	C6orf99	lincRNA	-1.86493	-1.00978	0.062191	37	37	497	chr6	158869939	158910353
ENSG00000169231.13	THBS3	protein_coding	-1.86427	-0.165657	0.0622839	20	20	249	chr1	155195588	155209051
ENSG00000101624.10	CEP76	protein_coding	1.86424	1.27674	0.0622881	12	16	139	chr18	12661833	12702777
ENSG00000169398.19	PTK2	protein_coding	-1.86412	-0.739791	0.0623047	15	16	146	chr8	140657900	141002216
ENSG00000167434.9	CA4	protein_coding	1.86367	3.24522	0.0623677	13	13	368	chr17	60149936	60170899
ENSG00000204397.7	CARD16	protein_coding	1.86302	3.08065	0.06246	1	1	84	chr11	105041326	105101431
ENSG00000141367.11	CLTC	protein_coding	1.86258	11.1218	0.0625207	2	2	49	chr17	59619689	59696956
ENSG00000184575.11	XPOT	protein_coding	1.86186	0.789616	0.0626224	7	7	108	chr12	64404350	64451127
ENSG00000166546.13	BEAN1	protein_coding	1.86155	0.366814	0.0626666	33	37	396	chr16	66427297	66493529
ENSG00000093167.17	LRRFIP2	protein_coding	-1.8612	-0.380089	0.062716	1	1	160	chr3	37052656	37176532
ENSG00000083812.11	ZNF324	protein_coding	1.86118	8.40348	0.062719	1	1	125	chr19	58467045	58475436
ENSG00000198089.15	SFI1	protein_coding	-1.86067	-0.266204	0.0627901	24	24	352	chr22	31488688	31618586
ENSG00000185818.7	NAT8L	protein_coding	1.86006	1.24432	0.0628775	33	38	621	chr4	2059512	2069089
ENSG00000108187.15	PBLD	protein_coding	-1.85939	-0.810739	0.0629716	20	20	240	chr10	68282660	68333049
ENSG00000102575.10	ACP5	protein_coding	-1.85935	-0.268213	0.062978	19	20	197	chr19	11574660	11579008
ENSG00000151470.12	C4orf33	protein_coding	1.85917	0.187531	0.0630032	22	25	334	chr4	129093317	129116640
ENSG00000212916.4	MAP10	protein_coding	1.85885	1.85125	0.0630479	17	17	145	chr1	232804892	232808407
ENSG00000185716.11	C16orf52	protein_coding	-1.85855	-1.78528	0.0630908	9	9	99	chr16	22007638	22087534
ENSG00000075292.18	ZNF638	protein_coding	-1.85849	-1.96718	0.0631	20	20	160	chr2	71276561	71435069
ENSG00000123810.7	B9D2	protein_coding	1.85788	15.884	0.0631855	3	3	77	chr19	41354421	41364173
ENSG00000141127.14	PRPSAP2	protein_coding	1.85767	0.598323	0.0632158	15	17	219	chr17	18840085	18931287
ENSG00000228446.2	AC073052.1	processed_pseudogene	1.85731	0.3332	0.0632665	23	24	246	chr2	224499387	224500100
ENSG00000100504.16	PYGL	protein_coding	1.85717	1.56027	0.0632867	22	22	231	chr14	50857891	50944736
ENSG00000114796.15	KLHL24	protein_coding	-1.8566	-1.53794	0.0633683	15	15	119	chr3	183635568	183684477
ENSG00000173114.12	LRRN3	protein_coding	-1.85628	-1.20241	0.0634143	9	9	105	chr7	111091006	111125454
ENSG00000104408.9	EIF3E	protein_coding	-1.85501	-1.76119	0.0635946	2	2	118	chr8	108201743	108435333
ENSG00000184058.12	TBX1	protein_coding	1.85478	22.0099	0.063627	2	2	573	chr22	19756703	19783593
ENSG00000090905.18	TNRC6A	protein_coding	1.85357	0.508195	0.0638001	13	13	84	chr16	24610209	24827632
ENSG00000054148.17	PHPT1	protein_coding	-1.85308	-4.701	0.0638702	5	7	64	chr9	136848724	136851027
ENSG00000157227.12	MMP14	protein_coding	1.85302	9.67292	0.063879	1	1	86	chr14	22836557	22849027
ENSG00000260517.2	RP11-426C22.5	lincRNA	-1.85294	-0.256402	0.0638914	11	12	285	chr16	29116127	29217860
ENSG00000150995.18	ITPR1	protein_coding	1.8517	1.09292	0.0640689	10	11	149	chr3	4493348	4847840
ENSG00000100448.3	CTSG	protein_coding	-1.85151	-1.11146	0.0640963	26	29	534	chr14	24573556	24576260
ENSG00000245532.7	NEAT1	lincRNA	-1.85133	-0.28887	0.0641221	12	12	298	chr11	65422774	65445540
ENSG00000198576.3	ARC	protein_coding	1.85123	0.709655	0.064137	1	1	129	chr8	142611044	142614472
ENSG00000079785.14	DDX1	protein_coding	-1.85117	-1.51889	0.0641445	17	22	238	chr2	15591178	15631111
ENSG00000108798.8	ABI3	protein_coding	1.8511	3.19386	0.0641548	12	12	96	chr17	49210227	49223225
ENSG00000187730.8	GABRD	protein_coding	-1.85109	-2.90356	0.064157	1	1	736	chr1	2019298	2030758
ENSG00000168234.12	TTC39C	protein_coding	1.85106	0.522209	0.0641608	15	15	129	chr18	23992773	24135610
ENSG00000204256.12	BRD2	protein_coding	-1.85078	-1.27127	0.0642011	19	25	252	chr6	32968660	32981505
ENSG00000066336.11	SPI1	protein_coding	1.84987	31.7322	0.0643324	4	4	59	chr11	47354860	47378576
ENSG00000260304.1	RP11-388M20.6	antisense	1.84808	0.376756	0.0645902	11	11	157	chr16	31182511	31183285
ENSG00000174292.12	TNK1	protein_coding	1.84785	1.66976	0.0646243	8	9	115	chr17	7380534	7389774
ENSG00000196284.15	SUPT3H	protein_coding	-1.84754	-0.294162	0.0646691	38	38	415	chr6	44809317	45377953
ENSG00000155542.11	SETD9	protein_coding	-1.84706	-0.0723717	0.0647384	18	19	450	chr5	56909260	56925532
ENSG00000167792.11	NDUFV1	protein_coding	-1.8467	-12.6845	0.0647902	8	8	172	chr11	67606852	67612535
ENSG00000160766.14	GBAP1	transcribed_unprocessed_pseudogene	1.84635	0.164704	0.064842	7	7	238	chr1	155213825	155227422
ENSG00000168899.4	VAMP5	protein_coding	1.84632	3.1887	0.064845	5	5	102	chr2	85584408	85593412
ENSG00000180846.8	CSNK1G2-AS1	antisense	-1.84625	-1.09553	0.064856	21	23	584	chr19	1952531	1954586
ENSG00000172543.7	CTSW	protein_coding	1.84615	0.437272	0.064871	18	18	247	chr11	65879809	65883741
ENSG00000153037.13	SRP19	protein_coding	-1.84608	-0.440948	0.06488	1	1	139	chr5	112861222	112869788
ENSG00000213689.11	TREX1	protein_coding	-1.846	-0.395975	0.0648917	10	10	208	chr3	48465811	48467645
ENSG00000137500.9	CCDC90B	protein_coding	1.84553	1.23627	0.0649598	2	2	212	chr11	83259097	83286407
ENSG00000181274.6	FRAT2	protein_coding	1.84542	0.627193	0.0649758	7	7	109	chr10	97332497	97334709
ENSG00000157212.18	PAXIP1	protein_coding	1.84535	74.4474	0.064986	1	1	118	chr7	154943687	155003084
ENSG00000181444.12	ZNF467	protein_coding	1.84491	3.15449	0.0650509	15	15	211	chr7	149764182	149773479
ENSG00000177034.14	MTX3	protein_coding	1.84398	1.08161	0.0651868	11	11	79	chr5	79976731	79991262
ENSG00000123360.11	PDE1B	protein_coding	1.84355	0.809965	0.0652488	11	11	141	chr12	54549350	54579239
ENSG00000138411.10	HECW2	protein_coding	-1.84306	-1.5214	0.06532	5	5	126	chr2	196194370	196593692
ENSG00000205765.8	C5orf51	protein_coding	1.84236	0.508957	0.065423	10	11	39	chr5	41904188	41921636
ENSG00000228589.3	SPCS2P4	processed_pseudogene	1.84188	11.6694	0.065492	1	1	90	chr1	28095742	28096422
ENSG00000260487.1	RP11-297C4.3	antisense	1.84156	0.937992	0.0655393	8	9	159	chr16	30480588	30481346
ENSG00000140299.11	BNIP2	protein_coding	-1.84088	-1.96831	0.0656386	4	4	77	chr15	59659146	59689534
ENSG00000164830.18	OXR1	protein_coding	-1.84014	-2.19497	0.0657475	8	8	130	chr8	106359476	106752694
ENSG00000239306.4	RBM14	protein_coding	-1.83997	-3.01082	0.0657734	6	6	69	chr11	66616582	66627347
ENSG00000162585.16	FAAP20	protein_coding	1.83884	0.70564	0.0659384	20	21	358	chr1	2184461	2212720
ENSG00000100105.17	PATZ1	protein_coding	-1.83876	-2.0054	0.0659512	10	10	100	chr22	31325804	31346232
ENSG00000104524.13	PYCRL	protein_coding	-1.83781	-11.5948	0.06609	1	1	193	chr8	143603913	143609773
ENSG00000129009.12	ISLR	protein_coding	1.83761	1.17983	0.0661206	8	8	98	chr15	74173671	74176872
ENSG00000223969.5	AC002456.2	antisense	-1.83759	-0.223026	0.0661225	19	19	423	chr7	90590619	90597353
ENSG00000078747.14	ITCH	protein_coding	-1.8375	-70.0247	0.066136	1	1	76	chr20	34363235	34511393
ENSG00000012171.19	SEMA3B	protein_coding	1.83746	3331.5	0.066142	1	1	77	chr3	50267558	50277546
ENSG00000114395.10	CYB561D2	protein_coding	-1.83746	-11.6446	0.066142	1	1	119	chr3	50350695	50358460
ENSG00000099326.8	MZF1	protein_coding	-1.8373	-2.93516	0.0661651	5	5	75	chr19	58561932	58573575
ENSG00000095303.14	PTGS1	protein_coding	-1.8371	-3.88474	0.0661946	6	6	119	chr9	122370530	122395703
ENSG00000172955.17	ADH6	protein_coding	-1.83657	-0.84669	0.066273	30	30	368	chr4	99202638	99219537
ENSG00000265907.1	RP11-737O24.2	antisense	1.83634	38.6749	0.066308	1	1	52	chr18	2948238	2960756
ENSG00000122641.10	INHBA	protein_coding	1.8348	1.99432	0.0665351	10	10	76	chr7	41667168	41705834
ENSG00000016391.10	CHDH	protein_coding	-1.83449	-2.68027	0.0665815	9	9	175	chr3	53812335	53846390
ENSG00000222046.2	DCDC2B	protein_coding	-1.83336	-0.779403	0.0667485	20	20	400	chr1	32209094	32216196
ENSG00000185917.13	SETD4	protein_coding	1.83291	0.615316	0.0668158	18	19	273	chr21	36034541	36079389
ENSG00000142910.15	TINAGL1	protein_coding	1.83274	4.81324	0.0668412	5	5	70	chr1	31576485	31587686
ENSG00000080608.9	PUM3	protein_coding	-1.83164	-2.0454	0.0670058	12	12	173	chr9	2720469	2844241
ENSG00000174885.12	NLRP6	protein_coding	1.83159	0.481884	0.0670118	20	24	360	chr11	278365	285359
ENSG00000069943.9	PIGB	protein_coding	-1.83063	-0.647389	0.0671554	11	12	374	chr15	55318960	55355648
ENSG00000133067.17	LGR6	protein_coding	-1.82944	-1.61761	0.0673339	2	2	462	chr1	202193901	202319781
ENSG00000161955.16	TNFSF13	protein_coding	-1.82904	-2.4308	0.0673933	8	8	90	chr17	7558292	7561608
ENSG00000179889.18	PDXDC1	protein_coding	1.82898	0.822538	0.0674028	14	18	202	chr16	14974591	15139339
ENSG00000250132.6	RP11-359B12.2	antisense	1.82885	1.44577	0.0674228	4	4	169	chr12	974133	991190
ENSG00000183172.8	SMDT1	protein_coding	-1.82846	-0.141614	0.0674799	12	12	438	chr22	42079691	42084284
ENSG00000119383.19	PTPA	protein_coding	-1.8275	-0.710549	0.0676251	11	11	187	chr9	129110950	129148946
ENSG00000179846.9	NKPD1	protein_coding	1.82718	0.504429	0.0676724	47	48	607	chr19	45149750	45158737
ENSG00000006625.17	GGCT	protein_coding	1.82681	2.41885	0.067728	1	1	152	chr7	30496621	30504844
ENSG00000167895.14	TMC8	protein_coding	1.8268	1.08785	0.0677292	3	3	733	chr17	78130770	78142968
ENSG00000112576.12	CCND3	protein_coding	-1.8265	-2.3677	0.0677755	13	13	124	chr6	41934933	42050357
ENSG00000242814.2	RP11-436H11.1	processed_pseudogene	-1.82641	-1.13004	0.067789	28	29	412	chr5	124808828	124809233
ENSG00000115884.10	SDC1	protein_coding	1.82636	1.19789	0.0677967	17	17	196	chr2	20200797	20225433
ENSG00000123836.14	PFKFB2	protein_coding	1.82635	9.30459	0.0677969	3	4	72	chr1	207034366	207081024
ENSG00000213676.10	ATF6B	protein_coding	-1.82633	-0.503562	0.0678011	21	21	436	chr6	32098176	32128253
ENSG00000183298.5	RPSAP19	processed_pseudogene	1.82533	3.15947	0.0679517	7	8	126	chr1	101786340	101787219
ENSG00000131508.15	UBE2D2	protein_coding	1.82511	0.335946	0.0679847	20	24	49	chr5	139526431	139628433
ENSG00000135297.15	MTO1	protein_coding	1.82354	0.192866	0.0682218	13	13	244	chr6	73461578	73509236
ENSG00000185155.11	MIXL1	protein_coding	1.82206	3.6809	0.0684466	2	2	336	chr1	226223618	226227054
ENSG00000106771.12	TMEM245	protein_coding	-1.82162	-0.314912	0.0685122	35	35	302	chr9	109015152	109119945
ENSG00000049540.16	ELN	protein_coding	1.82085	2.58913	0.06863	2	3	49	chr7	74027789	74069907
ENSG00000152377.13	SPOCK1	protein_coding	1.82083	1.57439	0.068632	3	3	105	chr5	136975298	137598379
ENSG00000161180.10	CCDC116	protein_coding	-1.82078	-0.524783	0.0686404	2	3	190	chr22	21632716	21637327
ENSG00000166747.12	AP1G1	protein_coding	-1.82028	-1.06441	0.0687159	11	11	133	chr16	71729000	71809201
ENSG00000224177.6	LINC00570	lincRNA	-1.81986	-18.3802	0.068781	1	1	373	chr2	11393981	11403077
ENSG00000248099.3	INSL3	protein_coding	1.81962	0.723065	0.0688171	23	24	591	chr19	17816512	17821574
ENSG00000124701.5	APOBEC2	protein_coding	-1.81946	-1.10358	0.0688409	11	11	105	chr6	41053304	41064511
ENSG00000010244.18	ZNF207	protein_coding	1.81891	14.572	0.0689245	5	5	60	chr17	32350117	32381886
ENSG00000179152.19	TCAIM	protein_coding	1.81884	3.1161	0.068936	11	11	169	chr3	44338119	44409451
ENSG00000199631.1	SNORD33	snoRNA	-1.81853	-3.3898	0.0689829	13	14	335	chr19	49490615	49490699
ENSG00000173559.12	NABP1	protein_coding	1.81843	2.51865	0.0689982	6	6	83	chr2	191678127	191696659
ENSG00000265787.2	CYP4F35P	transcribed_unprocessed_pseudogene	1.81842	0.876188	0.069	1	2	630	chr18	14337423	14342524
ENSG00000186152.6	LILRP1	unprocessed_pseudogene	-1.81838	-4.69904	0.0690056	4	5	146	chr19	54696604	54700905
ENSG00000188529.14	SRSF10	protein_coding	-1.81828	-7.29325	0.0690215	9	9	114	chr1	23964804	23980927
ENSG00000138942.15	RNF185	protein_coding	1.81788	0.255198	0.0690822	21	21	213	chr22	31160193	31207019
ENSG00000125995.15	ROMO1	protein_coding	1.81617	164.427	0.069344	1	1	45	chr20	35699272	35700984
ENSG00000102743.14	SLC25A15	protein_coding	-1.81587	-1.10337	0.0693906	20	20	150	chr13	40789412	40810111
ENSG00000162734.12	PEA15	protein_coding	-1.81575	-1.62163	0.069409	5	6	94	chr1	160205337	160215376
ENSG00000106526.10	ACTR3C	protein_coding	-1.81508	-0.761281	0.069512	1	1	263	chr7	150243916	150323725
ENSG00000173137.11	ADCK5	protein_coding	-1.81464	-1.12253	0.0695796	8	9	126	chr8	144373101	144393242
ENSG00000115685.14	PPP1R7	protein_coding	1.81427	5.2687	0.0696358	12	15	152	chr2	241149576	241183652
ENSG00000174132.8	FAM174A	protein_coding	-1.81393	-1.50031	0.0696878	6	6	80	chr5	100535305	100586741
ENSG00000179598.5	PLD6	protein_coding	1.81325	0.227035	0.069793	11	12	185	chr17	17200995	17206315
ENSG00000177600.8	RPLP2	protein_coding	1.81285	5.31547	0.0698557	18	21	158	chr11	809647	812880
ENSG00000090674.15	MCOLN1	protein_coding	1.81277	20.5825	0.0698676	5	5	58	chr19	7522626	7534009
ENSG00000197815.4	RP1-253P7.4	antisense	1.81271	0.77067	0.0698762	10	10	177	chr17	17858227	17860041
ENSG00000089505.17	CMTM1	protein_coding	-1.81233	-1.93593	0.0699359	6	6	71	chr16	66566393	66579137
ENSG00000166347.18	CYB5A	protein_coding	1.81072	1.18576	0.0701846	8	8	211	chr18	74250847	74292016
ENSG00000259298.1	RP11-562A8.4	antisense	1.81048	2.77555	0.0702215	6	6	79	chr15	50497195	50498744
ENSG00000204264.8	PSMB8	protein_coding	-1.81047	-30.7828	0.0702225	2	2	132	chr6	32840717	32844703
ENSG00000115053.15	NCL	protein_coding	1.81007	2.17437	0.0702843	8	8	78	chr2	231453531	231464594
ENSG00000117676.13	RPS6KA1	protein_coding	1.80953	4.68821	0.0703692	6	6	79	chr1	26529761	26575030
ENSG00000183696.13	UPP1	protein_coding	1.80889	3.50982	0.0704678	12	13	111	chr7	48088628	48108733
ENSG00000067221.13	STOML1	protein_coding	1.8078	0.368119	0.0706374	17	17	249	chr15	73978923	73994622
ENSG00000159409.14	CELF3	protein_coding	-1.80778	-1.33605	0.0706414	17	17	355	chr1	151702404	151716814
ENSG00000005238.19	FAM214B	protein_coding	-1.80771	-3.84137	0.0706517	8	8	114	chr9	35104112	35116341
ENSG00000197136.4	PCNX3	protein_coding	-1.80761	-3.22359	0.0706668	6	6	124	chr11	65615773	65637439
ENSG00000120437.8	ACAT2	protein_coding	1.80749	1.03171	0.0706853	15	16	117	chr6	159760328	159779055
ENSG00000103145.10	HCFC1R1	protein_coding	-1.80667	-2.72384	0.0708139	6	7	75	chr16	3022620	3024286
ENSG00000225830.12	ERCC6	protein_coding	1.80578	1.71818	0.0709522	7	7	168	chr10	49455368	49539538
ENSG00000171723.15	GPHN	protein_coding	1.80552	4.05353	0.0709939	6	6	169	chr14	66507407	67181803
ENSG00000175274.18	TP53I11	protein_coding	1.80532	26.4214	0.071024	1	1	111	chr11	44885903	44951306
ENSG00000188452.13	CERKL	protein_coding	1.80509	1.74613	0.071061	7	7	92	chr2	181536676	181680665
ENSG00000132912.12	DCTN4	protein_coding	-1.805	-2.21188	0.0710741	8	8	102	chr5	150708440	150759109
ENSG00000144668.11	ITGA9	protein_coding	-1.80372	-0.278586	0.0712751	10	10	92	chr3	37452115	37823514
ENSG00000231665.1	OGFOD1P1	processed_pseudogene	1.80332	0.778697	0.0713375	14	14	298	chr13	49210422	49212294
ENSG00000122591.11	FAM126A	protein_coding	-1.80249	-1.71583	0.0714687	14	14	207	chr7	22889371	23014130
ENSG00000123472.12	ATPAF1	protein_coding	1.80245	3.43459	0.0714739	3	3	63	chr1	46632737	46673867
ENSG00000013583.8	HEBP1	protein_coding	1.80221	0.192357	0.0715126	11	11	176	chr12	12974864	13000273
ENSG00000198342.9	ZNF442	protein_coding	-1.80177	-1.04688	0.0715811	4	4	49	chr19	12345949	12365905
ENSG00000152234.15	ATP5A1	protein_coding	-1.80171	-0.432324	0.0715909	10	10	107	chr18	46080248	46104334
ENSG00000183281.14	PLGLB1	protein_coding	1.80139	0.156998	0.0716412	7	8	369	chr2	87002559	87021852
ENSG00000108774.14	RAB5C	protein_coding	1.80105	2.7584	0.0716952	9	9	119	chr17	42124976	42155044
ENSG00000260086.2	RP11-42I10.1	lincRNA	1.80087	1.56786	0.0717236	22	22	516	chr16	48623436	48744921
ENSG00000139436.20	GIT2	protein_coding	-1.80058	-4.27017	0.0717695	7	8	121	chr12	109929792	109996389
ENSG00000182628.12	SKA2	protein_coding	1.80022	1.47742	0.0718254	6	6	170	chr17	59109951	59155269
ENSG00000089063.14	TMEM230	protein_coding	1.80009	0.227637	0.0718457	5	8	391	chr20	5068232	5113103
ENSG00000149806.10	FAU	protein_coding	1.80005	6.8758	0.0718529	6	6	95	chr11	65120628	65122473
ENSG00000197603.13	C5orf42	protein_coding	-1.7999	-19.2487	0.071877	4	4	96	chr5	37106228	37249428
ENSG00000164754.14	RAD21	protein_coding	1.79966	2.99974	0.0719136	6	6	126	chr8	116845935	116874866
ENSG00000025293.16	PHF20	protein_coding	-1.79963	-8.44357	0.0719187	5	5	100	chr20	35771974	35950381
ENSG00000159166.13	LAD1	protein_coding	1.79956	0.774933	0.0719304	25	25	499	chr1	201373244	201399915
ENSG00000178718.6	RPP25	protein_coding	1.79916	1.78207	0.0719939	5	5	164	chr15	74954416	74957464
ENSG00000104361.9	NIPAL2	protein_coding	1.7986	0.48615	0.0720825	13	13	175	chr8	98189833	98294393
ENSG00000170296.9	GABARAP	protein_coding	1.79837	10.1067	0.0721187	7	7	52	chr17	7240014	7242770
ENSG00000137815.14	RTF1	protein_coding	1.79828	4.5671	0.0721327	5	5	83	chr15	41408408	41483563
ENSG00000120341.18	SEC16B	protein_coding	1.79799	1.59288	0.0721788	10	10	155	chr1	177923956	177984303
ENSG00000146707.14	POMZP3	protein_coding	1.79792	0.130693	0.0721899	18	18	458	chr7	76609986	76627261
ENSG00000120029.12	C10orf76	protein_coding	1.79763	2.18954	0.0722354	4	4	118	chr10	101845599	102056193
ENSG00000105866.13	SP4	protein_coding	-1.79669	-1.68352	0.0723849	15	15	124	chr7	21428034	21514822
ENSG00000108771.12	DHX58	protein_coding	1.79665	0.864136	0.0723906	19	19	240	chr17	42101404	42112733
ENSG00000223855.1	HRAT92	lincRNA	-1.79653	-0.291186	0.07241	30	47	458	chr7	520391	525232
ENSG00000116580.18	GON4L	protein_coding	-1.79608	-3.86984	0.0724824	9	10	63	chr1	155749662	155859400
ENSG00000185130.5	HIST1H2BL	protein_coding	1.79582	26.4981	0.072523	1	1	139	chr6	27807444	27807931
ENSG00000198604.10	BAZ1A	protein_coding	1.79545	14.0905	0.072582	4	4	115	chr14	34752731	34875647
ENSG00000141524.15	TMC6	protein_coding	-1.79511	-1.59006	0.0726361	20	21	174	chr17	78110458	78132407
ENSG00000164190.17	NIPBL	protein_coding	1.79452	551.874	0.07273	1	1	71	chr5	36876759	37066413
ENSG00000161217.11	PCYT1A	protein_coding	-1.79412	-1.73403	0.0727945	20	21	188	chr3	196214222	196287957
ENSG00000254858.9	MPV17L2	protein_coding	1.79397	0.415837	0.072818	1	1	134	chr19	18193182	18196742
ENSG00000142937.11	RPS8	protein_coding	-1.79336	-4.66274	0.0729146	9	9	208	chr1	44775251	44778779
ENSG00000066855.15	MTFR1	protein_coding	1.79253	1.62149	0.0730483	12	12	199	chr8	65644734	65771261
ENSG00000129993.14	CBFA2T3	protein_coding	1.79186	1.10248	0.0731562	27	29	766	chr16	88874858	88977204
ENSG00000170264.12	FAM161A	protein_coding	1.79112	3.2478	0.0732734	9	9	142	chr2	61824854	61854143
ENSG00000083838.15	ZNF446	protein_coding	-1.79052	-1.56174	0.0733711	2	2	121	chr19	58474017	58481230
ENSG00000156976.16	EIF4A2	protein_coding	-1.79014	-6.0736	0.0734309	7	7	101	chr3	186783205	186789900
ENSG00000136485.14	DCAF7	protein_coding	1.78986	3.02997	0.0734767	8	8	144	chr17	63550461	63594266
ENSG00000145335.15	SNCA	protein_coding	1.78928	0.757841	0.073569	12	12	94	chr4	89724099	89838315
ENSG00000156869.12	FRRS1	protein_coding	1.78926	0.291838	0.0735725	17	17	539	chr1	99708703	99765793
ENSG00000155850.7	SLC26A2	protein_coding	-1.78902	-5.66306	0.0736109	4	4	75	chr5	149960737	149993455
ENSG00000066279.17	ASPM	protein_coding	-1.78759	-5.55644	0.073842	8	8	398	chr1	197084128	197146694
ENSG00000074696.12	HACD3	protein_coding	-1.78756	-0.770683	0.0738464	6	6	100	chr15	65530418	65578352
ENSG00000213020.9	ZNF611	protein_coding	-1.78651	-6.58244	0.0740175	4	4	171	chr19	52702813	52735073
ENSG00000163131.10	CTSS	protein_coding	1.78635	0.573049	0.0740423	9	9	276	chr1	150730196	150765957
ENSG00000111605.16	CPSF6	protein_coding	1.78569	2.05278	0.0741492	14	14	98	chr12	69239537	69274358
ENSG00000214954.8	LRRC69	protein_coding	1.78556	0.339334	0.0741697	8	8	149	chr8	91101832	91219236
ENSG00000260495.1	RP11-55K13.1	antisense	-1.78525	-2.34228	0.0742213	8	8	68	chr16	81310731	81313423
ENSG00000119013.8	NDUFB3	protein_coding	-1.7848	-4.94081	0.0742934	8	8	72	chr2	201071433	201085750
ENSG00000158966.13	CACHD1	protein_coding	1.78473	0.505693	0.0743045	27	28	534	chr1	64470792	64693058
ENSG00000134086.7	VHL	protein_coding	1.78417	9.59774	0.0743968	3	3	98	chr3	10141008	10152220
ENSG00000182095.14	TNRC18	protein_coding	1.78409	4.52168	0.0744092	7	7	107	chr7	5306790	5425414
ENSG00000198743.6	SLC5A3	protein_coding	1.78402	1.5507	0.0744205	9	9	120	chr21	34073570	34106262
ENSG00000141096.4	DPEP3	protein_coding	-1.78364	-1.51851	0.0744829	14	14	379	chr16	67975663	67980829
ENSG00000048028.11	USP28	protein_coding	-1.7822	-4.40291	0.074717	15	15	157	chr11	113797874	113875570
ENSG00000267117.1	AC010525.4	antisense	1.78184	1.1175	0.0747749	36	38	661	chr19	55694118	55694558
ENSG00000004455.16	AK2	protein_coding	1.78164	3.61204	0.0748086	7	7	82	chr1	33007940	33080996
ENSG00000134001.12	EIF2S1	protein_coding	1.7814	2.99803	0.0748476	7	7	125	chr14	67359997	67386516
ENSG00000177963.14	RIC8A	protein_coding	1.7808	0.334478	0.0749446	12	15	211	chr11	207511	215113
ENSG00000169908.11	TM4SF1	protein_coding	1.77899	2.13878	0.0752417	6	6	77	chr3	149369022	149377865
ENSG00000204054.13	LINC00963	processed_transcript	-1.77891	-0.347993	0.0752553	26	27	292	chr9	129483451	129513686
ENSG00000181513.14	ACBD4	protein_coding	-1.77857	-0.308499	0.0753107	11	11	166	chr17	45132600	45144181
ENSG00000108395.13	TRIM37	protein_coding	-1.77765	-0.0732628	0.0754617	4	4	180	chr17	58982638	59106921
ENSG00000189144.13	ZNF573	protein_coding	1.77713	1.88747	0.0755477	5	5	107	chr19	37735833	37817300
ENSG00000197238.4	HIST1H4J	protein_coding	-1.77667	-5.10046	0.0756231	3	3	119	chr6	27824108	27824480
ENSG00000169031.18	COL4A3	protein_coding	1.77585	1.63813	0.0757578	7	8	179	chr2	227164565	227314792
ENSG00000135447.16	PPP1R1A	protein_coding	1.77576	2.79871	0.075772	4	4	68	chr12	54575387	54588659
ENSG00000130635.15	COL5A1	protein_coding	1.77519	1.9737	0.075866	8	9	87	chr9	134641774	134844843
ENSG00000164104.11	HMGB2	protein_coding	1.77511	33.3502	0.075879	3	3	82	chr4	173331695	173335125
ENSG00000196981.3	WDR5B	protein_coding	-1.77505	-0.359524	0.0758902	14	14	197	chr3	122412332	122416051
ENSG00000216331.2	HIST1H1PS1	unprocessed_pseudogene	-1.77498	-85.9603	0.075902	1	1	401	chr6	26195554	26196633
ENSG00000101443.17	WFDC2	protein_coding	1.77485	2.55408	0.075922	2	3	116	chr20	45469706	45481532
ENSG00000119041.10	GTF3C3	protein_coding	1.77462	1.031	0.0759605	8	8	77	chr2	196763032	196799725
ENSG00000235908.1	RHOA-IT1	sense_intronic	-1.77427	-1.34621	0.076018	7	7	246	chr3	49365145	49367006
ENSG00000167850.3	CD300C	protein_coding	-1.77421	-0.702478	0.076029	38	38	640	chr17	74541108	74546143
ENSG00000160410.14	SHKBP1	protein_coding	-1.77403	-4.25006	0.0760581	9	10	117	chr19	40576851	40591399
ENSG00000100351.16	GRAP2	protein_coding	-1.77398	-1.33327	0.0760659	28	30	478	chr22	39901082	39973721
ENSG00000260325.1	HSPB9	protein_coding	1.77395	3.04854	0.0760718	7	7	72	chr17	42121431	42123352
ENSG00000245017.2	RP11-181C3.1	lincRNA	1.77363	2.97598	0.0761237	4	4	443	chr12	98485544	98503855
ENSG00000110395.6	CBL	protein_coding	1.77279	7.82189	0.0762638	2	2	111	chr11	119206276	119313926
ENSG00000101190.12	TCFL5	protein_coding	-1.77268	-0.469177	0.0762824	40	40	319	chr20	62841115	62861763
ENSG00000197694.15	SPTAN1	protein_coding	-1.7723	-3.38715	0.076344	8	8	82	chr9	128552558	128633662
ENSG00000172789.3	HOXC5	protein_coding	-1.77209	-1.61706	0.0763795	15	16	334	chr12	54032853	54035358
ENSG00000157500.10	APPL1	protein_coding	1.77154	2.81224	0.0764707	12	12	96	chr3	57227737	57273468
ENSG00000077782.19	FGFR1	protein_coding	1.77147	11.581	0.076482	1	1	99	chr8	38411138	38468834
ENSG00000171867.16	PRNP	protein_coding	1.77105	1.98151	0.0765527	18	20	215	chr20	4686236	4701590
ENSG00000103253.17	HAGHL	protein_coding	-1.77097	-2.0585	0.076566	1	1	162	chr16	726936	735525
ENSG00000204622.11	HLA-J	transcribed_unprocessed_pseudogene	-1.77041	-0.0646836	0.0766597	13	14	449	chr6	30005971	30009956
ENSG00000211720.3	TRBV11-1	TR_V_gene	1.76992	0.202477	0.0767397	18	19	36	chr7	142407672	142408136
ENSG00000245888.6	FLJ21408	antisense	-1.76959	-279.072	0.076796	1	1	621	chr16	27268205	27290492
ENSG00000109790.16	KLHL5	protein_coding	1.76929	0.94293	0.0768457	13	15	184	chr4	39045039	39126857
ENSG00000180867.10	PDIA3P1	processed_pseudogene	-1.76927	-3.62507	0.076849	1	1	158	chr1	147178113	147179622
ENSG00000104957.13	CCDC130	protein_coding	1.76898	1.53072	0.0768978	7	7	97	chr19	13731760	13763296
ENSG00000206680.1	SNORD21	snoRNA	-1.76888	-2.76311	0.076914	12	12	352	chr1	92837289	92837383
ENSG00000172273.12	HINFP	protein_coding	1.76728	0.264854	0.0771809	2	2	124	chr11	119121587	119136044
ENSG00000005175.9	RPAP3	protein_coding	1.76702	18.4399	0.0772245	2	2	96	chr12	47661249	47706061
ENSG00000204713.10	TRIM27	protein_coding	-1.76664	-0.222556	0.077288	11	11	277	chr6	28903002	28923989
ENSG00000148384.12	INPP5E	protein_coding	-1.76648	-2.93665	0.0773151	8	8	340	chr9	136428619	136439823
ENSG00000185085.2	INTS5	protein_coding	1.76555	5.63262	0.0774716	2	2	104	chr11	62646848	62653302
ENSG00000069966.18	GNB5	protein_coding	1.76529	1.53552	0.0775146	5	5	224	chr15	52115105	52191369
ENSG00000107404.19	DVL1	protein_coding	1.76506	9.90607	0.0775533	4	5	62	chr1	1335276	1349350
ENSG00000105321.12	CCDC9	protein_coding	-1.76506	-2.30516	0.0775543	9	10	104	chr19	47255980	47271953
ENSG00000166197.16	NOLC1	protein_coding	1.76482	29.2222	0.0775932	3	3	56	chr10	102152176	102163871
ENSG00000030110.12	BAK1	protein_coding	1.76466	0.119484	0.0776208	22	22	497	chr6	33572547	33580293
ENSG00000131591.17	C1orf159	protein_coding	-1.76448	-1.48648	0.077652	9	10	238	chr1	1081818	1116361
ENSG00000142347.16	MYO1F	protein_coding	-1.76435	-3.74004	0.0776734	13	13	137	chr19	8520790	8577577
ENSG00000185052.11	SLC24A3	protein_coding	-1.76427	-2.72134	0.0776869	10	10	137	chr20	19212646	19722937
ENSG00000136280.15	CCM2	protein_coding	-1.76414	-2.3969	0.077709	17	17	155	chr7	44999475	45076469
ENSG00000228078.1	HLA-U	unprocessed_pseudogene	1.7641	0.089323	0.0777146	47	52	584	chr6	29934101	29934286
ENSG00000173421.16	CCDC36	protein_coding	1.76402	1.04211	0.0777283	3	3	279	chr3	49198428	49258104
ENSG00000139323.13	POC1B	protein_coding	1.76325	0.949547	0.0778577	13	14	152	chr12	89419718	89526024
ENSG00000128833.12	MYO5C	protein_coding	-1.76183	-2.01229	0.0780981	6	6	150	chr15	52192322	52295798
ENSG00000120254.15	MTHFD1L	protein_coding	-1.76132	-1.73196	0.0781838	15	15	188	chr6	150865549	151101887
ENSG00000224183.1	SDHDP6	processed_pseudogene	1.76098	0.0522932	0.0782421	16	17	399	chr1	25294164	25294643
ENSG00000174444.14	RPL4	protein_coding	-1.76075	-6.0442	0.0782809	4	4	41	chr15	66498015	66524532
ENSG00000142973.13	CYP4B1	protein_coding	1.76057	1.74419	0.0783107	15	15	181	chr1	46757838	46819413
ENSG00000247570.2	SDCBPP2	processed_pseudogene	1.76016	3.40497	0.078381	5	5	89	chr8	69942948	69944648
ENSG00000006327.13	TNFRSF12A	protein_coding	-1.75901	-1.84767	0.0785755	3	5	102	chr16	3018445	3022383
ENSG00000114742.13	WDR48	protein_coding	-1.75898	-126.989	0.078581	1	1	113	chr3	39051998	39096671
ENSG00000168653.10	NDUFS5	protein_coding	-1.75895	-0.160203	0.0785864	4	4	391	chr1	39026318	39034636
ENSG00000113643.8	RARS	protein_coding	-1.75852	-1.49581	0.0786587	11	11	134	chr5	168486445	168519299
ENSG00000168389.17	MFSD2A	protein_coding	1.75792	3.32309	0.078762	4	4	92	chr1	39955112	39969968
ENSG00000049239.12	H6PD	protein_coding	-1.75756	-0.249041	0.0788232	2	2	270	chr1	9234775	9271337
ENSG00000154978.12	VOPP1	protein_coding	-1.75708	-1.20554	0.078904	19	19	187	chr7	55436056	55572988
ENSG00000174485.15	DENND4A	protein_coding	1.75562	2.60749	0.0791539	2	2	110	chr15	65658046	65792293
ENSG00000120899.17	PTK2B	protein_coding	1.75521	4.72397	0.079223	1	1	137	chr8	27311482	27459391
ENSG00000221914.9	PPP2R2A	protein_coding	-1.75521	-8.47658	0.079223	1	1	57	chr8	26291491	26372680
ENSG00000198208.11	RPS6KL1	protein_coding	-1.75474	-0.213436	0.0793045	8	8	208	chr14	74903954	74923396
ENSG00000133398.3	MED10	protein_coding	-1.75367	-1.10544	0.0794878	14	14	175	chr5	6371881	6378594
ENSG00000180340.6	FZD2	protein_coding	-1.75342	-2.24792	0.0795296	8	8	105	chr17	44557459	44559570
ENSG00000143476.17	DTL	protein_coding	-1.75321	-15.0262	0.0795661	3	3	45	chr1	212035553	212107400
ENSG00000215244.2	RP11-563J2.2	lincRNA	1.7532	0.444894	0.0795683	29	29	179	chr10	6277687	6335982
ENSG00000108846.15	ABCC3	protein_coding	1.75315	0.428263	0.0795762	14	14	165	chr17	50634777	50692252
ENSG00000259293.1	LIPC-AS1	antisense	1.7531	2.84368	0.079585	5	5	132	chr15	58434890	58498735
ENSG00000119682.16	AREL1	protein_coding	1.75303	7.34992	0.0795967	7	7	118	chr14	74653437	74713115
ENSG00000160949.16	TONSL	protein_coding	-1.75276	-0.833639	0.0796439	16	17	186	chr8	144428808	144444444
ENSG00000165121.11	RP11-213G2.3	transcribed_unprocessed_pseudogene	-1.75261	-2.66392	0.0796696	8	8	134	chr9	85805359	85849542
ENSG00000160679.12	CHTOP	protein_coding	-1.75221	-2.59681	0.079737	1	1	123	chr1	153633982	153646306
ENSG00000203782.5	LOR	protein_coding	-1.75221	-1171.38	0.079737	1	1	70	chr1	153259700	153262122
ENSG00000211679.2	IGLC3	IG_C_gene	-1.752	-2.70457	0.079773	1	1	197	chr22	22906342	22906803
ENSG00000187801.14	ZFP69B	protein_coding	-1.75097	-0.970434	0.0799506	6	6	83	chr1	40450107	40463718
ENSG00000132670.20	PTPRA	protein_coding	1.74992	27.1954	0.080132	1	1	88	chr20	2864184	3039076
ENSG00000107831.12	FGF8	protein_coding	-1.74984	-1.10331	0.0801466	20	21	198	chr10	101770130	101780369
ENSG00000100147.13	CCDC134	protein_coding	-1.74962	-0.150701	0.0801838	11	12	182	chr22	41800679	41826299
ENSG00000143842.14	SOX13	protein_coding	-1.7492	-3.71293	0.080257	8	8	94	chr1	204073115	204127743
ENSG00000108861.8	DUSP3	protein_coding	-1.74903	-1.22076	0.0802853	3	3	80	chr17	43766121	43778988
ENSG00000203697.11	CAPN8	protein_coding	1.74861	0.237167	0.0803579	34	34	508	chr1	223538007	223665734
ENSG00000161091.12	MFSD12	protein_coding	1.74815	3.0143	0.0804375	13	16	139	chr19	3538261	3574290
ENSG00000175216.14	CKAP5	protein_coding	-1.74805	-7.52467	0.0804551	2	2	62	chr11	46743048	46846308
ENSG00000162650.16	ATXN7L2	protein_coding	-1.7479	-3.17419	0.0804814	7	7	88	chr1	109483479	109492734
ENSG00000117154.11	IGSF21	protein_coding	1.74704	1.74828	0.0806306	27	27	809	chr1	18107746	18378482
ENSG00000115756.12	HPCAL1	protein_coding	1.74686	0.996295	0.0806621	15	15	144	chr2	10302889	10427617
ENSG00000168938.5	PPIC	protein_coding	1.74679	0.523441	0.0806742	31	31	230	chr5	123023250	123036741
ENSG00000118557.15	PMFBP1	protein_coding	-1.74675	-0.754928	0.0806807	27	27	393	chr16	72112157	72176878
ENSG00000117601.13	SERPINC1	protein_coding	1.74632	0.229165	0.0807561	8	8	189	chr1	173903804	173917378
ENSG00000109881.16	CCDC34	protein_coding	1.74618	7.26739	0.08078	6	7	63	chr11	27330827	27363868
ENSG00000204311.12	DFNB59	protein_coding	-1.74585	-1.26389	0.0808372	10	10	104	chr2	178451436	178461390
ENSG00000164535.14	DAGLB	protein_coding	1.74546	0.304373	0.0809057	31	32	443	chr7	6409129	6484190
ENSG00000137210.13	TMEM14B	protein_coding	-1.74456	-0.922886	0.0810619	20	20	205	chr6	10747759	10852753
ENSG00000119402.16	FBXW2	protein_coding	1.74419	3.90116	0.0811253	6	6	64	chr9	120751978	120793412
ENSG00000152953.12	STK32B	protein_coding	1.74405	0.56885	0.0811509	60	63	995	chr4	5051442	5500998
ENSG00000171302.16	CANT1	protein_coding	1.74384	3.05321	0.0811875	16	18	203	chr17	78991717	79009867
ENSG00000104814.12	MAP4K1	protein_coding	1.74342	5.96523	0.0812599	8	8	102	chr19	38587641	38618882
ENSG00000173915.14	USMG5	protein_coding	-1.74333	-31.0027	0.0812755	2	2	91	chr10	103389041	103396466
ENSG00000116752.5	BCAS2	protein_coding	-1.74317	-0.77758	0.0813045	9	9	106	chr1	114567557	114581639
ENSG00000117862.11	TXNDC12	protein_coding	-1.74303	-0.968494	0.0813288	5	5	96	chr1	52020131	52056171
ENSG00000134996.11	OSTF1	protein_coding	1.74216	2.19793	0.08148	13	14	154	chr9	75088543	75147265
ENSG00000183813.6	CCR4	protein_coding	1.74206	1.85011	0.0814982	23	23	375	chr3	32951574	32956349
ENSG00000242852.6	ZNF709	protein_coding	1.74172	0.321281	0.0815581	10	10	154	chr19	12461184	12513854
ENSG00000087502.17	ERGIC2	protein_coding	1.74143	3.97456	0.0816081	13	13	139	chr12	29337352	29381189
ENSG00000106327.12	TFR2	protein_coding	1.74119	1.9298	0.0816499	8	8	111	chr7	100620416	100642721
ENSG00000166272.16	WBP1L	protein_coding	1.74112	1.34152	0.0816628	12	13	131	chr10	102743970	102816267
ENSG00000163082.9	SGPP2	protein_coding	-1.74092	-2.41556	0.0816984	10	10	130	chr2	222424517	222560948
ENSG00000063244.12	U2AF2	protein_coding	1.74034	4.69068	0.0817995	12	12	90	chr19	55654146	55674715
ENSG00000115009.11	CCL20	protein_coding	1.73935	0.427774	0.0819733	19	19	585	chr2	227813842	227817564
ENSG00000084093.16	REST	protein_coding	-1.73929	-5.69259	0.0819841	3	3	98	chr4	56907876	56966678
ENSG00000075399.13	VPS9D1	protein_coding	-1.73922	-0.706618	0.0819952	22	22	300	chr16	89707134	89720986
ENSG00000172748.13	ZNF596	protein_coding	-1.73832	-0.647554	0.0821544	19	19	126	chr8	232137	264703
ENSG00000147592.8	LACTB2	protein_coding	-1.73804	-0.199908	0.0822033	19	19	195	chr8	70635318	70669174
ENSG00000143337.18	TOR1AIP1	protein_coding	-1.73745	-7.37519	0.0823083	5	5	60	chr1	179882042	179925000
ENSG00000198832.10	SELENOM	protein_coding	-1.7374	-0.382152	0.0823165	2	2	169	chr22	31104772	31120069
ENSG00000137266.14	SLC22A23	protein_coding	-1.73718	-1.15211	0.0823553	25	27	165	chr6	3268962	3457022
ENSG00000172731.13	LRRC20	protein_coding	1.73685	1.24249	0.0824135	16	17	186	chr10	70298970	70382650
ENSG00000187010.19	RHD	protein_coding	1.73653	0.0444647	0.0824706	9	9	414	chr1	25272393	25330445
ENSG00000214736.7	TOMM6	protein_coding	1.73635	0.636535	0.0825019	7	7	102	chr6	41787662	41789898
ENSG00000105676.13	ARMC6	protein_coding	1.73602	2.10263	0.0825601	12	14	125	chr19	19033575	19060311
ENSG00000005007.12	UPF1	protein_coding	-1.73574	-6.19859	0.0826106	3	3	48	chr19	18831938	18868236
ENSG00000163138.18	PACRGL	protein_coding	1.73529	0.267374	0.08269	23	23	283	chr4	20696282	20752907
ENSG00000081870.11	HSPB11	protein_coding	-1.73508	-4.08543	0.0827264	2	2	92	chr1	53916574	53945929
ENSG00000178445.9	GLDC	protein_coding	1.73452	0.250126	0.0828263	22	22	638	chr9	6532464	6645783
ENSG00000079387.13	SENP1	protein_coding	-1.73429	-3.78826	0.0828675	6	6	92	chr12	48042898	48106308
ENSG00000137074.18	APTX	protein_coding	1.73413	0.29358	0.0828954	9	9	289	chr9	32972606	33025168
ENSG00000130311.10	DDA1	protein_coding	-1.73378	-5.32407	0.0829575	12	12	124	chr19	17309518	17323301
ENSG00000189241.6	TSPYL1	protein_coding	-1.73267	-0.370234	0.0831546	19	19	249	chr6	116276578	116279903
ENSG00000159314.11	ARHGAP27	protein_coding	1.73254	3.17156	0.083177	8	9	181	chr17	45393902	45434421
ENSG00000104332.11	SFRP1	protein_coding	-1.73194	-37.8505	0.083284	1	1	195	chr8	41261958	41309497
ENSG00000175513.9	TSGA10IP	protein_coding	1.7316	0.78124	0.0833442	13	13	234	chr11	65945445	65959963
ENSG00000141985.9	SH3GL1	protein_coding	1.73156	1.6202	0.0833519	12	13	175	chr19	4360370	4400547
ENSG00000096070.19	BRPF3	protein_coding	-1.73139	-3.37923	0.0833823	11	11	98	chr6	36196744	36232790
ENSG00000211724.3	TRBV6-6	TR_V_gene	-1.73129	-0.267317	0.0833993	27	30	71	chr7	142469537	142470013
ENSG00000159167.11	STC1	protein_coding	-1.73067	-0.691021	0.0835106	7	7	66	chr8	23841915	23854807
ENSG00000175984.14	DENND2C	protein_coding	-1.73047	-0.471016	0.0835466	18	18	122	chr1	114582848	114670422
ENSG00000072736.18	NFATC3	protein_coding	-1.72993	-0.246788	0.0836428	11	11	230	chr16	68084751	68229259
ENSG00000231607.10	DLEU2	antisense	-1.72985	-2.52117	0.0836574	13	13	103	chr13	49982552	50125720
ENSG00000197978.9	GOLGA6L9	protein_coding	-1.72938	-0.7694	0.083741	5	5	323	chr15	82430020	82436762
ENSG00000145293.15	ENOPH1	protein_coding	1.72887	5.21259	0.0838331	5	6	66	chr4	82430562	82461091
ENSG00000177096.8	FAM109B	protein_coding	-1.72834	-0.791896	0.0839278	7	8	182	chr22	42074251	42079441
ENSG00000147471.11	PROSC	protein_coding	-1.72829	-2.80139	0.0839356	9	9	129	chr8	37762593	37779767
ENSG00000198846.5	TOX	protein_coding	-1.72798	-1.20453	0.0839912	9	9	122	chr8	58805418	59119208
ENSG00000151552.11	QDPR	protein_coding	1.72781	0.577411	0.0840221	25	26	270	chr4	17460261	17512234
ENSG00000168439.16	STIP1	protein_coding	1.72745	8.20247	0.0840872	2	2	45	chr11	64185272	64204543
ENSG00000197045.12	GMFB	protein_coding	1.72731	3.99964	0.0841118	3	3	96	chr14	54474484	54489196
ENSG00000065978.18	YBX1	protein_coding	1.72717	2.2296	0.0841379	7	7	101	chr1	42682427	42702349
ENSG00000109680.10	TBC1D19	protein_coding	1.72648	1.38976	0.0842615	14	14	131	chr4	26576437	26755351
ENSG00000235194.8	PPP1R3E	protein_coding	-1.72609	-396.618	0.084332	1	1	68	chr14	23295915	23301583
ENSG00000120942.13	UBIAD1	protein_coding	1.72583	4.72057	0.0843778	10	11	118	chr1	11273206	11296049
ENSG00000211725.3	TRBV5-5	TR_V_gene	-1.72545	-0.348663	0.0844463	15	16	35	chr7	142482548	142483019
ENSG00000126062.3	TMEM115	protein_coding	1.72543	2.7876	0.0844495	3	3	59	chr3	50354749	50359610
ENSG00000152443.12	ZNF776	protein_coding	1.72539	16.5468	0.0844574	7	7	63	chr19	57746796	57758159
ENSG00000260465.1	RP11-63M22.2	antisense	-1.72521	-0.809699	0.0844895	5	5	107	chr16	66720897	66731785
ENSG00000135074.15	ADAM19	protein_coding	-1.72459	-0.542465	0.0846014	22	22	248	chr5	157395534	157575775
ENSG00000106066.14	CPVL	protein_coding	-1.72444	-0.141919	0.0846288	14	16	262	chr7	28995231	29195451
ENSG00000196850.5	PPTC7	protein_coding	-1.7244	-3.68783	0.0846358	5	6	78	chr12	110533245	110583320
ENSG00000228594.3	FNDC10	protein_coding	1.72419	1.07302	0.0846737	9	10	137	chr1	1598012	1600096
ENSG00000129048.6	ACKR4	protein_coding	-1.72392	-0.981489	0.0847231	8	9	75	chr3	132597237	132618967
ENSG00000178951.8	ZBTB7A	protein_coding	1.72353	2.80904	0.0847922	12	13	97	chr19	4044364	4066945
ENSG00000166446.14	CDYL2	protein_coding	1.72327	0.805378	0.08484	16	16	155	chr16	80597906	80804329
ENSG00000249709.7	ZNF564	protein_coding	1.72306	1.10463	0.0848771	6	6	111	chr19	12525370	12551542
ENSG00000134986.13	NREP	protein_coding	1.72298	1.86378	0.0848925	8	8	125	chr5	111662621	111997464
ENSG00000136315.4	RP11-84C10.2	lincRNA	-1.72297	-3.21536	0.0848935	6	7	232	chr14	20919361	20920299
ENSG00000092295.11	TGM1	protein_coding	1.72281	0.612338	0.0849222	9	9	225	chr14	24249114	24264432
ENSG00000120526.10	NUDCD1	protein_coding	-1.72214	-1.77289	0.085044	9	9	104	chr8	109240919	109334385
ENSG00000173039.18	RELA	protein_coding	-1.72203	-8.63542	0.0850647	4	4	65	chr11	65653596	65663094
ENSG00000135900.3	MRPL44	protein_coding	-1.72187	-1.84359	0.0850922	12	12	108	chr2	223957404	223967714
ENSG00000175643.8	RMI2	protein_coding	-1.7218	-0.594037	0.0851062	5	5	403	chr16	11249649	11351762
ENSG00000177380.13	PPFIA3	protein_coding	-1.72119	-4.19898	0.0852161	6	6	93	chr19	49119389	49151026
ENSG00000168763.15	CNNM3	protein_coding	-1.72106	-6.62427	0.0852392	5	5	119	chr2	96816245	96833911
ENSG00000211957.2	IGHV3-35	IG_V_gene	1.721	0.190033	0.0852509	24	33	96	chr14	106389392	106389858
ENSG00000121104.7	FAM117A	protein_coding	1.72	6.2497	0.0854319	7	7	62	chr17	49710332	49789180
ENSG00000170099.5	SERPINA6	protein_coding	-1.7185	-3.14645	0.0857059	5	5	194	chr14	94304248	94323394
ENSG00000142751.14	GPN2	protein_coding	1.71847	0.987494	0.0857108	6	6	76	chr1	26876133	26890297
ENSG00000163818.16	LZTFL1	protein_coding	1.71833	0.601558	0.085737	12	12	93	chr3	45823316	45916042
ENSG00000008441.16	NFIX	protein_coding	-1.71745	-4.31094	0.0858966	2	2	54	chr19	12995608	13098796
ENSG00000082438.15	COBLL1	protein_coding	1.71689	2.39988	0.0859988	8	8	415	chr2	164653624	164843679
ENSG00000177192.13	PUS1	protein_coding	-1.71619	-2.64625	0.0861271	12	13	92	chr12	131929200	131945896
ENSG00000157350.12	ST3GAL2	protein_coding	-1.71573	-2.36935	0.0862118	9	9	78	chr16	70375978	70439237
ENSG00000196312.12	MFSD14C	protein_coding	-1.71572	-0.469447	0.0862128	27	28	251	chr9	96897917	97013600
ENSG00000155957.17	TMBIM4	protein_coding	-1.71556	-0.334454	0.0862426	6	6	254	chr12	66135846	66170072
ENSG00000099994.10	SUSD2	protein_coding	1.71534	0.198457	0.0862822	15	16	311	chr22	24181259	24189110
ENSG00000188878.19	FBF1	protein_coding	1.71506	0.740514	0.0863347	22	22	329	chr17	75909574	75941056
ENSG00000224950.2	RP5-1086K13.1	lincRNA	1.71484	0.337049	0.086374	1	1	112	chr1	116493016	116499212
ENSG00000136104.19	RNASEH2B	protein_coding	1.71476	0.182517	0.0863899	6	6	259	chr13	50909678	50973745
ENSG00000111252.10	SH2B3	protein_coding	1.7145	1.64168	0.0864368	5	5	61	chr12	111405948	111451623
ENSG00000196628.15	TCF4	protein_coding	1.71421	4.55898	0.0864905	3	3	89	chr18	55222331	55664787
ENSG00000087085.13	ACHE	protein_coding	1.71335	1.24829	0.0866476	15	16	202	chr7	100889994	100896974
ENSG00000174276.6	ZNHIT2	protein_coding	1.7125	2.95919	0.086805	1	1	23	chr11	65116403	65117708
ENSG00000149313.10	AASDHPPT	protein_coding	-1.71187	-3.37553	0.0869202	7	7	132	chr11	106075501	106098710
ENSG00000049246.14	PER3	protein_coding	1.71156	11.9674	0.086978	1	1	69	chr1	7784320	7845177
ENSG00000158156.7	XKR8	protein_coding	-1.7112	-4.83132	0.0870434	11	11	72	chr1	27959462	27968096
ENSG00000177990.11	DPY19L2	protein_coding	-1.71083	-0.193762	0.0871119	29	30	352	chr12	63558913	63668849
ENSG00000156958.14	GALK2	protein_coding	-1.71081	-0.178307	0.0871154	8	8	129	chr15	49155656	49367869
ENSG00000155506.16	LARP1	protein_coding	1.71081	0.392044	0.0871158	2	2	142	chr5	154712902	154817607
ENSG00000263393.1	RP11-53I6.4	antisense	1.70976	1.85315	0.0873104	14	14	488	chr18	32122400	32124478
ENSG00000117408.10	IPO13	protein_coding	-1.70919	-2.99845	0.087415	4	4	76	chr1	43946939	43968022
ENSG00000168884.14	TNIP2	protein_coding	-1.70851	-2.61174	0.0875411	2	2	123	chr4	2741648	2756376
ENSG00000100387.8	RBX1	protein_coding	1.70785	8.28215	0.0876647	6	6	76	chr22	40951359	40973309
ENSG00000051596.9	THOC3	protein_coding	1.70783	0.630255	0.0876681	31	35	414	chr5	175917873	176034680
ENSG00000170634.12	ACYP2	protein_coding	1.70779	0.197147	0.0876749	4	4	267	chr2	53970838	54305300
ENSG00000196421.8	LINC00176	protein_coding	-1.70763	-3.24786	0.0877045	3	3	80	chr20	64036175	64039962
ENSG00000085552.16	IGSF9	protein_coding	-1.7076	-0.655518	0.0877106	22	22	567	chr1	159927039	159945604
ENSG00000129167.9	TPH1	protein_coding	-1.70758	-0.472939	0.0877144	26	26	199	chr11	18017564	18042426
ENSG00000116852.14	KIF21B	protein_coding	-1.70693	-1.08158	0.0878349	8	8	90	chr1	200969390	201023700
ENSG00000165626.16	BEND7	protein_coding	1.70628	0.17001	0.0879559	33	33	695	chr10	13438484	13528974
ENSG00000037042.8	TUBG2	protein_coding	-1.70617	-0.436777	0.087976	6	6	196	chr17	42659305	42667006
ENSG00000172728.15	FUT10	protein_coding	-1.7061	-0.0679471	0.0879893	3	3	314	chr8	33370824	33473422
ENSG00000253330.1	RP11-697N18.3	processed_pseudogene	-1.70586	-0.500348	0.0880347	9	9	149	chr8	47511034	47512141
ENSG00000101161.7	PRPF6	protein_coding	-1.70565	-109.275	0.088074	1	1	162	chr20	63981135	64033100
ENSG00000125900.12	SIRPD	protein_coding	-1.70543	-1.71969	0.0881151	20	22	319	chr20	1534251	1558843
ENSG00000113073.14	SLC4A9	protein_coding	1.70481	1.01166	0.0882293	2	2	361	chr5	140360202	140375143
ENSG00000172023.7	REG1B	protein_coding	-1.70459	-7.63189	0.08827	4	4	100	chr2	79085030	79087993
ENSG00000229715.4	EEF1DP3	transcribed_unprocessed_pseudogene	-1.70444	-0.581818	0.0882983	31	32	502	chr13	31846841	31953472
ENSG00000163704.11	PRRT3	protein_coding	-1.70394	-3.01379	0.088393	15	15	112	chr3	9945542	9952394
ENSG00000156970.12	BUB1B	protein_coding	-1.70358	-969.153	0.088459	1	1	72	chr15	40161023	40221136
ENSG00000114779.19	ABHD14B	protein_coding	-1.70349	-1.93996	0.0884766	8	8	158	chr3	51968510	51983409
ENSG00000113504.20	SLC12A7	protein_coding	-1.70298	-0.53653	0.0885711	22	23	213	chr5	1050376	1112035
ENSG00000196189.12	SEMA4A	protein_coding	-1.70297	-4.93887	0.0885734	18	19	258	chr1	156147366	156177752
ENSG00000104490.17	NCALD	protein_coding	-1.7028	-35.6175	0.088605	1	1	126	chr8	101686543	102124907
ENSG00000253328.2	SUMO2P19	unprocessed_pseudogene	-1.7028	-69.2521	0.088605	1	1	230	chr8	102242040	102242619
ENSG00000246548.3	RP11-7F17.5	lincRNA	1.70127	0.723489	0.088892	1	1	150	chr14	77041064	77069503
ENSG00000128052.8	KDR	protein_coding	-1.70047	-1.1804	0.0890424	20	20	607	chr4	55078477	55125589
ENSG00000145020.15	AMT	protein_coding	1.70015	0.149686	0.0891032	12	12	248	chr3	49416775	49422753
ENSG00000179639.10	FCER1A	protein_coding	-1.69998	-0.481683	0.0891355	6	6	576	chr1	159289714	159308224
ENSG00000198353.7	HOXC4	protein_coding	1.69926	14.267	0.0892698	2	2	76	chr12	54037854	54056030
ENSG00000120278.15	PLEKHG1	protein_coding	1.69867	304.209	0.089382	1	1	148	chr6	150599883	150843665
ENSG00000154316.16	TDH	transcribed_unitary_pseudogene	1.69851	0.40252	0.089411	9	9	631	chr8	11339637	11368452
ENSG00000130956.13	HABP4	protein_coding	1.69837	0.593441	0.0894378	10	10	166	chr9	96450201	96491336
ENSG00000119900.7	OGFRL1	protein_coding	-1.69835	-1.27512	0.0894411	2	2	170	chr6	71288803	71308950
ENSG00000131165.14	CHMP1A	protein_coding	-1.69831	-1.31883	0.0894487	12	12	333	chr16	89644431	89657845
ENSG00000163961.4	RNF168	protein_coding	-1.69813	-2.05987	0.089484	1	1	203	chr3	196468783	196503768
ENSG00000116016.13	EPAS1	protein_coding	-1.69805	-84.7577	0.0894979	2	2	83	chr2	46293667	46386703
ENSG00000089916.17	GPATCH2L	protein_coding	1.69737	1.69795	0.0896261	18	19	220	chr14	76151916	76254342
ENSG00000113391.18	FAM172A	protein_coding	1.69736	2.85429	0.0896282	6	6	93	chr5	93618069	94111699
ENSG00000150907.7	FOXO1	protein_coding	-1.69735	-9.39904	0.089631	1	1	65	chr13	40469953	40666597
ENSG00000119801.12	YPEL5	protein_coding	-1.69718	-13.5308	0.0896633	3	3	64	chr2	30146941	30160533
ENSG00000243414.5	TICAM2	protein_coding	-1.69671	-78.0806	0.089751	1	1	199	chr5	115578650	115602479
ENSG00000242473.1	KIR2DP1	unprocessed_pseudogene	1.69628	0.192483	0.0898329	22	32	62	chr19	54755023	54767371
ENSG00000143575.14	HAX1	protein_coding	1.69584	2.27462	0.0899165	16	16	151	chr1	154272511	154275875
ENSG00000245008.3	RP11-744N12.3	antisense	-1.69574	-2.96789	0.0899342	7	7	213	chr11	128629653	128686922
ENSG00000161970.12	RPL26	protein_coding	1.69564	3.16707	0.0899538	7	7	67	chr17	8377520	8383213
ENSG00000260267.1	RP11-452L6.5	antisense	-1.6948	-7.02534	0.090114	4	4	80	chr16	31456711	31459736
ENSG00000023445.13	BIRC3	protein_coding	1.69418	0.894298	0.0902318	5	5	71	chr11	102317450	102339403
ENSG00000143387.12	CTSK	protein_coding	1.69384	0.200522	0.0902957	3	3	142	chr1	150796208	150808323
ENSG00000116918.13	TSNAX	protein_coding	1.6938	11.8498	0.090304	3	3	47	chr1	231528653	231566524
ENSG00000132823.10	OSER1	protein_coding	-1.69296	-0.178844	0.0904639	19	19	190	chr20	44196496	44210791
ENSG00000136982.5	DSCC1	protein_coding	1.69295	0.401247	0.0904659	18	18	357	chr8	119833976	119856010
ENSG00000197872.11	FAM49A	protein_coding	-1.69275	-4.39093	0.090504	1	1	127	chr2	16549459	16666331
ENSG00000114902.13	SPCS1	protein_coding	1.69272	1.50964	0.0905086	4	4	91	chr3	52704955	52711146
ENSG00000136404.15	TM6SF1	protein_coding	-1.69212	-2.94811	0.0906229	11	11	87	chr15	83107407	83144854
ENSG00000138614.14	INTS14	protein_coding	-1.69099	-3.68	0.0908394	3	3	119	chr15	65578753	65611289
ENSG00000118849.9	RARRES1	protein_coding	-1.69074	-0.541873	0.0908869	15	15	203	chr3	158696892	158732696
ENSG00000130176.7	CNN1	protein_coding	1.69066	2.22879	0.090902	6	6	52	chr19	11538717	11550323
ENSG00000100731.15	PCNX1	protein_coding	1.69063	0.353739	0.0909082	3	3	309	chr14	70907405	71115382
ENSG00000117215.14	PLA2G2D	protein_coding	1.69042	1.11208	0.090947	11	11	282	chr1	20111939	20119566
ENSG00000100483.13	VCPKMT	protein_coding	1.69028	0.511526	0.090974	16	17	235	chr14	50108633	50116600
ENSG00000104980.7	TIMM44	protein_coding	-1.6902	-0.361476	0.0909897	3	3	268	chr19	7926721	7943920
ENSG00000149532.15	CPSF7	protein_coding	-1.69007	-2.65036	0.0910146	20	20	242	chr11	61402641	61430031
ENSG00000267274.1	CTD-2006C1.12	sense_overlapping	1.68974	1.79624	0.0910783	29	31	445	chr19	11939959	11953381
ENSG00000123427.16	METTL21B	protein_coding	1.68956	0.0873835	0.0911115	26	26	344	chr12	57771492	57782541
[truncated: 12,027 more rows]

## Sheet: S.Data5
SupplementaryData 5: Gene set pathway enrichment analysis of the transcriptome-wide analyses (from Supplementary Table XX) using the Elsevier Pathway Collection through EnrichR
Elsevier Pathway	Genes	P-value	Odds Ratio	Combined Score	Overlap
Immunoglobulin Class-Switch Recombination via Classical non-Homologous End-Joining	MDC1;ATM	0.000888371	43.29	304.161	2020-02-07
AMPK Related Catabolism Deceleration in Glucose Insufficiency	SREBF1;ATG13	0.00228676	27.5482	167.51	2020-02-11
Proteins Involved in T-Cell Acute Lymphoblastic Leukemia	TAL1;ATM;IKZF1	0.00232266	11.3636	68.9209	1940-03-01
Hematopoietic Cell Lineage: B-cell (mouse)	FLT3;TCF12;IKZF1	0.00414844	9.27644	50.8815	1949-03-01
T-Cell Genetic Rearrangements in Acute Lymphoblastic Leukemia	TAL1;TCF12	0.00686851	15.949	79.4387	2020-02-19
NURD in Chromatin Remodeling	SIN3A;IKZF1	0.00686851	15.949	79.4387	2020-02-19
Double Strand DNA Homologous Repair	MDC1;ATM	0.0075989	15.1515	73.9356	2020-02-20
EGFR Transactivation in Cancer and Non-Cancer Cells	LPAR2;PIK3CB;F2	0.00836338	7.21501	34.5158	1963-03-01
Myeloblast -> Neutrophil Surface Expression Markers	CD164;FLT3;NCAM1	0.008733	7.10227	33.6694	1964-03-01
Proteins Involved in Myocarditis	NCAM1;PDCD1LG2;F2;IL12RB1;NFKB1	0.0121442	3.65979	16.143	5/207
IL23A and IL17A Provoke Cancer-Associated Inflammation	IL12RB1;NFKB1	0.0126673	11.655	50.9176	2020-02-26
Microglia and Motor Neuron Interaction Dysregulation	DOK1;CD200	0.0126673	11.655	50.9176	2020-02-26
mTOR Signaling	SREBF1;DAP;ATG13	0.0164963	5.61167	23.0338	1981-03-01
Persistent Double Strand DNA Homologous Repair in Cancer	MDC1;ATM	0.0166665	10.101	41.3571	1930-02-01
Persisted DNA Repair Triggers Genomic Instability	MDC1;ATM	0.0199717	9.18274	35.9361	1933-02-01
SCF/BTRC Complex	ATG13;NFKB1	0.0211294	8.91266	34.3769	1934-02-01
Proteins Involved in Spontaneous Abortion	NCAM1;F2;CD200	0.023706	4.88759	18.2895	1993-03-01
Hematopoietic Cell Lineage: B-cell	FLT3;IKZF1	0.0260295	7.97448	29.0951	1938-02-01
Proteins Involved in Osteopetrosis	GAB2;NFKB1	0.0286355	7.57576	26.9175	1940-02-01
AMPK Signaling	SREBF1;ATG13	0.029976	7.39098	25.9228	1941-02-01
Proteins Involved in non-Alcoholic Fatty Liver Disease	SREBF1;ABCC2;F2;NFKB1	0.0349395	3.25839	10.9291	4/186
Ras-GAP Regulation Signaling	DOK1;CD200	0.03704	6.58762	21.7112	1946-02-01
Proteins Involved in Endometrioid Ovarian Carcinoma	LPAR2;ATM	0.0400271	6.31313	20.3169	1948-02-01
CDKN2B-AS1 in Epigenetic Regulation of Glaucoma	ATM	0.0453017	21.645	66.9786	2020-01-07
Genes with Mutations Associated with Pregnancy Related Coagulation Disorders	F2	0.0453017	21.645	66.9786	2020-01-07
Insulin Signaling	SREBF1;ATG13	0.0495055	5.61167	16.8668	1954-02-01
Th1-Cell Function in Systemic Lupus Erythematosus	IKZF1;IL12RB1	0.0511571	5.50964	16.3794	1955-02-01
NFKB Signaling Activation by Blocking of Tumor Suppressors	NFKBIZ;NFKB1	0.0511571	5.50964	16.3794	1955-02-01
DC-SIGN (CD209) Signaling	NFKB1	0.0516049	18.9394	56.139	2020-01-08
Selencompound Biosynthesis	PSTK	0.0516049	18.9394	56.139	2020-01-08
POMC Activation in Keratinocytes	ATM	0.0516049	18.9394	56.139	2020-01-08
Proteins Involved in High-Grade Serous Ovarian Carcinoma	LPAR2;ATM	0.0545186	5.31632	15.4663	1957-02-01
IL12R -> STAT Signaling	IL12RB1	0.0578668	16.835	47.9733	2020-01-09
CAV1 Dependent Senescence of Lung Fibroblasts	ATM	0.0578668	16.835	47.9733	2020-01-09
Estrogen Deficiency in Female Obesity	SREBF1	0.0578668	16.835	47.9733	2020-01-09
IL12R -> NF-kB/NFATC Signaling	IL12RB1	0.0640876	15.1515	41.6288	2020-01-10
HMGB1 and IL1B in Neuronal Hyperexcitation	SMPD2	0.0640876	15.1515	41.6288	2020-01-10
Neuroinflammation in Amyotrophic Lateral Sclerosis	CD200	0.0640876	15.1515	41.6288	2020-01-10
IDO1 in Cancer Immune Escape	DOK1;CD200	0.0650486	4.81	13.1439	1963-02-01
beta-Casomorphins/Opioid Receptors Affect Brain Function (Hypothesis)	NFKB1	0.0702677	13.7741	36.5763	2020-01-11
Immunoglobulin Class-Switch Recombination via Alternative End-Joining	MDC1	0.0702677	13.7741	36.5763	2020-01-11
Endosomal Trafficking Dysregulation in Amyotrophic Lateral Sclerosis	FIG4	0.0702677	13.7741	36.5763	2020-01-11
RHO Signaling (Dark)	SLC24A1	0.0702677	13.7741	36.5763	2020-01-11
Tricarboxylic Acid Cycle Enzymes Involvement in Alzheimer Disease	ACAT1	0.0702677	13.7741	36.5763	2020-01-11
Genes with Mutations in Cancer Immune Escape	PDCD1LG2	0.0702677	13.7741	36.5763	2020-01-11
IL23R -> STAT3/NF-kB Signaling	IL12RB1	0.0764073	12.6263	32.4707	2020-01-12
Fatty Acids Cause Oxidative Stress and Mitochondria Decline in Aging	SREBF1	0.0764073	12.6263	32.4707	2020-01-12
Mast-Cell Activation without Degranulation through KIT/F2R Signaling	F2	0.0764073	12.6263	32.4707	2020-01-12
Lipodystrophy, Familial Partial	SREBF1	0.0764073	12.6263	32.4707	2020-01-12
Telomeric Proteins/NFKB Positive Feedback Interplay in Cancer	NFKB1	0.0764073	12.6263	32.4707	2020-01-12
Estrogens Procoagulant Effect	F2	0.0825067	11.655	29.0778	2020-01-13
Proteins Involved in Werner Syndrome (Adult Progeria)	ATM	0.0825067	11.655	29.0778	2020-01-13
RHO Signaling (Light)	SLC24A1	0.0825067	11.655	29.0778	2020-01-13
LINE1 Retrotransposition in Neuron Development (Hypothesis)	ATM	0.0825067	11.655	29.0778	2020-01-13
B-Cell Acute Lymphoblastic Leukemia	IKZF1;GAB2	0.0859077	4.095	10.0511	1974-02-01
NFKB Canonical Signaling Activation in Cancer	NFKBIZ;NFKB1	0.0878933	4.0404	9.82477	1975-02-01
Proteins Involved in Urolithiasis	F2	0.0885661	10.8225	26.2338	2020-01-14
Hodgkin and Reed-Sternberg Cells in Hodgkin Lymphoma	PDCD1LG2	0.0885661	10.8225	26.2338	2020-01-14
SCF/FBXO7 Complex	NFKB1	0.0885661	10.8225	26.2338	2020-01-14
PAX8 Targets in Thyroid Dysgenesis (Hypothesis)	NCAM1	0.0885661	10.8225	26.2338	2020-01-14
PNPLA3 in non-Alcoholic Fatty Liver Disease	SREBF1	0.0885661	10.8225	26.2338	2020-01-14
Berardinelli-Seip Syndrome Progression (Hypothesis)	SREBF1	0.0945857	10.101	23.8207	2020-01-15
NCAM1 -> CREB/ELK/SRF/MYC Signaling	NCAM1	0.0945857	10.101	23.8207	2020-01-15
Proteins Involved in Phenylketonuria	EGR2	0.0945857	10.101	23.8207	2020-01-15
Familial Partial Lipodystrophy Type 2 Progression (Hypothesis)	SREBF1	0.0945857	10.101	23.8207	2020-01-15
RHO Signaling (Light Signal Termination and Photoreceptor Recovery)	SLC24A1	0.0945857	10.101	23.8207	2020-01-15
Basophil Activation	GAB2;F2	0.0959702	3.83583	8.99009	1979-02-01
Proteins Involved in Pulmonary Hypertension	ATF7IP;ID1;F2	0.0960144	2.75482	6.45525	3/165
Disorders of Phenylalanine and Tyrosine Metabolism	PNMT	0.100566	9.4697	21.7513	2020-01-16
Proteins Involved in Vascular Dementia	F2	0.100566	9.4697	21.7513	2020-01-16
Fatty Acid Synthase (FASN) Signaling	SREBF1	0.100566	9.4697	21.7513	2020-01-16
Vitamin K Metabolism	F2	0.100566	9.4697	21.7513	2020-01-16
Spindle Assembly	MAD1L1	0.100566	9.4697	21.7513	2020-01-16
Androgen Induced Sebocyte Hyperfunction	SREBF1	0.100566	9.4697	21.7513	2020-01-16
Familial Partial Lipodystrophy Type 4 Progression (Hypothesis)	SREBF1	0.106507	8.91266	19.9603	2020-01-17
Hutchinson-Gilford Progeria Syndrome	SREBF1	0.106507	8.91266	19.9603	2020-01-17
G2/M Damage Checkpoint	ATM	0.106507	8.91266	19.9603	2020-01-17
Histone Phosphorylation	ATM	0.106507	8.91266	19.9603	2020-01-17
Proteins Involved in Antiphospholipid Syndrome	F2	0.112409	8.41751	18.3974	2020-01-18
Epigenetic Alterations Triggers Genomic Instability	SIN3A	0.112409	8.41751	18.3974	2020-01-18
Toll-like Receptors in Pyelonephritis	NFKB1	0.112409	8.41751	18.3974	2020-01-18
Alternative Lengthening of Telomeres in Cancer	ATM	0.112409	8.41751	18.3974	2020-01-18
Oxidized LDL/OLR1 Activates Cell Proliferation in Cancer	NFKB1	0.112409	8.41751	18.3974	2020-01-18
Single-Strand Nucleotide Excision	RFC1	0.112409	8.41751	18.3974	2020-01-18
Monoblast -> Promonocyte Surface Expression Markers	NCAM1	0.112409	8.41751	18.3974	2020-01-18
Myeloid Progenitor Cell -> GEMM - CFU Surface Expression Markers	FLT3	0.112409	8.41751	18.3974	2020-01-18
Proteins Involved in Glioblastoma	ATM;NCAM1;ACAT1	0.113714	2.55363	5.55175	3/178
Proteins with Altered Expression in Cancer-Associated Enabling of Replicative Immortality	NFKB1	0.118272	7.97448	17.0236	2020-01-19
Diffuse Large-B-Cell Lymphoma	NFKBIZ;PDCD1LG2	0.121354	3.33	7.02312	1991-02-01
Proteins Involved in Astrocytoma	ATM;F2	0.123538	3.29381	6.88802	1992-02-01
Proteins Involved in Vasospasm	F2	0.124097	7.57576	15.8083	2020-01-20
SIRT6 Signaling in Aging	NFKB1	0.124097	7.57576	15.8083	2020-01-20
Apoptosis Block by Inhibitor of Apoptosis Proteins (IAPs) in Cancer	NFKB1	0.124097	7.57576	15.8083	2020-01-20
Vascular Smooth Muscle Cell/Pericyte Differentiation and Proliferation	ID1	0.124097	7.57576	15.8083	2020-01-20
Li-Fraumeni Syndrome	ATM	0.124097	7.57576	15.8083	2020-01-20
Golgi Transport	SEC24D	0.124097	7.57576	15.8083	2020-01-20
Histone Acetylation	SIN3A	0.124097	7.57576	15.8083	2020-01-20
Nuclear Lamina Cleavage	SREBF1	0.124097	7.57576	15.8083	2020-01-20
IGF1R -> ELK/SRF/HIF1A/MYC/SREBF Signaling	SREBF1	0.129884	7.21501	14.7266	2020-01-21
InsulinR -> ELK/SRF/SREBF Signaling	SREBF1	0.129884	7.21501	14.7266	2020-01-21
Proteins Involved in Mantle Cell Lymphoma	ATM	0.129884	7.21501	14.7266	2020-01-21
MTHFR Activity Regulation	SREBF1	0.129884	7.21501	14.7266	2020-01-21
Double Strand DNA non-Homologous Repair	ATM	0.129884	7.21501	14.7266	2020-01-21
MEN1 Mutation in Hyperparathyroidism	NFKB1	0.129884	7.21501	14.7266	2020-01-21
Nuclear Envelope in Cell Division	SREBF1	0.129884	7.21501	14.7266	2020-01-21
Follicular Lymphoma	ATM;IL12RB1	0.134601	3.12402	6.26505	1997-02-01
EGFR Nuclear Signaling in Colorectal Cancer	MDC1	0.135633	6.88705	13.759	2020-01-22
Proteins with Altered Expression in Aging	ATM	0.135633	6.88705	13.759	2020-01-22
TP53 Signaling in Pancreatic Neoplasms	ATM	0.135633	6.88705	13.759	2020-01-22
Doxorubicin Induced Cardiotoxicity	SMPD2	0.135633	6.88705	13.759	2020-01-22
Low-Density Lipoproteins and Chemokines in Atherosclerosis	ACAT1	0.135633	6.88705	13.759	2020-01-22
G1/S Damage Checkpoint	ATM	0.135633	6.88705	13.759	2020-01-22
Telomere Maintenance	ATM	0.135633	6.88705	13.759	2020-01-22
beta-Cell Function Inhibition by Ciclosporine and Tacrolimus (Rodent Model)	SREBF1	0.141344	6.58762	12.8891	2020-01-23
Coagulation Cascade	F2	0.141344	6.58762	12.8891	2020-01-23
Proteins Involved in Hirschsprung Disease	NCAM1	0.141344	6.58762	12.8891	2020-01-23
Telogen Maintenance in Androgenic Alopecia	CD200	0.141344	6.58762	12.8891	2020-01-23
Thrombophilia Hereditary	F2	0.141344	6.58762	12.8891	2020-01-23
Toll-like Receptors (TLR) in Antiviral Innate Immune Response	NFKB1	0.141344	6.58762	12.8891	2020-01-23
Hereditary Thrombophilia and Pregnancy Complications	F2	0.141344	6.58762	12.8891	2020-01-23
Werner Syndrome (Adult Progeria)	ATM	0.141344	6.58762	12.8891	2020-01-23
CUL4/CRL (SCF4) Complex	SIN3A	0.141344	6.58762	12.8891	2020-01-23
Macroautophagy Decline	ATG13	0.141344	6.58762	12.8891	2020-01-23
Proteins Involved in Hypoxia-Induced Pulmonary Hypertension	ID1	0.147018	6.31313	12.1036	2020-01-24
Lipoxins and Resolvins in Inflammation Resolution	F2	0.147018	6.31313	12.1036	2020-01-24
TRRAP/TIP60 in Chromatin Remodeling	EPC1	0.147018	6.31313	12.1036	2020-01-24
Adiponectin in Insulin Resistance Prevention	SREBF1	0.147018	6.31313	12.1036	2020-01-24
Platelet and Coagulation Cascade Activation by Antiphospholipid Antibodies	F2	0.147018	6.31313	12.1036	2020-01-24
Antiphospholipid Antibodies in Platelets and Coagulation Cascade	F2	0.147018	6.31313	12.1036	2020-01-24
T-Cell Acute Lymphoblastic Leukemia	TAL1;TCF12	0.148154	2.94204	5.61784	2/103
Antiviral Signaling through Pattern Recognition Receptors	NFKB1	0.152654	6.06061	11.3914	2020-01-25
Blood-Brain Barrier Disruption in Epileptiform Disorders	F2	0.152654	6.06061	11.3914	2020-01-25
Enterocyte Mediated Mucosal Damage in Celiac Disease	NFKB1	0.152654	6.06061	11.3914	2020-01-25
Lipids Enhance Apoptotic Cell Engulfment and Reduce Inflammation	SREBF1	0.152654	6.06061	11.3914	2020-01-25
Lipogenesis Regulation in Adipocyte	SREBF1	0.152654	6.06061	11.3914	2020-01-25
Hereditary Hemorrhagic Telangiectasia	ID1	0.152654	6.06061	11.3914	2020-01-25
Persistent Double Strand DNA non-Homologous Repair in Cancer	ATM	0.152654	6.06061	11.3914	2020-01-25
Myeloid Cell Differentiation Block in Leukemia	FLT3	0.152654	6.06061	11.3914	2020-01-25
Single Strand Nucleotide Excision DNA Repair Suppression in Cancer	RFC1	0.152654	6.06061	11.3914	2020-01-25
Cell Cycle Overiew	ATM;MAD1L1	0.157338	2.83206	5.23749	2/107
Cell Cycle Dysregulation in Mantle Cell Lymphoma	ATM	0.158253	5.82751	10.7433	2020-01-26
Mitochondrial Dysfunction in Alzheimer's Disease	ACAT1	0.158253	5.82751	10.7433	2020-01-26
Dectin-1 (CLEC7A) Signaling	NFKB1	0.163816	5.61167	10.1516	2020-01-27
SNS Related Adrenal Cortex Response	PNMT	0.163816	5.61167	10.1516	2020-01-27
Genes with Mutations in Cancer-Associated Sustaining of Proliferative Signaling	FLT3;ATM	0.168965	2.70563	4.81078	2/112
NF-kB non-Canonical Signaling	NFKB1	0.169343	5.41126	9.60948	2020-01-28
Proteins with Altered Expression in Ovarian Cancer	LPAR2	0.169343	5.41126	9.60948	2020-01-28
Il17 Signaling Related Neutrophilia in Asthma	IL12RB1	0.169343	5.41126	9.60948	2020-01-28
Histone Methylation	SIN3A	0.169343	5.41126	9.60948	2020-01-28
Primary Mediastinal B-cell Lymphoma (PMBL) Subtype	PDCD1LG2	0.174833	5.22466	9.11142	2020-01-29
Autophagic-Lysosomal System Decline Associated with Aging	ATG13	0.174833	5.22466	9.11142	2020-01-29
FLT3/KIT/MLL Signaling in Leukemia	FLT3	0.174833	5.22466	9.11142	2020-01-29
RARA Signaling in Acute Myeloid Leukemia (M3)	FLT3	0.174833	5.22466	9.11142	2020-01-29
SPP1 Induced Survival of Myelin Specific T-Cells in Multiple Sclerosis	NFKB1	0.174833	5.22466	9.11142	2020-01-29
Hyperseborrhea in Acne Vulgaris	SREBF1	0.174833	5.22466	9.11142	2020-01-29
Adipocyte Hypertrophy and Hyperplasia	SREBF1	0.174833	5.22466	9.11142	2020-01-29
Enamel Formation Disruption	ID1	0.180287	5.05051	8.65256	2020-01-30
Thyroid Hormones in Adipose Tissue Metabolism	SREBF1	0.180287	5.05051	8.65256	2020-01-30
TNFR/NF-kB Classical Pathway in Multiple Myeloma Plasma Cells	NFKB1	0.180287	5.05051	8.65256	2020-01-30
Androgens Promote Scalp Dermal Papilla Regression	ATM	0.180287	5.05051	8.65256	2020-01-30
BMPR2 Signaling	ID1	0.180287	5.05051	8.65256	2020-01-30
Hippo/YAP1 Signaling	ID1	0.185705	4.88759	8.22873	2020-01-31
Th17-Cell Numbers Reduction in HIV	IL12RB1	0.185705	4.88759	8.22873	2020-01-31
NFKB Non-Canonical Signaling Activation in Cancer	NFKB1	0.185705	4.88759	8.22873	2020-01-31
Coagulation Factors and PAR1/2 Receptors (F2R/F2RL1) in Endometriosis	F2	0.191087	4.73485	7.83629	1932-01-01
FOXO1 and SREBP-1C Role in beta-Cell Suppression (Rodent Model)	SREBF1	0.191087	4.73485	7.83629	1932-01-01
Replication Stress Triggers Genomic Instability	ATM	0.191087	4.73485	7.83629	1932-01-01
DNA Damage Checkpoint Impairment in Cancer	ATM	0.191087	4.73485	7.83629	1932-01-01
Lipid Metabolism Impairement in non-Alcoholic Fatty Liver Disease	SREBF1	0.191087	4.73485	7.83629	1932-01-01
Lipogenesis/Lipolysis Activation in Cancer Cells and Cancer-Associated Adipocytes	SREBF1	0.191087	4.73485	7.83629	1932-01-01
Proteins with Altered Expression in Cancer-Associated Dysregulated DNA Repair	ATM	0.191087	4.73485	7.83629	1932-01-01
Apoptosis Block in Acute Myeloid Leukemia Cell	FLT3	0.191087	4.73485	7.83629	1932-01-01
APC/C-CDC20 Complex	MAD1L1	0.196435	4.59137	7.47211	1933-01-01
Receptors and Adaptor Proteins Activated in Cancer	FLT3;GAB2	0.199801	2.42424	3.90408	2/125
Proteins Involved in Acute Myeloid Leukemia	FLT3	0.201747	4.45633	7.13342	1934-01-01
CCR5 Signaling in Macrophages	NFKB1	0.201747	4.45633	7.13342	1934-01-01
mTOR Signaling Activation by Taste Sensor Receptors (Rodent Model)	ATG13	0.201747	4.45633	7.13342	1934-01-01
Glucocorticoids in Insulin Resistance in Skeletal Muscles	SREBF1	0.207025	4.329	6.81783	1935-01-01
Huntingtin Gene Mutation in Striatal Neuron	SIN3A	0.207025	4.329	6.81783	1935-01-01
V(D)J Recombination Activation	FLT3	0.207025	4.329	6.81783	1935-01-01
Genes with Mutation in Cancer-Associated Dysregulated DNA Repair	ATM	0.207025	4.329	6.81783	1935-01-01
Ovarian Cancer	LPAR2;ATM	0.211839	2.331	3.61755	2/130
Lysophosphatidic Acid/LPARs Signaling	LPAR2	0.212267	4.20875	6.52318	1936-01-01
Cochlear Hair Cell Stereocilia Proteins Mutations (Congenital Deafness)	HOMER2	0.212267	4.20875	6.52318	1936-01-01
PI3K/RAC1 Signaling	PIK3CB	0.212267	4.20875	6.52318	1936-01-01
Donohue Syndrome Progression (Hypothesis)	SREBF1	0.212267	4.20875	6.52318	1936-01-01
Lipoxin A4/FPR2-Related Neutrophil Depression	EGR2	0.212267	4.20875	6.52318	1936-01-01
Necrosis	SMPD2	0.212267	4.20875	6.52318	1936-01-01
Thyroid Dysfunction	NFKB1	0.212267	4.20875	6.52318	1936-01-01
ANGPT/TEK Maintains Endothelial Cell Quiescence in Cancer	NFKB1	0.212267	4.20875	6.52318	1936-01-01
Th1-Cell Activation in Crohn's Disease	IL12RB1	0.217476	4.095	6.24762	1937-01-01
Vascular Endothelial Cell Permeability Activation	F2	0.217476	4.095	6.24762	1937-01-01
TERT Activation in Cancer	NFKB1	0.217476	4.095	6.24762	1937-01-01
Proteins Involved in Stem Cell Exhaustion in Aging	ID1	0.22779	3.885	5.7472	1939-01-01
Inhibition of THBS1 Activates Angiogenesis in Cancer	ID1	0.22779	3.885	5.7472	1939-01-01
Proteins Involved in Prostate Cancer	PIK3CB;MAD1L1	0.231238	2.19587	3.21544	2/138
Proteins Involved in Azoospermia	ATM	0.232897	3.78788	5.51955	1940-01-01
SIRT1 Signaling in Aging	SREBF1	0.232897	3.78788	5.51955	1940-01-01
Telomer Attrition Triggers Genomic Instability	ATM	0.232897	3.78788	5.51955	1940-01-01
Apoptosis Block by BCL2 Family Proteins in Cancer	NFKB1	0.232897	3.78788	5.51955	1940-01-01
Kinetochore Assembly	MAD1L1	0.232897	3.78788	5.51955	1940-01-01
DNA Persistent Repair Inhibits mTOR Signaling	ATM	0.23797	3.69549	5.30529	1941-01-01
Proteins Involved in Thrombophilia	F2	0.23797	3.69549	5.30529	1941-01-01
Th17-Cell Activation in Crohn's Disease	IL12RB1	0.23797	3.69549	5.30529	1941-01-01
Insulin Resistance in Myocytes Induced by Obesity	SREBF1	0.23797	3.69549	5.30529	1941-01-01
Megakaryocyte -> Platelet Precursor Cell Surface Expression Markers	FLT3	0.23797	3.69549	5.30529	1941-01-01
Proteins Involved in Mucinous Ovarian Carcinoma	ATM	0.248016	3.52361	4.91283	1943-01-01
IgE Induces Airway Smooth Muscle Cell Proliferation	GAB2	0.248016	3.52361	4.91283	1943-01-01
T-Cells Differentiation Block in Psoriasis	IL12RB1	0.25299	3.44353	4.7328	1944-01-01
Translation	DARS	0.25299	3.44353	4.7328	1944-01-01
Alveolar Macrophage Negative Regulation Declined in COPD	CD200	0.25299	3.44353	4.7328	1944-01-01
Hemapoietic Stem Cell -> Lymphoid Multipotent Progenitor Surface Expression Markers	FLT3	0.257931	3.367	4.5625	1945-01-01
Proteins Involved in Clear Cell Ovarian Carcinoma	ATM	0.26284	3.29381	4.40122	1946-01-01
Oncogene Induced Cellular Senescence	ATM	0.26284	3.29381	4.40122	1946-01-01
Toll-like Receptors in beta-Cell	IL12RB1	0.26284	3.29381	4.40122	1946-01-01
Suppression of Caspase Activity in Cancer	NFKB1	0.26284	3.29381	4.40122	1946-01-01
FibronectinR -> AP-1/ELK/SRF/SREBF Signaling	SREBF1	0.267716	3.22373	4.24832	1947-01-01
BSG (CD147) in Cancer Cells Motility, Invasion and Survival	EGR2	0.267716	3.22373	4.24832	1947-01-01
Proteins with Altered Expression in Cancer-Associated Resisting to Cell Death	NFKB1	0.267716	3.22373	4.24832	1947-01-01
Osteoclast Activation in Psoriatic Arthritis	NFKB1	0.267716	3.22373	4.24832	1947-01-01
AXL Receptor Tyrosine Kinase Signaling	FLT3	0.267716	3.22373	4.24832	1947-01-01
Proteins Involved in Low-Grade Serous Ovarian Carcinoma	ATM	0.272561	3.15657	4.1032	1948-01-01
Diffuse Large-B-Cell Lymphoma ABC Subtype	NFKBIZ	0.272561	3.15657	4.1032	1948-01-01
mTOR Signaling Hyperfunction	ID1	0.272561	3.15657	4.1032	1948-01-01
Gluten Impact on Neuronal System (Hypothesis)	NFKB1	0.272561	3.15657	4.1032	1948-01-01
Proteins with Altered Expression in Cancer Immune Escape	PDCD1LG2	0.272561	3.15657	4.1032	1948-01-01
Mast-Cell Activation without Degranulation	F2	0.277373	3.09215	3.96534	1949-01-01
Platelet Activation via GPCR Signaling	F2	0.277373	3.09215	3.96534	1949-01-01
CDH2 Activation Promotes Cancer Cell Migration and Survival	NCAM1	0.277373	3.09215	3.96534	1949-01-01
Insulin Resistance in Hepatocytes	SREBF1	0.277373	3.09215	3.96534	1949-01-01
Polycystins Mutation Effects in Cystic Kidney Disease	PIK3CB	0.277373	3.09215	3.96534	1949-01-01
Proteins Involved in Endometrial Cancer	ATM	0.282154	3.0303	3.83425	1950-01-01
Th17-Cell Function in Systemic Lupus Erythematosus	IL12RB1	0.282154	3.0303	3.83425	1950-01-01
Natural Killer Cell in Diabetes Mellitus Type 1	PDCD1LG2	0.282154	3.0303	3.83425	1950-01-01
Plasmin Role in Glomerulonephritis	F2	0.282154	3.0303	3.83425	1950-01-01
Natural Killer Cell Inhibitory Receptor Signaling	DOK1	0.286904	2.97089	3.70947	1951-01-01
Apoptosis Block by Death Receptor Signaling in Cancer	NFKB1	0.286904	2.97089	3.70947	1951-01-01
Celiac Disease	NFKB1	0.291622	2.91375	3.5906	1952-01-01
NF-kB Canonical Signaling	NFKB1	0.291622	2.91375	3.5906	1952-01-01
Adipokines and Cytokines in Insulin Resistance in Skeletal Muscles	SREBF1	0.29631	2.85878	3.47727	1953-01-01
Catecholamines Secretion from Adrenal Gland	PNMT	0.300967	2.80584	3.36912	1954-01-01
Endothelial Cell Dysfunction in Glomerulonephritis	F2	0.305593	2.75482	3.26585	1955-01-01
Proteins Involved in B-Cell Chronic Lymphocytic Leukemia	ATM	0.310188	2.70563	3.16714	1956-01-01
CFTR Facilitates Oxidative Stress in Airway Epithelium in CF	SMPD2	0.314754	2.65816	3.07274	1957-01-01
Vascular Endothelial Cell Activation by Blood Coagulation Factors	F2	0.314754	2.65816	3.07274	1957-01-01
Peripheral T-Cell Tolerance	PDCD1LG2	0.31929	2.61233	2.98238	1958-01-01
Effector T-cell Inactivation in Cancer Immune Escape	PDCD1LG2	0.31929	2.61233	2.98238	1958-01-01
Myoblast -> Neutrophil Surface Expression Markers	LPAR2	0.31929	2.61233	2.98238	1958-01-01
Proteins with Altered Expression in Cancer-Associated Sustaining of Proliferative Signaling	ATM;GAB2	0.321473	1.7316	1.96509	2/175
Proteins Involved in Diffuse Large-B-Cell Lymphoma	ATM	0.332718	2.48385	2.73338	1961-01-01
Proteins Involved in Periodontitis	F2	0.332718	2.48385	2.73338	1961-01-01
T-lymphoid precursor cell -> CD8+ Naive T-cell Surface Expression Markers	FLT3	0.332718	2.48385	2.73338	1961-01-01
CD8+ T-Cell Activation	IL12RB1	0.337136	2.44379	2.65706	1962-01-01
Basophil Activation in Asthma	GAB2	0.341524	2.405	2.58378	1963-01-01
CD8+ T-Cell Response in Celiac Disease	NFKB1	0.341524	2.405	2.58378	1963-01-01
Dendritic Cell Dysfunction in Psoriatic Arthritis	NFKB1	0.341524	2.405	2.58378	1963-01-01
Th17-Cell Differentiation	IL12RB1	0.341524	2.405	2.58378	1963-01-01
Th1-Cell Differentiation	IL12RB1	0.345884	2.36742	2.51338	1964-01-01
Proteins Involved in Diabetic Neuropathy	SREBF1	0.350215	2.331	2.44571	1965-01-01
Th17-Cell Differentiation in Asthma	IL12RB1	0.350215	2.331	2.44571	1965-01-01
Androgens in Sebocyte Maturation	SREBF1	0.350215	2.331	2.44571	1965-01-01
Th17-Cell and Th1 Immune Responsein Psoriatic Arthritis	IL12RB1	0.354517	2.29568	2.38062	1966-01-01
STAT3 and NFkB Activate Inflammation-Induced Tumorigenesis	NFKB1	0.358792	2.26142	2.31799	1967-01-01
T-Cell Maturation (Hypothesis)	IKZF1	0.363038	2.22816	2.25768	1968-01-01
Metabolic Effects of Oncogenes and Tumor Suppressor in Cancer Cells	SREBF1	0.363038	2.22816	2.25768	1968-01-01
Chronic Myeloid Leukemia	GAB2	0.371447	2.1645	2.14361	1970-01-01
Proteins Involved in Systemic Lupus Erythematosus	F2	0.379745	2.10438	2.03757	1972-01-01
Th1-Cells Activation and Proliferation in Atherosclerosis	IL12RB1	0.379745	2.10438	2.03757	1972-01-01
Lymphocyte Mediated Myocardial Injury in Myocarditis	IL12RB1	0.379745	2.10438	2.03757	1972-01-01
Proteins Involved in Atherosclerosis	F2;ACAT1	0.381175	1.51515	1.46136	2/200
Myocardial Infarction	ATG13	0.387935	2.0475	1.93881	1974-01-01
TAM Receptor Signaling Activation in Cancer	FLT3	0.387935	2.0475	1.93881	1974-01-01
Endometrioid Ovarian Carcinoma	LPAR2	0.396018	1.99362	1.84668	1976-01-01
Mast-Cell Activation in Asthma	GAB2	0.396018	1.99362	1.84668	1976-01-01
Apoptosis	ATM	0.400019	1.96773	1.80292	1977-01-01
Natural Killer Cell Precursor -> Natural Killer Cell Surface Expression Markers	NCAM1	0.403995	1.9425	1.76059	1978-01-01
TGFB Family in Epithelial to Mesenchymal Transition in Cancer	ID1	0.411867	1.89394	1.68003	1980-01-01
Atopic Dermatitis	IL12RB1	0.415764	1.87056	1.64167	1981-01-01
Proteins Involved in Insulin Resistance	SREBF1	0.415764	1.87056	1.64167	1981-01-01
Clear Cell Ovarian Carcinoma	ATM	0.415764	1.87056	1.64167	1981-01-01
High-Grade Serous Ovarian Carcinoma	LPAR2	0.419636	1.84775	1.60452	1982-01-01
Acute Myeloid Leukemia	FLT3	0.419636	1.84775	1.60452	1982-01-01
Proteins with Altered Expression in Cancer Metabolic Reprogramming	SREBF1	0.431098	1.78253	1.49986	1985-01-01
Mast-Cell Activation via IgE Signaling	GAB2	0.434869	1.7618	1.46707	1986-01-01
T-Cell Cytotoxic Response against Melanocytes in Vitiligo	IL12RB1	0.449706	1.6835	1.34539	1990-01-01
CD4+T-Cell Response in Celiac Disease	IL12RB1	0.453354	1.665	1.31715	1991-01-01
B-Cell Chronic Lymphocytic Leukemia	ATM	0.464156	1.61186	1.23716	1994-01-01
Proteins Involved in Cataract	F2	0.464156	1.61186	1.23716	1994-01-01
Proteins Involved in Pancreatic Cancer	ATM	0.464156	1.61186	1.23716	1994-01-01
Proteins Involved in Melanoma	ID1;NFKB1	0.467308	1.27324	0.968636	2/238
Proteins Involved in Rheumatoid Arthritis	F2	0.471239	1.57828	1.18748	1996-01-01
Proteins Involved in Parkinson's Disease	ATM	0.478229	1.54607	1.14048	1998-01-01
Proteins Involved in Polycystic Ovary Syndrome	CEP70	0.48169	1.53046	1.11793	1999-01-01
Medulloblastoma	ID1	0.498654	1.45688	1.01376	1/104
Mantle Cell Lymphoma	ATM	0.50198	1.443	0.994508	1/105
Proteins Involved in Obesity	SREBF1	0.505285	1.42939	0.975748	1/106
Apoptosis Evasion in Cancer: Overview	NFKB1	0.505285	1.42939	0.975748	1/106
Proteins with Altered Expression in Cancer Metastases	ID1	0.505285	1.42939	0.975748	1/106
Proteins Involved in Endometriosis	F2;NFKB1	0.505606	1.18371	0.807288	2/256
Proteins Involved in Diabetes Mellitus Type 2	SREBF1	0.534061	1.31752	0.826411	1/115
Proteins Involved in Epilepsy	HLF;F2	0.534148	1.12233	0.703796	2/270
Pancreatic Ductal Carcinoma	ATM	0.540226	1.295	0.797419	1/117
Proteins Involved in Glomerulonephritis	F2	0.552316	1.25219	0.743345	1/121
Proteins Involved in Glioma	ATM;F2	0.572947	1.04493	0.581988	2/290
Proteins Involved in Alzheimer's Disease	F2	0.578375	1.1655	0.63815	1/130
Proteins Involved in Ulcerative Colitis	F2	0.608189	1.07458	0.534353	1/141
Proteins Involved in Age-Related Macular Degeneration	CD200	0.626063	1.02375	0.479428	1/148
Proteins Involved in Diabetic Nephropathy	SREBF1	0.687738	0.865801	0.32411	1/175
Proteins Involved in Amyotrophic Lateral Sclerosis	NCAM1	0.700008	0.8371	0.298563	1/181
Proteins Involved in Neuroblastoma	F2	0.762619	0.701459	0.190093	1/216
Proteins Involved in Myocardial Ischemia	F2	0.813496	0.601251	0.124107	1/252

## Sheet: S.Data6
Supplementary Data 6: Other phenotype definitions used in the UK Biobank COVID-19 sensitivity analyses
Phenotype	Data field	Field name	Data code	Data code definition	Inclusion	Notes
Coronary Artery Disease SOFT	20002	Non-cancer illness code, self-reported	1074	angina	1
Coronary Artery Disease SOFT	20002	Non-cancer illness code, self-reported	1075	heart attack/myocardial infarction	1
Coronary Artery Disease SOFT	20004	Operation code, self-reported	1070	coronary angioplasty (ptca) +/- stent	1
Coronary Artery Disease SOFT	20004	Operation code, self-reported	1095	coronary artery bypass grafts (cabg)	1
Coronary Artery Disease SOFT	20004	Operation code, self-reported	1523	triple heart bypass	1
Coronary Artery Disease SOFT	6150	Vascular/heart problems diagnosed by doctor	1	Heart attack	1
Coronary Artery Disease SOFT	6150	Vascular/heart problems diagnosed by doctor	2	Angina	1
Coronary Artery Disease SOFT	41202	Diagnoses - main ICD10	I20	Angina pectoris	1
Coronary Artery Disease SOFT	41204	Diagnoses - secondary ICD10	I20	Angina pectoris	1
Coronary Artery Disease SOFT	40001	Underlying (primary) cause of death: ICD10	I20	Angina pectoris	1
Coronary Artery Disease SOFT	40002	Contributory (secondary) causes of death: ICD10	I20	Angina pectoris	1
Coronary Artery Disease SOFT	41202	Diagnoses - main ICD10	I20.0	Unstable angina	1
Coronary Artery Disease SOFT	41204	Diagnoses - secondary ICD10	I20.0	Unstable angina	1
Coronary Artery Disease SOFT	40001	Underlying (primary) cause of death: ICD10	I20.0	Unstable angina	1
Coronary Artery Disease SOFT	40002	Contributory (secondary) causes of death: ICD10	I20.0	Unstable angina	1
Coronary Artery Disease SOFT	41202	Diagnoses - main ICD10	I20.1	Angina pectoris with documented spasm	1
Coronary Artery Disease SOFT	41204	Diagnoses - secondary ICD10	I20.1	Angina pectoris with documented spasm	1
Coronary Artery Disease SOFT	40001	Underlying (primary) cause of death: ICD10	I20.1	Angina pectoris with documented spasm	1
Coronary Artery Disease SOFT	40002	Contributory (secondary) causes of death: ICD10	I20.1	Angina pectoris with documented spasm	1
Coronary Artery Disease SOFT	41202	Diagnoses - main ICD10	I20.8	Other forms of angina pectoris	1
Coronary Artery Disease SOFT	41204	Diagnoses - secondary ICD10	I20.8	Other forms of angina pectoris	1
Coronary Artery Disease SOFT	40001	Underlying (primary) cause of death: ICD10	I20.8	Other forms of angina pectoris	1
Coronary Artery Disease SOFT	40002	Contributory (secondary) causes of death: ICD10	I20.8	Other forms of angina pectoris	1
Coronary Artery Disease SOFT	41202	Diagnoses - main ICD10	I20.9	Angina pectoris, unspecified	1
Coronary Artery Disease SOFT	41204	Diagnoses - secondary ICD10	I20.9	Angina pectoris, unspecified	1
Coronary Artery Disease SOFT	40001	Underlying (primary) cause of death: ICD10	I20.9	Angina pectoris, unspecified	1
Coronary Artery Disease SOFT	40002	Contributory (secondary) causes of death: ICD10	I20.9	Angina pectoris, unspecified	1
Coronary Artery Disease SOFT	41202	Diagnoses - main ICD10	I21	Acute myocardial infarction	1
Coronary Artery Disease SOFT	41204	Diagnoses - secondary ICD10	I21	Acute myocardial infarction	1
Coronary Artery Disease SOFT	40001	Underlying (primary) cause of death: ICD10	I21	Acute myocardial infarction	1
Coronary Artery Disease SOFT	40002	Contributory (secondary) causes of death: ICD10	I21	Acute myocardial infarction	1
Coronary Artery Disease SOFT	41202	Diagnoses - main ICD10	I21.0	Acute transmural myocardial infarction of anterior wall	1
Coronary Artery Disease SOFT	41204	Diagnoses - secondary ICD10	I21.0	Acute transmural myocardial infarction of anterior wall	1
Coronary Artery Disease SOFT	40001	Underlying (primary) cause of death: ICD10	I21.0	Acute transmural myocardial infarction of anterior wall	1
Coronary Artery Disease SOFT	40002	Contributory (secondary) causes of death: ICD10	I21.0	Acute transmural myocardial infarction of anterior wall	1
Coronary Artery Disease SOFT	41202	Diagnoses - main ICD10	I21.1	Acute transmural myocardial infarction of inferior wall	1
Coronary Artery Disease SOFT	41204	Diagnoses - secondary ICD10	I21.1	Acute transmural myocardial infarction of inferior wall	1
Coronary Artery Disease SOFT	40001	Underlying (primary) cause of death: ICD10	I21.1	Acute transmural myocardial infarction of inferior wall	1
Coronary Artery Disease SOFT	40002	Contributory (secondary) causes of death: ICD10	I21.1	Acute transmural myocardial infarction of inferior wall	1
Coronary Artery Disease SOFT	41202	Diagnoses - main ICD10	I21.2	Acute transmural myocardial infarction of other sites	1
Coronary Artery Disease SOFT	41204	Diagnoses - secondary ICD10	I21.2	Acute transmural myocardial infarction of other sites	1
Coronary Artery Disease SOFT	40001	Underlying (primary) cause of death: ICD10	I21.2	Acute transmural myocardial infarction of other sites	1
Coronary Artery Disease SOFT	40002	Contributory (secondary) causes of death: ICD10	I21.2	Acute transmural myocardial infarction of other sites	1
Coronary Artery Disease SOFT	41202	Diagnoses - main ICD10	I21.3	Acute transmural myocardial infarction of unspecified site	1
Coronary Artery Disease SOFT	41204	Diagnoses - secondary ICD10	I21.3	Acute transmural myocardial infarction of unspecified site	1
Coronary Artery Disease SOFT	40001	Underlying (primary) cause of death: ICD10	I21.3	Acute transmural myocardial infarction of unspecified site	1
Coronary Artery Disease SOFT	40002	Contributory (secondary) causes of death: ICD10	I21.3	Acute transmural myocardial infarction of unspecified site	1
Coronary Artery Disease SOFT	41202	Diagnoses - main ICD10	I21.4	Acute subendocardial myocardial infarction	1
Coronary Artery Disease SOFT	41204	Diagnoses - secondary ICD10	I21.4	Acute subendocardial myocardial infarction	1
Coronary Artery Disease SOFT	40001	Underlying (primary) cause of death: ICD10	I21.4	Acute subendocardial myocardial infarction	1
Coronary Artery Disease SOFT	40002	Contributory (secondary) causes of death: ICD10	I21.4	Acute subendocardial myocardial infarction	1
Coronary Artery Disease SOFT	41202	Diagnoses - main ICD10	I21.9	Acute myocardial infarction, unspecified	1
Coronary Artery Disease SOFT	41204	Diagnoses - secondary ICD10	I21.9	Acute myocardial infarction, unspecified	1
Coronary Artery Disease SOFT	40001	Underlying (primary) cause of death: ICD10	I21.9	Acute myocardial infarction, unspecified	1
Coronary Artery Disease SOFT	40002	Contributory (secondary) causes of death: ICD10	I21.9	Acute myocardial infarction, unspecified	1
Coronary Artery Disease SOFT	41202	Diagnoses - main ICD10	I22	Subsequent myocardial infarction	1
Coronary Artery Disease SOFT	41204	Diagnoses - secondary ICD10	I22	Subsequent myocardial infarction	1
Coronary Artery Disease SOFT	40001	Underlying (primary) cause of death: ICD10	I22	Subsequent myocardial infarction	1
Coronary Artery Disease SOFT	40002	Contributory (secondary) causes of death: ICD10	I22	Subsequent myocardial infarction	1
Coronary Artery Disease SOFT	41202	Diagnoses - main ICD10	I22.0	Subsequent myocardial infarction of anterior wall	1
Coronary Artery Disease SOFT	41204	Diagnoses - secondary ICD10	I22.0	Subsequent myocardial infarction of anterior wall	1
Coronary Artery Disease SOFT	40001	Underlying (primary) cause of death: ICD10	I22.0	Subsequent myocardial infarction of anterior wall	1
Coronary Artery Disease SOFT	40002	Contributory (secondary) causes of death: ICD10	I22.0	Subsequent myocardial infarction of anterior wall	1
Coronary Artery Disease SOFT	41202	Diagnoses - main ICD10	I22.1	Subsequent myocardial infarction of inferior wall	1
Coronary Artery Disease SOFT	41204	Diagnoses - secondary ICD10	I22.1	Subsequent myocardial infarction of inferior wall	1
Coronary Artery Disease SOFT	40001	Underlying (primary) cause of death: ICD10	I22.1	Subsequent myocardial infarction of inferior wall	1
Coronary Artery Disease SOFT	40002	Contributory (secondary) causes of death: ICD10	I22.1	Subsequent myocardial infarction of inferior wall	1
Coronary Artery Disease SOFT	41202	Diagnoses - main ICD10	I22.8	Subsequent myocardial infarction of other sites	1
Coronary Artery Disease SOFT	41204	Diagnoses - secondary ICD10	I22.8	Subsequent myocardial infarction of other sites	1
Coronary Artery Disease SOFT	40001	Underlying (primary) cause of death: ICD10	I22.8	Subsequent myocardial infarction of other sites	1
Coronary Artery Disease SOFT	40002	Contributory (secondary) causes of death: ICD10	I22.8	Subsequent myocardial infarction of other sites	1
Coronary Artery Disease SOFT	41202	Diagnoses - main ICD10	I22.9	Subsequent myocardial infarction of unspecified site	1
Coronary Artery Disease SOFT	41204	Diagnoses - secondary ICD10	I22.9	Subsequent myocardial infarction of unspecified site	1
Coronary Artery Disease SOFT	40001	Underlying (primary) cause of death: ICD10	I22.9	Subsequent myocardial infarction of unspecified site	1
Coronary Artery Disease SOFT	40002	Contributory (secondary) causes of death: ICD10	I22.9	Subsequent myocardial infarction of unspecified site	1
Coronary Artery Disease SOFT	41202	Diagnoses - main ICD10	I23	Certain current complications following acute myocardial infarction	1
Coronary Artery Disease SOFT	41204	Diagnoses - secondary ICD10	I23	Certain current complications following acute myocardial infarction	1
Coronary Artery Disease SOFT	40001	Underlying (primary) cause of death: ICD10	I23	Certain current complications following acute myocardial infarction	1
Coronary Artery Disease SOFT	40002	Contributory (secondary) causes of death: ICD10	I23	Certain current complications following acute myocardial infarction	1
Coronary Artery Disease SOFT	41202	Diagnoses - main ICD10	I23.0	Haemopericardium as current complication following acute myocardial infarction	1
Coronary Artery Disease SOFT	41204	Diagnoses - secondary ICD10	I23.0	Haemopericardium as current complication following acute myocardial infarction	1
Coronary Artery Disease SOFT	40001	Underlying (primary) cause of death: ICD10	I23.0	Haemopericardium as current complication following acute myocardial infarction	1
Coronary Artery Disease SOFT	40002	Contributory (secondary) causes of death: ICD10	I23.0	Haemopericardium as current complication following acute myocardial infarction	1
Coronary Artery Disease SOFT	41202	Diagnoses - main ICD10	I23.1	Atrial septal defect as current complication following acute myocardial infarction	1
Coronary Artery Disease SOFT	41204	Diagnoses - secondary ICD10	I23.1	Atrial septal defect as current complication following acute myocardial infarction	1
Coronary Artery Disease SOFT	40001	Underlying (primary) cause of death: ICD10	I23.1	Atrial septal defect as current complication following acute myocardial infarction	1
Coronary Artery Disease SOFT	40002	Contributory (secondary) causes of death: ICD10	I23.1	Atrial septal defect as current complication following acute myocardial infarction	1
Coronary Artery Disease SOFT	41202	Diagnoses - main ICD10	I23.2	Ventricular septal defect as current complication following acute myocardial infarction	1
Coronary Artery Disease SOFT	41204	Diagnoses - secondary ICD10	I23.2	Ventricular septal defect as current complication following acute myocardial infarction	1
Coronary Artery Disease SOFT	40001	Underlying (primary) cause of death: ICD10	I23.2	Ventricular septal defect as current complication following acute myocardial infarction	1
Coronary Artery Disease SOFT	40002	Contributory (secondary) causes of death: ICD10	I23.2	Ventricular septal defect as current complication following acute myocardial infarction	1
Coronary Artery Disease SOFT	41202	Diagnoses - main ICD10	I23.3	Rupture of cardiac wall without haemopericardium as current complication following acute myocardial infarction	1
Coronary Artery Disease SOFT	41204	Diagnoses - secondary ICD10	I23.3	Rupture of cardiac wall without haemopericardium as current complication following acute myocardial infarction	1
Coronary Artery Disease SOFT	40001	Underlying (primary) cause of death: ICD10	I23.3	Rupture of cardiac wall without haemopericardium as current complication following acute myocardial infarction	1
Coronary Artery Disease SOFT	40002	Contributory (secondary) causes of death: ICD10	I23.3	Rupture of cardiac wall without haemopericardium as current complication following acute myocardial infarction	1
Coronary Artery Disease SOFT	41202	Diagnoses - main ICD10	I23.4	Rupture of chordae tendineae as current complication following acute myocardial infarction	1
Coronary Artery Disease SOFT	41204	Diagnoses - secondary ICD10	I23.4	Rupture of chordae tendineae as current complication following acute myocardial infarction	1
Coronary Artery Disease SOFT	40001	Underlying (primary) cause of death: ICD10	I23.4	Rupture of chordae tendineae as current complication following acute myocardial infarction	1
Coronary Artery Disease SOFT	40002	Contributory (secondary) causes of death: ICD10	I23.4	Rupture of chordae tendineae as current complication following acute myocardial infarction	1
Coronary Artery Disease SOFT	41202	Diagnoses - main ICD10	I23.5	Rupture of papillary muscle as current complication following acute myocardial infarction	1
Coronary Artery Disease SOFT	41204	Diagnoses - secondary ICD10	I23.5	Rupture of papillary muscle as current complication following acute myocardial infarction	1
Coronary Artery Disease SOFT	40001	Underlying (primary) cause of death: ICD10	I23.5	Rupture of papillary muscle as current complication following acute myocardial infarction	1
Coronary Artery Disease SOFT	40002	Contributory (secondary) causes of death: ICD10	I23.5	Rupture of papillary muscle as current complication following acute myocardial infarction	1
Coronary Artery Disease SOFT	41202	Diagnoses - main ICD10	I23.6	Thrombosis of atrium, auricular appendage and ventricle as current complications following acute myocardial infarction	1
Coronary Artery Disease SOFT	41204	Diagnoses - secondary ICD10	I23.6	Thrombosis of atrium, auricular appendage and ventricle as current complications following acute myocardial infarction	1
Coronary Artery Disease SOFT	40001	Underlying (primary) cause of death: ICD10	I23.6	Thrombosis of atrium, auricular appendage and ventricle as current complications following acute myocardial infarction	1
Coronary Artery Disease SOFT	40002	Contributory (secondary) causes of death: ICD10	I23.6	Thrombosis of atrium, auricular appendage and ventricle as current complications following acute myocardial infarction	1
Coronary Artery Disease SOFT	41202	Diagnoses - main ICD10	I23.8	Other current complications following acute myocardial infarction	1
Coronary Artery Disease SOFT	41204	Diagnoses - secondary ICD10	I23.8	Other current complications following acute myocardial infarction	1
Coronary Artery Disease SOFT	40001	Underlying (primary) cause of death: ICD10	I23.8	Other current complications following acute myocardial infarction	1
Coronary Artery Disease SOFT	40002	Contributory (secondary) causes of death: ICD10	I23.8	Other current complications following acute myocardial infarction	1
Coronary Artery Disease SOFT	41202	Diagnoses - main ICD10	I24	Other acute ischaemic heart diseases	1
Coronary Artery Disease SOFT	41204	Diagnoses - secondary ICD10	I24	Other acute ischaemic heart diseases	1
Coronary Artery Disease SOFT	40001	Underlying (primary) cause of death: ICD10	I24	Other acute ischaemic heart diseases	1
Coronary Artery Disease SOFT	40002	Contributory (secondary) causes of death: ICD10	I24	Other acute ischaemic heart diseases	1
Coronary Artery Disease SOFT	41202	Diagnoses - main ICD10	I24.0	Coronary thrombosis not resulting in myocardial infarction	1
Coronary Artery Disease SOFT	41204	Diagnoses - secondary ICD10	I24.0	Coronary thrombosis not resulting in myocardial infarction	1
Coronary Artery Disease SOFT	40001	Underlying (primary) cause of death: ICD10	I24.0	Coronary thrombosis not resulting in myocardial infarction	1
Coronary Artery Disease SOFT	40002	Contributory (secondary) causes of death: ICD10	I24.0	Coronary thrombosis not resulting in myocardial infarction	1
Coronary Artery Disease SOFT	41202	Diagnoses - main ICD10	I24.1	Dressler's syndrome	1
Coronary Artery Disease SOFT	41204	Diagnoses - secondary ICD10	I24.1	Dressler's syndrome	1
Coronary Artery Disease SOFT	40001	Underlying (primary) cause of death: ICD10	I24.1	Dressler's syndrome	1
Coronary Artery Disease SOFT	40002	Contributory (secondary) causes of death: ICD10	I24.1	Dressler's syndrome	1
Coronary Artery Disease SOFT	41202	Diagnoses - main ICD10	I24.8	Other forms of acute ischaemic heart disease	1
Coronary Artery Disease SOFT	41204	Diagnoses - secondary ICD10	I24.8	Other forms of acute ischaemic heart disease	1
Coronary Artery Disease SOFT	40001	Underlying (primary) cause of death: ICD10	I24.8	Other forms of acute ischaemic heart disease	1
Coronary Artery Disease SOFT	40002	Contributory (secondary) causes of death: ICD10	I24.8	Other forms of acute ischaemic heart disease	1
Coronary Artery Disease SOFT	41202	Diagnoses - main ICD10	I24.9	Acute ischaemic heart disease, unspecified	1
Coronary Artery Disease SOFT	41204	Diagnoses - secondary ICD10	I24.9	Acute ischaemic heart disease, unspecified	1
Coronary Artery Disease SOFT	40001	Underlying (primary) cause of death: ICD10	I24.9	Acute ischaemic heart disease, unspecified	1
Coronary Artery Disease SOFT	40002	Contributory (secondary) causes of death: ICD10	I24.9	Acute ischaemic heart disease, unspecified	1
Coronary Artery Disease SOFT	41202	Diagnoses - main ICD10	I25.1	Atherosclerotic heart disease	1
Coronary Artery Disease SOFT	41204	Diagnoses - secondary ICD10	I25.1	Atherosclerotic heart disease	1
Coronary Artery Disease SOFT	40001	Underlying (primary) cause of death: ICD10	I25.1	Atherosclerotic heart disease	1
Coronary Artery Disease SOFT	40002	Contributory (secondary) causes of death: ICD10	I25.1	Atherosclerotic heart disease	1
Coronary Artery Disease SOFT	41202	Diagnoses - main ICD10	I25.2	Old myocardial infarction	1
Coronary Artery Disease SOFT	41204	Diagnoses - secondary ICD10	I25.2	Old myocardial infarction	1
Coronary Artery Disease SOFT	40001	Underlying (primary) cause of death: ICD10	I25.2	Old myocardial infarction	1
Coronary Artery Disease SOFT	40002	Contributory (secondary) causes of death: ICD10	I25.2	Old myocardial infarction	1
Coronary Artery Disease SOFT	41202	Diagnoses - main ICD10	I25.5	Ischaemic cardiomyopathy	1
Coronary Artery Disease SOFT	41204	Diagnoses - secondary ICD10	I25.5	Ischaemic cardiomyopathy	1
Coronary Artery Disease SOFT	40001	Underlying (primary) cause of death: ICD10	I25.5	Ischaemic cardiomyopathy	1
Coronary Artery Disease SOFT	40002	Contributory (secondary) causes of death: ICD10	I25.5	Ischaemic cardiomyopathy	1
Coronary Artery Disease SOFT	41202	Diagnoses - main ICD10	I25.6	Silent myocardial ischaemia	1
Coronary Artery Disease SOFT	41204	Diagnoses - secondary ICD10	I25.6	Silent myocardial ischaemia	1
Coronary Artery Disease SOFT	40001	Underlying (primary) cause of death: ICD10	I25.6	Silent myocardial ischaemia	1
Coronary Artery Disease SOFT	40002	Contributory (secondary) causes of death: ICD10	I25.6	Silent myocardial ischaemia	1
Coronary Artery Disease SOFT	41202	Diagnoses - main ICD10	I25.8	Other forms of chronic ischaemic heart disease	1
Coronary Artery Disease SOFT	41204	Diagnoses - secondary ICD10	I25.8	Other forms of chronic ischaemic heart disease	1
Coronary Artery Disease SOFT	40001	Underlying (primary) cause of death: ICD10	I25.8	Other forms of chronic ischaemic heart disease	1
Coronary Artery Disease SOFT	40002	Contributory (secondary) causes of death: ICD10	I25.8	Other forms of chronic ischaemic heart disease	1
Coronary Artery Disease SOFT	41202	Diagnoses - main ICD10	I25.9	Chronic ischaemic heart disease, unspecified	1
Coronary Artery Disease SOFT	41204	Diagnoses - secondary ICD10	I25.9	Chronic ischaemic heart disease, unspecified	1
Coronary Artery Disease SOFT	40001	Underlying (primary) cause of death: ICD10	I25.9	Chronic ischaemic heart disease, unspecified	1
Coronary Artery Disease SOFT	40002	Contributory (secondary) causes of death: ICD10	I25.9	Chronic ischaemic heart disease, unspecified	1
Coronary Artery Disease SOFT	41200	Operative procedures - main OPCS	K40	Saphenous vein graft replacement of coronary artery	1
Coronary Artery Disease SOFT	41210	Operative procedures - secondary OPCS	K40	Saphenous vein graft replacement of coronary artery	1
Coronary Artery Disease SOFT	41200	Operative procedures - main OPCS	K40.1	Saphenous vein graft replacement of one coronary artery	1
Coronary Artery Disease SOFT	41210	Operative procedures - secondary OPCS	K40.1	Saphenous vein graft replacement of one coronary artery	1
Coronary Artery Disease SOFT	41200	Operative procedures - main OPCS	K40.2	Saphenous vein graft replacement of two coronary arteries	1
Coronary Artery Disease SOFT	41210	Operative procedures - secondary OPCS	K40.2	Saphenous vein graft replacement of two coronary arteries	1
Coronary Artery Disease SOFT	41200	Operative procedures - main OPCS	K40.3	Saphenous vein graft replacement of three coronary arteries	1
Coronary Artery Disease SOFT	41210	Operative procedures - secondary OPCS	K40.3	Saphenous vein graft replacement of three coronary arteries	1
Coronary Artery Disease SOFT	41200	Operative procedures - main OPCS	K40.4	Saphenous vein graft replacement of four coronary arteries	1
Coronary Artery Disease SOFT	41210	Operative procedures - secondary OPCS	K40.4	Saphenous vein graft replacement of four coronary arteries	1
Coronary Artery Disease SOFT	41200	Operative procedures - main OPCS	K40.8	Other specified saphenous vein graft replacement of coronary artery	1
Coronary Artery Disease SOFT	41210	Operative procedures - secondary OPCS	K40.8	Other specified saphenous vein graft replacement of coronary artery	1
Coronary Artery Disease SOFT	41200	Operative procedures - main OPCS	K40.9	Unspecified saphenous vein graft replacement of coronary artery	1
Coronary Artery Disease SOFT	41210	Operative procedures - secondary OPCS	K40.9	Unspecified saphenous vein graft replacement of coronary artery	1
Coronary Artery Disease SOFT	41200	Operative procedures - main OPCS	K41	Other autograft replacement of coronary artery	1
Coronary Artery Disease SOFT	41210	Operative procedures - secondary OPCS	K41	Other autograft replacement of coronary artery	1
Coronary Artery Disease SOFT	41200	Operative procedures - main OPCS	K41.1	Autograft replacement of one coronary artery	1
Coronary Artery Disease SOFT	41210	Operative procedures - secondary OPCS	K41.1	Autograft replacement of one coronary artery	1
Coronary Artery Disease SOFT	41200	Operative procedures - main OPCS	K41.2	Autograft replacement of two coronary arteries	1
Coronary Artery Disease SOFT	41210	Operative procedures - secondary OPCS	K41.2	Autograft replacement of two coronary arteries	1
Coronary Artery Disease SOFT	41200	Operative procedures - main OPCS	K41.3	Autograft replacement of three coronary arteries	1
Coronary Artery Disease SOFT	41210	Operative procedures - secondary OPCS	K41.3	Autograft replacement of three coronary arteries	1
Coronary Artery Disease SOFT	41200	Operative procedures - main OPCS	K41.4	Autograft replacement of four or more coronary arteries	1
Coronary Artery Disease SOFT	41210	Operative procedures - secondary OPCS	K41.4	Autograft replacement of four or more coronary arteries	1
Coronary Artery Disease SOFT	41200	Operative procedures - main OPCS	K41.8	Other specified other autograft replacement of coronary artery	1
Coronary Artery Disease SOFT	41210	Operative procedures - secondary OPCS	K41.8	Other specified other autograft replacement of coronary artery	1
Coronary Artery Disease SOFT	41200	Operative procedures - main OPCS	K41.9	Unspecified other autograft replacement of coronary artery	1
Coronary Artery Disease SOFT	41210	Operative procedures - secondary OPCS	K41.9	Unspecified other autograft replacement of coronary artery	1
Coronary Artery Disease SOFT	41200	Operative procedures - main OPCS	K42	Allograft replacement of coronary artery	1
Coronary Artery Disease SOFT	41210	Operative procedures - secondary OPCS	K42	Allograft replacement of coronary artery	1
Coronary Artery Disease SOFT	41200	Operative procedures - main OPCS	K42.1	Allograft replacement of one coronary artery	1
Coronary Artery Disease SOFT	41210	Operative procedures - secondary OPCS	K42.1	Allograft replacement of one coronary artery	1
Coronary Artery Disease SOFT	41200	Operative procedures - main OPCS	K42.2	Allograft replacement of two coronary arteries	1
Coronary Artery Disease SOFT	41210	Operative procedures - secondary OPCS	K42.2	Allograft replacement of two coronary arteries	1
Coronary Artery Disease SOFT	41200	Operative procedures - main OPCS	K42.3	Allograft replacement of three coronary arteries	1
Coronary Artery Disease SOFT	41210	Operative procedures - secondary OPCS	K42.3	Allograft replacement of three coronary arteries	1
Coronary Artery Disease SOFT	41200	Operative procedures - main OPCS	K42.4	Allograft replacement of four or more coronary arteries	1
Coronary Artery Disease SOFT	41210	Operative procedures - secondary OPCS	K42.4	Allograft replacement of four or more coronary arteries	1
Coronary Artery Disease SOFT	41200	Operative procedures - main OPCS	K42.8	Other specified allograft replacement of coronary artery	1
Coronary Artery Disease SOFT	41210	Operative procedures - secondary OPCS	K42.8	Other specified allograft replacement of coronary artery	1
Coronary Artery Disease SOFT	41200	Operative procedures - main OPCS	K42.9	Unspecified allograft replacement of coronary artery	1
Coronary Artery Disease SOFT	41210	Operative procedures - secondary OPCS	K42.9	Unspecified allograft replacement of coronary artery	1
Coronary Artery Disease SOFT	41200	Operative procedures - main OPCS	K43	Prosthetic replacement of coronary artery	1
Coronary Artery Disease SOFT	41210	Operative procedures - secondary OPCS	K43	Prosthetic replacement of coronary artery	1
Coronary Artery Disease SOFT	41200	Operative procedures - main OPCS	K43.1	Prosthetic replacement of one coronary artery	1
Coronary Artery Disease SOFT	41210	Operative procedures - secondary OPCS	K43.1	Prosthetic replacement of one coronary artery	1
Coronary Artery Disease SOFT	41200	Operative procedures - main OPCS	K43.2	Prosthetic replacement of two coronary arteries	1
Coronary Artery Disease SOFT	41210	Operative procedures - secondary OPCS	K43.2	Prosthetic replacement of two coronary arteries	1
Coronary Artery Disease SOFT	41200	Operative procedures - main OPCS	K43.3	Prosthetic replacement of three coronary arteries	1
Coronary Artery Disease SOFT	41210	Operative procedures - secondary OPCS	K43.3	Prosthetic replacement of three coronary arteries	1
Coronary Artery Disease SOFT	41200	Operative procedures - main OPCS	K43.4	Prosthetic replacement of four or more coronary arteries	1
Coronary Artery Disease SOFT	41210	Operative procedures - secondary OPCS	K43.4	Prosthetic replacement of four or more coronary arteries	1
Coronary Artery Disease SOFT	41200	Operative procedures - main OPCS	K43.8	Other specified prosthetic replacement of coronary artery	1
Coronary Artery Disease SOFT	41210	Operative procedures - secondary OPCS	K43.8	Other specified prosthetic replacement of coronary artery	1
Coronary Artery Disease SOFT	41200	Operative procedures - main OPCS	K43.9	Unspecified prosthetic replacement of coronary artery	1
Coronary Artery Disease SOFT	41210	Operative procedures - secondary OPCS	K43.9	Unspecified prosthetic replacement of coronary artery	1
Coronary Artery Disease SOFT	41200	Operative procedures - main OPCS	K44	Other replacement of coronary artery	1
Coronary Artery Disease SOFT	41210	Operative procedures - secondary OPCS	K44	Other replacement of coronary artery	1
Coronary Artery Disease SOFT	41200	Operative procedures - main OPCS	K44.1	Replacement of coronary arteries using multiple methods	1
Coronary Artery Disease SOFT	41210	Operative procedures - secondary OPCS	K44.1	Replacement of coronary arteries using multiple methods	1
Coronary Artery Disease SOFT	41200	Operative procedures - main OPCS	K44.2	Revision of replacement of coronary artery	1
Coronary Artery Disease SOFT	41210	Operative procedures - secondary OPCS	K44.2	Revision of replacement of coronary artery	1
Coronary Artery Disease SOFT	41200	Operative procedures - main OPCS	K44.8	Other specified other replacement of coronary artery	1
Coronary Artery Disease SOFT	41210	Operative procedures - secondary OPCS	K44.8	Other specified other replacement of coronary artery	1
Coronary Artery Disease SOFT	41200	Operative procedures - main OPCS	K44.9	Unspecified other replacement of coronary artery	1
Coronary Artery Disease SOFT	41210	Operative procedures - secondary OPCS	K44.9	Unspecified other replacement of coronary artery	1
Coronary Artery Disease SOFT	41200	Operative procedures - main OPCS	K45.1	Double anastomosis of mammary arteries to coronary arteries	1
Coronary Artery Disease SOFT	41210	Operative procedures - secondary OPCS	K45.1	Double anastomosis of mammary arteries to coronary arteries	1
Coronary Artery Disease SOFT	41200	Operative procedures - main OPCS	K45.2	Double anastomosis of thoracic arteries to coronary arteries	1
Coronary Artery Disease SOFT	41210	Operative procedures - secondary OPCS	K45.2	Double anastomosis of thoracic arteries to coronary arteries	1
Coronary Artery Disease SOFT	41200	Operative procedures - main OPCS	K45.3	Anastomosis of mammary artery to left anterior descending coronary artery	1
Coronary Artery Disease SOFT	41210	Operative procedures - secondary OPCS	K45.3	Anastomosis of mammary artery to left anterior descending coronary artery	1
Coronary Artery Disease SOFT	41200	Operative procedures - main OPCS	K45.4	Anastomosis of mammary artery to coronary artery	1
Coronary Artery Disease SOFT	41210	Operative procedures - secondary OPCS	K45.4	Anastomosis of mammary artery to coronary artery	1
Coronary Artery Disease SOFT	41200	Operative procedures - main OPCS	K45.5	Anastomosis of thoracic artery to coronary artery	1
Coronary Artery Disease SOFT	41210	Operative procedures - secondary OPCS	K45.5	Anastomosis of thoracic artery to coronary artery	1
Coronary Artery Disease SOFT	41200	Operative procedures - main OPCS	K45.6	Revision of connection of thoracic artery to coronary artery	1
Coronary Artery Disease SOFT	41210	Operative procedures - secondary OPCS	K45.6	Revision of connection of thoracic artery to coronary artery	1
Coronary Artery Disease SOFT	41200	Operative procedures - main OPCS	K45.8	Other specified connection of thoracic artery to coronary artery	1
Coronary Artery Disease SOFT	41210	Operative procedures - secondary OPCS	K45.8	Other specified connection of thoracic artery to coronary artery	1
Coronary Artery Disease SOFT	41200	Operative procedures - main OPCS	K45.9	Unspecified connection of thoracic artery to coronary artery	1
Coronary Artery Disease SOFT	41210	Operative procedures - secondary OPCS	K45.9	Unspecified connection of thoracic artery to coronary artery	1
Coronary Artery Disease SOFT	41200	Operative procedures - main OPCS	K46	Other bypass of coronary artery	1
Coronary Artery Disease SOFT	41210	Operative procedures - secondary OPCS	K46	Other bypass of coronary artery	1
Coronary Artery Disease SOFT	41200	Operative procedures - main OPCS	K46.1	Double implantation of mammary arteries into heart	1
Coronary Artery Disease SOFT	41210	Operative procedures - secondary OPCS	K46.1	Double implantation of mammary arteries into heart	1
Coronary Artery Disease SOFT	41200	Operative procedures - main OPCS	K46.2	Double implantation of thoracic arteries into heart NEC	1
Coronary Artery Disease SOFT	41210	Operative procedures - secondary OPCS	K46.2	Double implantation of thoracic arteries into heart NEC	1
Coronary Artery Disease SOFT	41200	Operative procedures - main OPCS	K46.3	Implantation of mammary artery into heart NEC	1
Coronary Artery Disease SOFT	41210	Operative procedures - secondary OPCS	K46.3	Implantation of mammary artery into heart NEC	1
Coronary Artery Disease SOFT	41200	Operative procedures - main OPCS	K46.4	Implantation of thoracic artery into heart NEC	1
Coronary Artery Disease SOFT	41210	Operative procedures - secondary OPCS	K46.4	Implantation of thoracic artery into heart NEC	1
Coronary Artery Disease SOFT	41200	Operative procedures - main OPCS	K46.5	Revision of implantation of thoracic artery into heart	1
Coronary Artery Disease SOFT	41210	Operative procedures - secondary OPCS	K46.5	Revision of implantation of thoracic artery into heart	1
Coronary Artery Disease SOFT	41200	Operative procedures - main OPCS	K46.8	Other specified other bypass of coronary artery	1
Coronary Artery Disease SOFT	41210	Operative procedures - secondary OPCS	K46.8	Other specified other bypass of coronary artery	1
Coronary Artery Disease SOFT	41200	Operative procedures - main OPCS	K46.9	Unspecified other bypass of coronary artery	1
Coronary Artery Disease SOFT	41210	Operative procedures - secondary OPCS	K46.9	Unspecified other bypass of coronary artery	1
Coronary Artery Disease SOFT	41200	Operative procedures - main OPCS	K49.1	Percutaneous transluminal balloon angioplasty of one coronary artery	1
Coronary Artery Disease SOFT	41210	Operative procedures - secondary OPCS	K49.1	Percutaneous transluminal balloon angioplasty of one coronary artery	1
Coronary Artery Disease SOFT	41200	Operative procedures - main OPCS	K49.2	Percutaneous transluminal balloon angioplasty of multiple coronary arteries	1
Coronary Artery Disease SOFT	41210	Operative procedures - secondary OPCS	K49.2	Percutaneous transluminal balloon angioplasty of multiple coronary arteries	1
Coronary Artery Disease SOFT	41200	Operative procedures - main OPCS	K49.3	Percutaneous transluminal balloon angioplasty of bypass graft of coronary artery	1
Coronary Artery Disease SOFT	41210	Operative procedures - secondary OPCS	K49.3	Percutaneous transluminal balloon angioplasty of bypass graft of coronary artery	1
Coronary Artery Disease SOFT	41200	Operative procedures - main OPCS	K49.4	Percutaneous transluminal cutting balloon angioplasty of coronary artery	1
Coronary Artery Disease SOFT	41210	Operative procedures - secondary OPCS	K49.4	Percutaneous transluminal cutting balloon angioplasty of coronary artery	1
Coronary Artery Disease SOFT	41200	Operative procedures - main OPCS	K49.8	Other specified transluminal balloon angioplasty of coronary artery	1
Coronary Artery Disease SOFT	41210	Operative procedures - secondary OPCS	K49.8	Other specified transluminal balloon angioplasty of coronary artery	1
Coronary Artery Disease SOFT	41200	Operative procedures - main OPCS	K49.9	Unspecified transluminal balloon angioplasty of coronary artery	1
Coronary Artery Disease SOFT	41210	Operative procedures - secondary OPCS	K49.9	Unspecified transluminal balloon angioplasty of coronary artery	1
Coronary Artery Disease SOFT	41200	Operative procedures - main OPCS	K50.1	Percutaneous transluminal laser coronary angioplasty	1
Coronary Artery Disease SOFT	41210	Operative procedures - secondary OPCS	K50.1	Percutaneous transluminal laser coronary angioplasty	1
Coronary Artery Disease SOFT	41200	Operative procedures - main OPCS	K50.2	Percutaneous transluminal coronary thrombolysis using streptokinase	1
Coronary Artery Disease SOFT	41210	Operative procedures - secondary OPCS	K50.2	Percutaneous transluminal coronary thrombolysis using streptokinase	1
Coronary Artery Disease SOFT	41200	Operative procedures - main OPCS	K50.4	Percutaneous transluminal atherectomy of coronary artery	1
Coronary Artery Disease SOFT	41210	Operative procedures - secondary OPCS	K50.4	Percutaneous transluminal atherectomy of coronary artery	1
Coronary Artery Disease SOFT	41200	Operative procedures - main OPCS	K75.1	Percutaneous transluminal balloon angioplasty and insertion of 1-2 drug-eluting stents into coronary artery	1
Coronary Artery Disease SOFT	41210	Operative procedures - secondary OPCS	K75.1	Percutaneous transluminal balloon angioplasty and insertion of 1-2 drug-eluting stents into coronary artery	1
Coronary Artery Disease SOFT	41200	Operative procedures - main OPCS	K75.2	Percutaneous transluminal balloon angioplasty and insertion of 3 or more drug-eluting stents into coronary artery	1
Coronary Artery Disease SOFT	41210	Operative procedures - secondary OPCS	K75.2	Percutaneous transluminal balloon angioplasty and insertion of 3 or more drug-eluting stents into coronary artery	1
Coronary Artery Disease SOFT	41200	Operative procedures - main OPCS	K75.3	Percutaneous transluminal balloon angioplasty and insertion of 1-2 stents into coronary artery	1
Coronary Artery Disease SOFT	41210	Operative procedures - secondary OPCS	K75.3	Percutaneous transluminal balloon angioplasty and insertion of 1-2 stents into coronary artery	1
Coronary Artery Disease SOFT	41200	Operative procedures - main OPCS	K75.4	Percutaneous transluminal balloon angioplasty and insertion of 3 or more stents into coronary artery NEC	1
Coronary Artery Disease SOFT	41210	Operative procedures - secondary OPCS	K75.4	Percutaneous transluminal balloon angioplasty and insertion of 3 or more stents into coronary artery NEC	1
Coronary Artery Disease SOFT	41200	Operative procedures - main OPCS	K75.8	Other specified percutaneous transluminal balloon angioplasty and insertion of stent into coronary artery	1
Coronary Artery Disease SOFT	41210	Operative procedures - secondary OPCS	K75.8	Other specified percutaneous transluminal balloon angioplasty and insertion of stent into coronary artery	1
Coronary Artery Disease SOFT	41200	Operative procedures - main OPCS	K75.9	Unspecified percutaneous transluminal balloon angioplasty and insertion of stent into coronary artery	1
Coronary Artery Disease SOFT	41210	Operative procedures - secondary OPCS	K75.9	Unspecified percutaneous transluminal balloon angioplasty and insertion of stent into coronary artery	1
Coronary Artery Disease SOFT	41203	Diagnoses - main ICD9	410	Acute myocardial infarction	1
Coronary Artery Disease SOFT	41205	Diagnoses - secondary ICD9	410	Acute myocardial infarction	1
Coronary Artery Disease SOFT	41203	Diagnoses - main ICD9	4109	Acute myocardial infarction	1
Coronary Artery Disease SOFT	41205	Diagnoses - secondary ICD9	4109	Acute myocardial infarction	1
Coronary Artery Disease SOFT	41203	Diagnoses - main ICD9	411	Other acute and subacute forms of ischaemic heart disease	1
Coronary Artery Disease SOFT	41205	Diagnoses - secondary ICD9	411	Other acute and subacute forms of ischaemic heart disease	1
Coronary Artery Disease SOFT	41203	Diagnoses - main ICD9	4119	Other acute and subacute forms of ischaemic heart disease	1
Coronary Artery Disease SOFT	41205	Diagnoses - secondary ICD9	4119	Other acute and subacute forms of ischaemic heart disease	1
Coronary Artery Disease SOFT	41203	Diagnoses - main ICD9	412	Old myocardial infarction	1
Coronary Artery Disease SOFT	41205	Diagnoses - secondary ICD9	412	Old myocardial infarction	1
Coronary Artery Disease SOFT	41203	Diagnoses - main ICD9	4129	Old myocardial infarction	1
Coronary Artery Disease SOFT	41205	Diagnoses - secondary ICD9	4129	Old myocardial infarction	1
Coronary Artery Disease SOFT	41203	Diagnoses - main ICD9	413	Angina pectoris	1
Coronary Artery Disease SOFT	41205	Diagnoses - secondary ICD9	413	Angina pectoris	1
Coronary Artery Disease SOFT	41203	Diagnoses - main ICD9	4139	Angina pectoris	1
Coronary Artery Disease SOFT	41205	Diagnoses - secondary ICD9	4139	Angina pectoris	1
Coronary Artery Disease SOFT	41203	Diagnoses - main ICD9	4140	Coronary atherosclerosis	1
Coronary Artery Disease SOFT	41205	Diagnoses - secondary ICD9	4140	Coronary atherosclerosis	1
Coronary Artery Disease SOFT	41203	Diagnoses - main ICD9	4148	Other specified forms of chronic ischaemic heart disease	1
Coronary Artery Disease SOFT	41205	Diagnoses - secondary ICD9	4148	Other specified forms of chronic ischaemic heart disease	1
Coronary Artery Disease SOFT	41203	Diagnoses - main ICD9	4149	Chronic ischaemic heart disease, unspecified	1
Coronary Artery Disease SOFT	41205	Diagnoses - secondary ICD9	4149	Chronic ischaemic heart disease, unspecified	1
Hypertension	20002	Non-cancer illness code, self-reported	1065	Hypertension	1
Hypertension	20002	Non-cancer illness code, self-reported	1072	Essential hypertension	1
Hypertension	6150	Vascular/heart problems diagnosed by doctor	4	High blood pressure	1
Hypertension	41202	Diagnoses - main ICD10	I10	Essential (primary) hypertension	1
Hypertension	41204	Diagnoses - secondary ICD10	I10	Essential (primary) hypertension	1
Hypertension	40001	Underlying (primary) cause of death: ICD10	I10	Essential (primary) hypertension	1
Hypertension	40002	Contributory (secondary) causes of death: ICD10	I10	Essential (primary) hypertension	1
Hypertension	41202	Diagnoses - main ICD10	I11	Hypertensive heart disease	1
Hypertension	41204	Diagnoses - secondary ICD10	I11	Hypertensive heart disease	1
Hypertension	40001	Underlying (primary) cause of death: ICD10	I11	Hypertensive heart disease	1
Hypertension	40002	Contributory (secondary) causes of death: ICD10	I11	Hypertensive heart disease	1
Hypertension	41202	Diagnoses - main ICD10	I11.0	Hypertensive heart disease with (congestive) heart failure	1
Hypertension	41204	Diagnoses - secondary ICD10	I11.0	Hypertensive heart disease with (congestive) heart failure	1
Hypertension	40001	Underlying (primary) cause of death: ICD10	I11.0	Hypertensive heart disease with (congestive) heart failure	1
Hypertension	40002	Contributory (secondary) causes of death: ICD10	I11.0	Hypertensive heart disease with (congestive) heart failure	1
Hypertension	41202	Diagnoses - main ICD10	I11.9	Hypertensive heart disease without (congestive) heart failure	1
Hypertension	41204	Diagnoses - secondary ICD10	I11.9	Hypertensive heart disease without (congestive) heart failure	1
Hypertension	40001	Underlying (primary) cause of death: ICD10	I11.9	Hypertensive heart disease without (congestive) heart failure	1
Hypertension	40002	Contributory (secondary) causes of death: ICD10	I11.9	Hypertensive heart disease without (congestive) heart failure	1
Hypertension	41202	Diagnoses - main ICD10	I12	Hypertensive renal disease	1
Hypertension	41204	Diagnoses - secondary ICD10	I12	Hypertensive renal disease	1
Hypertension	40001	Underlying (primary) cause of death: ICD10	I12	Hypertensive renal disease	1
Hypertension	40002	Contributory (secondary) causes of death: ICD10	I12	Hypertensive renal disease	1
Hypertension	41202	Diagnoses - main ICD10	I12.0	Hypertensive renal disease with renal failure	1
Hypertension	41204	Diagnoses - secondary ICD10	I12.0	Hypertensive renal disease with renal failure	1
Hypertension	40001	Underlying (primary) cause of death: ICD10	I12.0	Hypertensive renal disease with renal failure	1
Hypertension	40002	Contributory (secondary) causes of death: ICD10	I12.0	Hypertensive renal disease with renal failure	1
Hypertension	41202	Diagnoses - main ICD10	I12.9	Hypertensive renal disease without renal failure	1
Hypertension	41204	Diagnoses - secondary ICD10	I12.9	Hypertensive renal disease without renal failure	1
Hypertension	40001	Underlying (primary) cause of death: ICD10	I12.9	Hypertensive renal disease without renal failure	1
Hypertension	40002	Contributory (secondary) causes of death: ICD10	I12.9	Hypertensive renal disease without renal failure	1
Hypertension	41202	Diagnoses - main ICD10	I13	Hypertensive heart and renal disease	1
Hypertension	41204	Diagnoses - secondary ICD10	I13	Hypertensive heart and renal disease	1
Hypertension	40001	Underlying (primary) cause of death: ICD10	I13	Hypertensive heart and renal disease	1
Hypertension	40002	Contributory (secondary) causes of death: ICD10	I13	Hypertensive heart and renal disease	1
Hypertension	41202	Diagnoses - main ICD10	I13.0	Hypertensive heart and renal disease with (congestive) heart failure	1
Hypertension	41204	Diagnoses - secondary ICD10	I13.0	Hypertensive heart and renal disease with (congestive) heart failure	1
Hypertension	40001	Underlying (primary) cause of death: ICD10	I13.0	Hypertensive heart and renal disease with (congestive) heart failure	1
Hypertension	40002	Contributory (secondary) causes of death: ICD10	I13.0	Hypertensive heart and renal disease with (congestive) heart failure	1
Hypertension	41202	Diagnoses - main ICD10	I13.1	Hypertensive heart and renal disease with renal failure	1
Hypertension	41204	Diagnoses - secondary ICD10	I13.1	Hypertensive heart and renal disease with renal failure	1
Hypertension	40001	Underlying (primary) cause of death: ICD10	I13.1	Hypertensive heart and renal disease with renal failure	1
Hypertension	40002	Contributory (secondary) causes of death: ICD10	I13.1	Hypertensive heart and renal disease with renal failure	1
Hypertension	41202	Diagnoses - main ICD10	I13.2	Hypertensive heart and renal disease with both (congestive) heart failure and renal failure	1
Hypertension	41204	Diagnoses - secondary ICD10	I13.2	Hypertensive heart and renal disease with both (congestive) heart failure and renal failure	1
Hypertension	40001	Underlying (primary) cause of death: ICD10	I13.2	Hypertensive heart and renal disease with both (congestive) heart failure and renal failure	1
Hypertension	40002	Contributory (secondary) causes of death: ICD10	I13.2	Hypertensive heart and renal disease with both (congestive) heart failure and renal failure	1
Hypertension	41202	Diagnoses - main ICD10	I13.9	Hypertensive heart and renal disease, unspecified	1
Hypertension	41204	Diagnoses - secondary ICD10	I13.9	Hypertensive heart and renal disease, unspecified	1
Hypertension	40001	Underlying (primary) cause of death: ICD10	I13.9	Hypertensive heart and renal disease, unspecified	1
Hypertension	40002	Contributory (secondary) causes of death: ICD10	I13.9	Hypertensive heart and renal disease, unspecified	1
Hypertension	41202	Diagnoses - main ICD10	I15	Secondary hypertension	1
Hypertension	41204	Diagnoses - secondary ICD10	I15	Secondary hypertension	1
Hypertension	40001	Underlying (primary) cause of death: ICD10	I15	Secondary hypertension	1
Hypertension	40002	Contributory (secondary) causes of death: ICD10	I15	Secondary hypertension	1
Hypertension	41202	Diagnoses - main ICD10	I15.0	Renovascular hypertension	1
Hypertension	41204	Diagnoses - secondary ICD10	I15.0	Renovascular hypertension	1
Hypertension	40001	Underlying (primary) cause of death: ICD10	I15.0	Renovascular hypertension	1
Hypertension	40002	Contributory (secondary) causes of death: ICD10	I15.0	Renovascular hypertension	1
Hypertension	41202	Diagnoses - main ICD10	I15.1	Hypertension secondary to other renal disorders	1
Hypertension	41204	Diagnoses - secondary ICD10	I15.1	Hypertension secondary to other renal disorders	1
Hypertension	40001	Underlying (primary) cause of death: ICD10	I15.1	Hypertension secondary to other renal disorders	1
Hypertension	40002	Contributory (secondary) causes of death: ICD10	I15.1	Hypertension secondary to other renal disorders	1
Hypertension	41202	Diagnoses - main ICD10	I15.2	Hypertension secondary to endocrine disorders	1
Hypertension	41204	Diagnoses - secondary ICD10	I15.2	Hypertension secondary to endocrine disorders	1
Hypertension	40001	Underlying (primary) cause of death: ICD10	I15.2	Hypertension secondary to endocrine disorders	1
Hypertension	40002	Contributory (secondary) causes of death: ICD10	I15.2	Hypertension secondary to endocrine disorders	1
Hypertension	41202	Diagnoses - main ICD10	I15.8	Other secondary hypertension	1
Hypertension	41204	Diagnoses - secondary ICD10	I15.8	Other secondary hypertension	1
Hypertension	40001	Underlying (primary) cause of death: ICD10	I15.8	Other secondary hypertension	1
Hypertension	40002	Contributory (secondary) causes of death: ICD10	I15.8	Other secondary hypertension	1
Hypertension	41202	Diagnoses - main ICD10	I15.9	Secondary hypertension, unspecified	1
Hypertension	41204	Diagnoses - secondary ICD10	I15.9	Secondary hypertension, unspecified	1
Hypertension	40001	Underlying (primary) cause of death: ICD10	I15.9	Secondary hypertension, unspecified	1
Hypertension	40002	Contributory (secondary) causes of death: ICD10	I15.9	Secondary hypertension, unspecified	1
Hypertension	41203	Diagnoses - main ICD9	401	Essential hypertension	1
Hypertension	41205	Diagnoses - secondary ICD9	401	Essential hypertension	1
Hypertension	41203	Diagnoses - main ICD9	4010	Essential hypertension, specified as malignant	1
Hypertension	41205	Diagnoses - secondary ICD9	4010	Essential hypertension, specified as malignant	1
Hypertension	41203	Diagnoses - main ICD9	4011	Essential hypertension, specified as benign	1
Hypertension	41205	Diagnoses - secondary ICD9	4011	Essential hypertension, specified as benign	1
Hypertension	41203	Diagnoses - main ICD9	4019	Essential hypertension, not specified as malignant or benign	1
Hypertension	41205	Diagnoses - secondary ICD9	4019	Essential hypertension, not specified as malignant or benign	1
Hypertension	41203	Diagnoses - main ICD9	402	Hypertensive heart disease	1
Hypertension	41205	Diagnoses - secondary ICD9	402	Hypertensive heart disease	1
Hypertension	41203	Diagnoses - main ICD9	4020	Hypertensive heart disease, specified as malignant	1
Hypertension	41205	Diagnoses - secondary ICD9	4020	Hypertensive heart disease, specified as malignant	1
Hypertension	41203	Diagnoses - main ICD9	4021	Hypertensive heart disease, specified as benign	1
Hypertension	41205	Diagnoses - secondary ICD9	4021	Hypertensive heart disease, specified as benign	1
Hypertension	41203	Diagnoses - main ICD9	4029	Hypertensive heart disease, not specified as malignant or benign	1
Hypertension	41205	Diagnoses - secondary ICD9	4029	Hypertensive heart disease, not specified as malignant or benign	1
Hypertension	41203	Diagnoses - main ICD9	403	Hypertensive renal disease	1
Hypertension	41205	Diagnoses - secondary ICD9	403	Hypertensive renal disease	1
Hypertension	41203	Diagnoses - main ICD9	4030	Hypertensive renal disease, specified as malignant	1
Hypertension	41205	Diagnoses - secondary ICD9	4030	Hypertensive renal disease, specified as malignant	1
Hypertension	41203	Diagnoses - main ICD9	4031	Hypertensive renal disease, specified as benign	1
Hypertension	41205	Diagnoses - secondary ICD9	4031	Hypertensive renal disease, specified as benign	1
Hypertension	41203	Diagnoses - main ICD9	4039	Hypertensive renal disease, not specified as malignant or benign	1
Hypertension	41205	Diagnoses - secondary ICD9	4039	Hypertensive renal disease, not specified as malignant or benign	1
Hypertension	41203	Diagnoses - main ICD9	404	Hypertensive heart and renal disease	1
Hypertension	41205	Diagnoses - secondary ICD9	404	Hypertensive heart and renal disease	1
Hypertension	41203	Diagnoses - main ICD9	4040	Hypertensive heart and renal disease, specified as malignant	1
Hypertension	41205	Diagnoses - secondary ICD9	4040	Hypertensive heart and renal disease, specified as malignant	1
Hypertension	41203	Diagnoses - main ICD9	4041	Hypertensive heart and renal disease, specified as benign	1
Hypertension	41205	Diagnoses - secondary ICD9	4041	Hypertensive heart and renal disease, specified as benign	1
Hypertension	41203	Diagnoses - main ICD9	4049	Hypertensive heart and renal disease, not specified as malignant or benign	1
Hypertension	41205	Diagnoses - secondary ICD9	4049	Hypertensive heart and renal disease, not specified as malignant or benign	1
Hypertension	41203	Diagnoses - main ICD9	405	Secondary hypertension	1
Hypertension	41205	Diagnoses - secondary ICD9	405	Secondary hypertension	1
Hypertension	41203	Diagnoses - main ICD9	4050	Secondary hypertension, specified as malignant	1
Hypertension	41205	Diagnoses - secondary ICD9	4050	Secondary hypertension, specified as malignant	1
Hypertension	41203	Diagnoses - main ICD9	4051	Secondary hypertension, specified as benign	1
Hypertension	41205	Diagnoses - secondary ICD9	4051	Secondary hypertension, specified as benign	1
Hypertension	41203	Diagnoses - main ICD9	4059	Secondary hypertension, not specified as malignant or benign	1
Hypertension	41205	Diagnoses - secondary ICD9	4059	Secondary hypertension, not specified as malignant or benign	1
Diabetes, Type 2	20002	Non-cancer illness code, self-reported	1223	Type 2 diabetes	1
Diabetes, Type 2	41202	Diagnoses - main ICD10	E11	Non-insulin-dependent diabetes mellitus	1
Diabetes, Type 2	41204	Diagnoses - secondary ICD10	E11	Non-insulin-dependent diabetes mellitus	1
Diabetes, Type 2	40001	Underlying (primary) cause of death: ICD10	E11	Non-insulin-dependent diabetes mellitus	1
Diabetes, Type 2	40002	Contributory (secondary) causes of death: ICD10	E11	Non-insulin-dependent diabetes mellitus	1
Diabetes, Type 2	41202	Diagnoses - main ICD10	E11.0	Non-insulin-dependent diabetes mellitus - with coma	1
Diabetes, Type 2	41204	Diagnoses - secondary ICD10	E11.0	Non-insulin-dependent diabetes mellitus - with coma	1
Diabetes, Type 2	40001	Underlying (primary) cause of death: ICD10	E11.0	Non-insulin-dependent diabetes mellitus - with coma	1
Diabetes, Type 2	40002	Contributory (secondary) causes of death: ICD10	E11.0	Non-insulin-dependent diabetes mellitus - with coma	1
Diabetes, Type 2	41202	Diagnoses - main ICD10	E11.1	Non-insulin-dependent diabetes mellitus - with ketoacidosis	1
Diabetes, Type 2	41204	Diagnoses - secondary ICD10	E11.1	Non-insulin-dependent diabetes mellitus - with ketoacidosis	1
Diabetes, Type 2	40001	Underlying (primary) cause of death: ICD10	E11.1	Non-insulin-dependent diabetes mellitus - with ketoacidosis	1
Diabetes, Type 2	40002	Contributory (secondary) causes of death: ICD10	E11.1	Non-insulin-dependent diabetes mellitus - with ketoacidosis	1
Diabetes, Type 2	41202	Diagnoses - main ICD10	E11.2	Non-insulin-dependent diabetes mellitus - with renal complications	1
Diabetes, Type 2	41204	Diagnoses - secondary ICD10	E11.2	Non-insulin-dependent diabetes mellitus - with renal complications	1
Diabetes, Type 2	40001	Underlying (primary) cause of death: ICD10	E11.2	Non-insulin-dependent diabetes mellitus - with renal complications	1
Diabetes, Type 2	40002	Contributory (secondary) causes of death: ICD10	E11.2	Non-insulin-dependent diabetes mellitus - with renal complications	1
Diabetes, Type 2	41202	Diagnoses - main ICD10	E11.3	Non-insulin-dependent diabetes mellitus - with ophthalmic complications	1
Diabetes, Type 2	41204	Diagnoses - secondary ICD10	E11.3	Non-insulin-dependent diabetes mellitus - with ophthalmic complications	1
Diabetes, Type 2	40001	Underlying (primary) cause of death: ICD10	E11.3	Non-insulin-dependent diabetes mellitus - with ophthalmic complications	1
Diabetes, Type 2	40002	Contributory (secondary) causes of death: ICD10	E11.3	Non-insulin-dependent diabetes mellitus - with ophthalmic complications	1
Diabetes, Type 2	41202	Diagnoses - main ICD10	E11.4	Non-insulin-dependent diabetes mellitus - with neurological complications	1
Diabetes, Type 2	41204	Diagnoses - secondary ICD10	E11.4	Non-insulin-dependent diabetes mellitus - with neurological complications	1
Diabetes, Type 2	40001	Underlying (primary) cause of death: ICD10	E11.4	Non-insulin-dependent diabetes mellitus - with neurological complications	1
Diabetes, Type 2	40002	Contributory (secondary) causes of death: ICD10	E11.4	Non-insulin-dependent diabetes mellitus - with neurological complications	1
Diabetes, Type 2	41202	Diagnoses - main ICD10	E11.5	Non-insulin-dependent diabetes mellitus - with peripheral circulatory complications	1
Diabetes, Type 2	41204	Diagnoses - secondary ICD10	E11.5	Non-insulin-dependent diabetes mellitus - with peripheral circulatory complications	1
Diabetes, Type 2	40001	Underlying (primary) cause of death: ICD10	E11.5	Non-insulin-dependent diabetes mellitus - with peripheral circulatory complications	1
Diabetes, Type 2	40002	Contributory (secondary) causes of death: ICD10	E11.5	Non-insulin-dependent diabetes mellitus - with peripheral circulatory complications	1
Diabetes, Type 2	41202	Diagnoses - main ICD10	E11.6	Non-insulin-dependent diabetes mellitus - with other specified complications	1
Diabetes, Type 2	41204	Diagnoses - secondary ICD10	E11.6	Non-insulin-dependent diabetes mellitus - with other specified complications	1
Diabetes, Type 2	40001	Underlying (primary) cause of death: ICD10	E11.6	Non-insulin-dependent diabetes mellitus - with other specified complications	1
Diabetes, Type 2	40002	Contributory (secondary) causes of death: ICD10	E11.6	Non-insulin-dependent diabetes mellitus - with other specified complications	1
Diabetes, Type 2	41202	Diagnoses - main ICD10	E11.7	Non-insulin-dependent diabetes mellitus - with multiple complications	1
Diabetes, Type 2	41204	Diagnoses - secondary ICD10	E11.7	Non-insulin-dependent diabetes mellitus - with multiple complications	1
Diabetes, Type 2	40001	Underlying (primary) cause of death: ICD10	E11.7	Non-insulin-dependent diabetes mellitus - with multiple complications	1
Diabetes, Type 2	40002	Contributory (secondary) causes of death: ICD10	E11.7	Non-insulin-dependent diabetes mellitus - with multiple complications	1
Diabetes, Type 2	41202	Diagnoses - main ICD10	E11.8	Non-insulin-dependent diabetes mellitus - with unspecified complications	1
Diabetes, Type 2	41204	Diagnoses - secondary ICD10	E11.8	Non-insulin-dependent diabetes mellitus - with unspecified complications	1
Diabetes, Type 2	40001	Underlying (primary) cause of death: ICD10	E11.8	Non-insulin-dependent diabetes mellitus - with unspecified complications	1
Diabetes, Type 2	40002	Contributory (secondary) causes of death: ICD10	E11.8	Non-insulin-dependent diabetes mellitus - with unspecified complications	1
Diabetes, Type 2	41202	Diagnoses - main ICD10	E11.9	Non-insulin-dependent diabetes mellitus - without complications	1
Diabetes, Type 2	41204	Diagnoses - secondary ICD10	E11.9	Non-insulin-dependent diabetes mellitus - without complications	1
Diabetes, Type 2	40001	Underlying (primary) cause of death: ICD10	E11.9	Non-insulin-dependent diabetes mellitus - without complications	1
Diabetes, Type 2	40002	Contributory (secondary) causes of death: ICD10	E11.9	Non-insulin-dependent diabetes mellitus - without complications	1
Asthma	20002	Non-cancer illness code, self-reported	1111	Asthma	1
Asthma	6152	Blood clot, DVT, bronchitis, emphysema, asthma, rhinitis, eczema, allergy diagnosed by doctor	8	Asthma	1
Asthma	41202	Diagnoses - main ICD10	J45	Asthma	1
Asthma	41204	Diagnoses - secondary ICD10	J45	Asthma	1
Asthma	40001	Underlying (primary) cause of death: ICD10	J45	Asthma	1
Asthma	40002	Contributory (secondary) causes of death: ICD10	J45	Asthma	1
Asthma	41202	Diagnoses - main ICD10	J45.0	Predominantly allergic asthma	1
Asthma	41204	Diagnoses - secondary ICD10	J45.0	Predominantly allergic asthma	1
Asthma	40001	Underlying (primary) cause of death: ICD10	J45.0	Predominantly allergic asthma	1
Asthma	40002	Contributory (secondary) causes of death: ICD10	J45.0	Predominantly allergic asthma	1
Asthma	41202	Diagnoses - main ICD10	J45.1	Nonallergic asthma	1
Asthma	41204	Diagnoses - secondary ICD10	J45.1	Nonallergic asthma	1
Asthma	40001	Underlying (primary) cause of death: ICD10	J45.1	Nonallergic asthma	1
Asthma	40002	Contributory (secondary) causes of death: ICD10	J45.1	Nonallergic asthma	1
Asthma	41202	Diagnoses - main ICD10	J45.8	Mixed asthma	1
Asthma	41204	Diagnoses - secondary ICD10	J45.8	Mixed asthma	1
Asthma	40001	Underlying (primary) cause of death: ICD10	J45.8	Mixed asthma	1
Asthma	40002	Contributory (secondary) causes of death: ICD10	J45.8	Mixed asthma	1
Asthma	41202	Diagnoses - main ICD10	J45.9	Asthma, unspecified	1
Asthma	41204	Diagnoses - secondary ICD10	J45.9	Asthma, unspecified	1
Asthma	40001	Underlying (primary) cause of death: ICD10	J45.9	Asthma, unspecified	1
Asthma	40002	Contributory (secondary) causes of death: ICD10	J45.9	Asthma, unspecified	1
Asthma	41202	Diagnoses - main ICD10	J46	Status asthmaticus	1
Asthma	41204	Diagnoses - secondary ICD10	J46	Status asthmaticus	1
Asthma	40001	Underlying (primary) cause of death: ICD10	J46	Status asthmaticus	1
Asthma	40002	Contributory (secondary) causes of death: ICD10	J46	Status asthmaticus	1
Asthma	41203	Diagnosis - main ICD9	493	Asthma	1
Asthma	41205	Diagnoses - secondary ICD9	493	Asthma	1
Asthma	41203	Diagnosis - main ICD9	4930	Extrinsic asthma	1
Asthma	41205	Diagnoses - secondary ICD9	4930	Extrinsic asthma	1
Asthma	41203	Diagnosis - main ICD9	4931	Intrinsic asthma	1
Asthma	41205	Diagnoses - secondary ICD9	4931	Intrinsic asthma	1
Asthma	41203	Diagnosis - main ICD9	4939	Asthma, unspecified	1
Asthma	41205	Diagnoses - secondary ICD9	4939	Asthma, unspecified	1
Asthma	41203	Diagnosis - main ICD9	49399	Asthma, unspecified (without mention of status asthmaticus)	1
Asthma	41205	Diagnoses - secondary ICD9	49399	Asthma, unspecified (without mention of status asthmaticus)	1
Chronic obstructive pulmonary disease	20002	Non-cancer illness code, self-reported	1112	Chronic obstructive airways disease/copd	1
Chronic obstructive pulmonary disease	20002	Non-cancer illness code, self-reported	1113	Emphysema/chronic bronchitis	1
Chronic obstructive pulmonary disease	20002	Non-cancer illness code, self-reported	1472	Emphysema	1
Chronic obstructive pulmonary disease	6152	Blood clot, DVT, bronchitis, emphysema, asthma, rhinitis, eczema, allergy diagnosed by doctor	6	Emphysema/chronic bronchitis	1
Chronic obstructive pulmonary disease	41202	Diagnoses - main ICD10	J41	Simple and mucopurulent chronic bronchitis	1
Chronic obstructive pulmonary disease	41204	Diagnoses - secondary ICD10	J41	Simple and mucopurulent chronic bronchitis	1
Chronic obstructive pulmonary disease	40001	Underlying (primary) cause of death: ICD10	J41	Simple and mucopurulent chronic bronchitis	1
Chronic obstructive pulmonary disease	40002	Contributory (secondary) causes of death: ICD10	J41	Simple and mucopurulent chronic bronchitis	1
Chronic obstructive pulmonary disease	41202	Diagnoses - main ICD10	J41.0	Simple chronic bronchitis	1
Chronic obstructive pulmonary disease	41204	Diagnoses - secondary ICD10	J41.0	Simple chronic bronchitis	1
Chronic obstructive pulmonary disease	40001	Underlying (primary) cause of death: ICD10	J41.0	Simple chronic bronchitis	1
Chronic obstructive pulmonary disease	40002	Contributory (secondary) causes of death: ICD10	J41.0	Simple chronic bronchitis	1
Chronic obstructive pulmonary disease	41202	Diagnoses - main ICD10	J42	Unspecified chronic bronchitis	1
Chronic obstructive pulmonary disease	41204	Diagnoses - secondary ICD10	J42	Unspecified chronic bronchitis	1
Chronic obstructive pulmonary disease	40001	Underlying (primary) cause of death: ICD10	J42	Unspecified chronic bronchitis	1
Chronic obstructive pulmonary disease	40002	Contributory (secondary) causes of death: ICD10	J42	Unspecified chronic bronchitis	1
Chronic obstructive pulmonary disease	41202	Diagnoses - main ICD10	J43	Emphysema	1
Chronic obstructive pulmonary disease	41204	Diagnoses - secondary ICD10	J43	Emphysema	1
Chronic obstructive pulmonary disease	40001	Underlying (primary) cause of death: ICD10	J43	Emphysema	1
Chronic obstructive pulmonary disease	40002	Contributory (secondary) causes of death: ICD10	J43	Emphysema	1
Chronic obstructive pulmonary disease	41202	Diagnoses - main ICD10	J43.0	MacLeod's syndrome	1
Chronic obstructive pulmonary disease	41204	Diagnoses - secondary ICD10	J43.0	MacLeod's syndrome	1
Chronic obstructive pulmonary disease	40001	Underlying (primary) cause of death: ICD10	J43.0	MacLeod's syndrome	1
Chronic obstructive pulmonary disease	40002	Contributory (secondary) causes of death: ICD10	J43.0	MacLeod's syndrome	1
Chronic obstructive pulmonary disease	41202	Diagnoses - main ICD10	J43.1	Panlobular emphysema	1
Chronic obstructive pulmonary disease	41204	Diagnoses - secondary ICD10	J43.1	Panlobular emphysema	1
Chronic obstructive pulmonary disease	40001	Underlying (primary) cause of death: ICD10	J43.1	Panlobular emphysema	1
Chronic obstructive pulmonary disease	40002	Contributory (secondary) causes of death: ICD10	J43.1	Panlobular emphysema	1
Chronic obstructive pulmonary disease	41202	Diagnoses - main ICD10	J43.2	Centrilobular emphysema	1
Chronic obstructive pulmonary disease	41204	Diagnoses - secondary ICD10	J43.2	Centrilobular emphysema	1
Chronic obstructive pulmonary disease	40001	Underlying (primary) cause of death: ICD10	J43.2	Centrilobular emphysema	1
Chronic obstructive pulmonary disease	40002	Contributory (secondary) causes of death: ICD10	J43.2	Centrilobular emphysema	1
Chronic obstructive pulmonary disease	41202	Diagnoses - main ICD10	J43.8	Other emphysema	1
Chronic obstructive pulmonary disease	41204	Diagnoses - secondary ICD10	J43.8	Other emphysema	1
Chronic obstructive pulmonary disease	40001	Underlying (primary) cause of death: ICD10	J43.8	Other emphysema	1
Chronic obstructive pulmonary disease	40002	Contributory (secondary) causes of death: ICD10	J43.8	Other emphysema	1
Chronic obstructive pulmonary disease	41202	Diagnoses - main ICD10	J43.9	Emphysema, unspecified	1
Chronic obstructive pulmonary disease	41204	Diagnoses - secondary ICD10	J43.9	Emphysema, unspecified	1
Chronic obstructive pulmonary disease	40001	Underlying (primary) cause of death: ICD10	J43.9	Emphysema, unspecified	1
Chronic obstructive pulmonary disease	40002	Contributory (secondary) causes of death: ICD10	J43.9	Emphysema, unspecified	1
Chronic obstructive pulmonary disease	41202	Diagnoses - main ICD10	J44	Other chronic obstructive pulmonary disease	1
Chronic obstructive pulmonary disease	41204	Diagnoses - secondary ICD10	J44	Other chronic obstructive pulmonary disease	1
Chronic obstructive pulmonary disease	40001	Underlying (primary) cause of death: ICD10	J44	Other chronic obstructive pulmonary disease	1
Chronic obstructive pulmonary disease	40002	Contributory (secondary) causes of death: ICD10	J44	Other chronic obstructive pulmonary disease	1
Chronic obstructive pulmonary disease	41202	Diagnoses - main ICD10	J44.0	Chronic obstructive pulmonary disease with acute lower respiratory infection	1
Chronic obstructive pulmonary disease	41204	Diagnoses - secondary ICD10	J44.0	Chronic obstructive pulmonary disease with acute lower respiratory infection	1
Chronic obstructive pulmonary disease	40001	Underlying (primary) cause of death: ICD10	J44.0	Chronic obstructive pulmonary disease with acute lower respiratory infection	1
Chronic obstructive pulmonary disease	40002	Contributory (secondary) causes of death: ICD10	J44.0	Chronic obstructive pulmonary disease with acute lower respiratory infection	1
Chronic obstructive pulmonary disease	41202	Diagnoses - main ICD10	J44.1	Chronic obstructive pulmonary disease with acute exacerbation, unspecified	1
Chronic obstructive pulmonary disease	41204	Diagnoses - secondary ICD10	J44.1	Chronic obstructive pulmonary disease with acute exacerbation, unspecified	1
Chronic obstructive pulmonary disease	40001	Underlying (primary) cause of death: ICD10	J44.1	Chronic obstructive pulmonary disease with acute exacerbation, unspecified	1
Chronic obstructive pulmonary disease	40002	Contributory (secondary) causes of death: ICD10	J44.1	Chronic obstructive pulmonary disease with acute exacerbation, unspecified	1
Chronic obstructive pulmonary disease	41202	Diagnoses - main ICD10	J44.8	Other specified chronic obstructive pulmonary disease	1
Chronic obstructive pulmonary disease	41204	Diagnoses - secondary ICD10	J44.8	Other specified chronic obstructive pulmonary disease	1
Chronic obstructive pulmonary disease	40001	Underlying (primary) cause of death: ICD10	J44.8	Other specified chronic obstructive pulmonary disease	1
Chronic obstructive pulmonary disease	40002	Contributory (secondary) causes of death: ICD10	J44.8	Other specified chronic obstructive pulmonary disease	1
Chronic obstructive pulmonary disease	41202	Diagnoses - main ICD10	J44.9	Chronic obstructive pulmonary disease, unspecified	1
Chronic obstructive pulmonary disease	41204	Diagnoses - secondary ICD10	J44.9	Chronic obstructive pulmonary disease, unspecified	1
Chronic obstructive pulmonary disease	40001	Underlying (primary) cause of death: ICD10	J44.9	Chronic obstructive pulmonary disease, unspecified	1
Chronic obstructive pulmonary disease	40002	Contributory (secondary) causes of death: ICD10	J44.9	Chronic obstructive pulmonary disease, unspecified	1
Chronic obstructive pulmonary disease	41203	Diagnosis - main ICD9	491	Chronic bronchitis	1
Chronic obstructive pulmonary disease	41205	Diagnoses - secondary ICD9	491	Chronic bronchitis	1
Chronic obstructive pulmonary disease	41203	Diagnosis - main ICD9	4912	Obstructive chronic bronchitis	1
Chronic obstructive pulmonary disease	41205	Diagnoses - secondary ICD9	4912	Obstructive chronic bronchitis	1
Chronic obstructive pulmonary disease	41203	Diagnosis - main ICD9	4919	Chronic bronchitis, unspecified	1
Chronic obstructive pulmonary disease	41205	Diagnoses - secondary ICD9	4919	Chronic bronchitis, unspecified	1
Chronic obstructive pulmonary disease	41203	Diagnosis - main ICD9	492	Emphysema	1
Chronic obstructive pulmonary disease	41205	Diagnoses - secondary ICD9	492	Emphysema	1
Chronic obstructive pulmonary disease	41203	Diagnosis - main ICD9	4929	Emphysema	1
Chronic obstructive pulmonary disease	41205	Diagnoses - secondary ICD9	4929	Emphysema	1
Chronic obstructive pulmonary disease	41203	Diagnosis - main ICD9	496	Chronic airways obstruction, not elsewhere classified	1
Chronic obstructive pulmonary disease	41205	Diagnoses - secondary ICD9	496	Chronic airways obstruction, not elsewhere classified	1
Chronic obstructive pulmonary disease	41203	Diagnosis - main ICD9	4969	Chronic airways obstruction, not elsewhere classified	1
Chronic obstructive pulmonary disease	41205	Diagnoses - secondary ICD9	4969	Chronic airways obstruction, not elsewhere classified	1

## Sheet: S.Data7
Supplementary Data 7: Other phenotype definitions used in MGB Biobank
cov	cov.code	cov.code.description
Hypertension	I10	Essential (Primary) Hypertension
Hypertension	I11.0	Hypertensive Heart Disease with Heart Failure
Hypertension	I11.9	Hypertensive Heart Disease without Heart Failure
Hypertension	I12.0	Hypertensive Chronic Kidney Disease with Stage 5 Chronic Kidney Disease or end stage renal disease
Hypertension	I12.9	Hypertensive Chronic Kidney Disease with Stage 1 through Stage 4 Chronic Kidney Disease, or unspecified chronic kidney disease
Hypertension	I13.0	Hypertensive heart and chronic kidney disease with heart failure and stage 1 through stage 4 chronic kidney disease, or unspecified chronic kidney disease
Hypertension	I13.10	Hypertensive heart and chronic kidney disease without heart failure, with stage 1 through stage 4 chronic kidney disease, or unspecified chronic kidney disease
Hypertension	I13.11	Hypertensive heart and chronic kidney disease without heart failure, with stage 5 chronic kidney disease, or end stage renal disease
Hypertension	I13.2	Hypertensive heart and chronic kidney disease with heart failure and with stage 5 chronic kidney disease, or end stage renal disease
Hypertension	I15.0	Renovascular Hypertension
Hypertension	I15.1	Hypertension secondary to other renal disorders
Hypertension	I15.2	Hypertension secondary to endocrine disorders
Hypertension	I15.8	Other Secondary Hypertension
Hypertension	I15.9	Secondary hypertension, unspecified
Type 2 Diabetes	E11.00	Type 2 Type 2 Diabetes Mellitus With Hyperosmolarity Without Nonketotic Hyperglycemic-Hyperosmolar Coma (Nkhhc)
Type 2 Diabetes	E11.01	Type 2 Type 2 Diabetes Mellitus With Hyperosmolarity With Coma
Type 2 Diabetes	E11.21	Type 2 Type 2 Diabetes mellitus with diabetic nephropathy
Type 2 Diabetes	E11.22	Type 2 Type 2 Diabetes mellitus with diabetic chronic kidney disease
Type 2 Diabetes	E11.29	Type 2 Type 2 Diabetes mellitus with other diabetic kidney complication
Type 2 Diabetes	E11.311	Type 2 Type 2 Diabetes Mellitus With Unspecified Diabetic Retinopathy With Macular Edema
Type 2 Diabetes	E11.319	Type 2 Type 2 Diabetes Mellitus With Unspecified Diabetic Retinopathy Without Macular Edema
Type 2 Diabetes	E11.321	Type 2 Type 2 Diabetes Mellitus With Mild Nonproliferative Diabetic Retinopathy With Macular Edema
Type 2 Diabetes	E11.329	Type 2 Type 2 Diabetes Mellitus With Mild Nonproliferative Diabetic Retinopathy Without Macular Edema
Type 2 Diabetes	E11.331	Type 2 Type 2 Diabetes Mellitus With Moderate Nonproliferative Diabetic Retinopathy With Macular Edema
Type 2 Diabetes	E11.339	Type 2 Type 2 Diabetes Mellitus with moderate nonproliferative diabetic retinopathy Without Macular Edema
Type 2 Diabetes	E11.341	Type 2 Type 2 Diabetes Mellitus With Severe Nonproliferative Diabetic Retinopathy With Macular Edema
Type 2 Diabetes	E11.349	Type 2 Type 2 Diabetes Mellitus With severe nonproliferative Diabetic Retinopathy Without Macular Edema
Type 2 Diabetes	E11.351	Type 2 Type 2 Diabetes Mellitus with proliferative diabetic retinopathy with macular edema
Type 2 Diabetes	E11.359	Type 2 Type 2 Diabetes Mellitus With proliferative diabetic retinopathy without macular edema
Type 2 Diabetes	E11.36	Type 2 Type 2 Diabetes Mellitus With Diabetic Cataract
Type 2 Diabetes	E11.39	Type 2 Type 2 Diabetes Mellitus With Other Diabetic Ophthalmic Complication
Type 2 Diabetes	E11.40	Type 2 Type 2 Diabetes Mellitus With Diabetic Neuropathy, Unspecified
Type 2 Diabetes	E11.41	Type 2 Type 2 Diabetes Mellitus With Diabetic mononeuropathy
Type 2 Diabetes	E11.42	Type 2 Type 2 Diabetes Melitus with diabetic polyneuropathy
Type 2 Diabetes	E11.51	Type 2 Type 2 Diabetes Mellitus With Diabetic Peripheral Angiopathy Without Gangrene
Type 2 Diabetes	E11.52	Type 2 Type 2 Diabetes Mellitus With diabetic peripheral Angiopathy With Gangrene
Type 2 Diabetes	E11.59	Type 2 Type 2 Diabetes Mellitus with other circulatory complications
Type 2 Diabetes	E11.610	Type 2 Type 2 Diabetes mellitus with diabetic neuropathic arthropathy
Type 2 Diabetes	E11.618	Type 2 Type 2 Diabetes mellitus with other diabetic arthropathy
Type 2 Diabetes	E11.620	Type 2 Type 2 Diabetes Mellitus with diabetic dermatitis
Type 2 Diabetes	E11.621	Type 2 Type 2 Diabetes Mellitus With foot ulcer
Type 2 Diabetes	E11.622	Type 2 Type 2 Diabetes Mellitus With Other Skin ulcer
Type 2 Diabetes	E11.628	Type 2 Type 2 Diabetes Mellitus With other skin complications
Type 2 Diabetes	E11.630	Type 2 Type 2 Diabetes Mellitus With periodontal disease
Type 2 Diabetes	E11.638	Type 2 Type 2 Diabetes Mellitus With other oral complications
Type 2 Diabetes	E11.641	Type 2 Type 2 Diabetes Mellitus With Hypoglycemia With Coma
Type 2 Diabetes	E11.649	Type 2 Type 2 Diabetes Mellitus With Hypoglycemia without coma
Type 2 Diabetes	E11.65	Type 2 Type 2 Diabetes Mellitus With Hyperglycemia
Type 2 Diabetes	E11.69	Type 2 Type 2 Diabetes Mellitus With Other Specified Complication
Type 2 Diabetes	E11.8	Type 2 Type 2 Diabetes Mellitus With Unspecified Complications
Type 2 Diabetes	E11.9	Type 2 Type 2 Diabetes Mellitus Without Complications
Stroke	G45.0	Vertebro-Basilar Artery Syndrome
Stroke	G45.1	Carotid Artery Syndrome
Stroke	G45.2	Multiple and bilateral precerebral artery syndromes
Stroke	G45.3	Amaurosis fugax
Stroke	G45.4	Transient Global Amneisa
Stroke	G45.8	Other transient cerebral ischemic attacks and related syndromes
Stroke	G46.3	Brain stem stroke syndrome
Stroke	G46.4	Cerebellar stroke syndrome
Stroke	H34.00	Transient Retinal Artery Occlusion, Unspecified Eye
Stroke	H34.01	Transient retinal artery occlusion, right eye
Stroke	H34.02	Transient retinal artery occlusion, left eye
Stroke	H34.03	Transient retinal artery occlusion, bilateral
Stroke	H34.10	Central retinal artery occlusion, unspecified eye
Stroke	H34.11	Central retinal artery occlusion, right eye
Stroke	H34.12	Central retinal artery occlusion, left eye
Stroke	H34.13	Central retinal artery occlusion, bilateral
Stroke	H34.211	Partial retinal artery occlusion, right eye
Stroke	H34.212	Partial retinal artery occlusion, left eye
Stroke	H34.213	Partial retinal artery occlusion, bilateral
Stroke	H34.219	Partial Retinal Artery Occlusion, Unspecified Eye
Stroke	H34.231	Retinal artery branch occlusion, right eye
Stroke	H34.232	Retinal artery branch occlusion, left eye
Stroke	H34.233	Retinal artery branch occlusion, bilateral
Stroke	H34.239	Retinal Artery Branch Occlusion, Unspecified Eye
Stroke	H93.099	Unspecified Degenerative and Vascular Disorders of Unspecified Ear
Stroke	I60.9	Nontraumatic Subarachnoid Hemorrhage, Unspecified
Stroke	I61.9	Nontraumatic intracerebral Hemorrhage, unspecified
Stroke	I62.9	Nontraumatic Intracranial Hemorrhage, Unspecified
Stroke	I63.00	Cerebral infarction due to thrombosis of unspecified precerebral artery
Stroke	I63.011	Cerebral infarction due to thrombosis of right vertebral artery
Stroke	I63.012	Cerebral infarction due to thrombosis of left vertebral artery
Stroke	I63.019	Cerebral infarction due to thrombosis of unspecified vertebral artery
Stroke	I63.111	Cerebral infarction due to embolism of right vertebral artery
Stroke	I63.112	Cerebral infarction due to embolism of left vertebral artery
Stroke	I63.119	Cerebral infarction due to embolism of unspecified vertebral artery
Stroke	I63.12	Cerebral infarction due to embolism of basilar artery
Stroke	I63.131	Cerebral infarction due to embolism of right carotid artery
Stroke	I63.132	Cerebral infarction due to embolism of left carotid artery
Stroke	I63.139	Cerebral infarction due to embolism of unspecified carotid artery
Stroke	I63.19	Cerebral infarction due to embolism of other precerebral artery
Stroke	I63.20	Cerebral infarction due to unspecified occlusion or stenosis of unspecified precerebral arteries
Stroke	I63.211	Cerebral infarction due to unspecified occlusion or stenosis of right vertebral arteries
Stroke	I63.212	Cerebral infarction due to unspecified occlusion or stenosis of left vertebral arteries
Stroke	I63.219	Cerebral infarction due to unspecified occlusion or stenosis of unspecified vertebral arteries
Stroke	I63.22	Cerebral Infraction Due to Unspecified Occlusion or Stenosis of Basilar Arteries
Stroke	I63.231	Cerebral infarction due to unspecified occlusion or stenosis of right carotid arteries
Stroke	I63.232	Cerebral infarction due to unspecified occlusion or stenosis of left carotid arteries
Stroke	I63.239	Cerebral infarction due to unspecified occlusion or stenosis of unspecified carotid arteries
Stroke	I63.29	Cerebral infarction due to unspecified occlusion or stenosis of other precerebral arteries
Stroke	I63.30	Cerebral infarction due to thrombosis of unspecified cerebral artery
Stroke	I63.311	Cerebral infarction due to thrombosis of right middle cerebral artery
Stroke	I63.312	Cerebral infarction due to thrombosis of left middle cerebral artery
Stroke	I63.319	Cerebral infarction due to thrombosis of unspecified middle cerebral artery
Stroke	I63.321	Cerebral infarction due to thrombosis of right anterior cerebral artery
Stroke	I63.322	Cerebral infarction due to thrombosis of left anterior cerebral artery
Stroke	I63.329	Cerebral infarction due to thrombosis of unspecified anterior cerebral artery
Stroke	I63.331	Cerebral infarction due to thrombosis of right posterior cerebral artery
Stroke	I63.332	Cerebral infarction due to thrombosis of left posterior cerebral artery
Stroke	I63.339	Cerebral infarction due to thrombosis of unspecified posterior cerebral artery
Stroke	I63.341	Cerebral infarction due to thrombosis of right cerebellar artery
Stroke	I63.342	Cerebral infarction due to thrombosis of left cerebellar artery
Stroke	I63.349	Cerebral infarction due to thrombosis of unspecified cerebellar artery
Stroke	I63.40	Cerebral infarction due to embolism of unspecified cerebral artery
Stroke	I63.411	Cerebral infarction due to embolism of right middle cerebral artery
Stroke	I63.412	Cerebral infarction due to embolism of left middle cerebral artery
Stroke	I63.419	Cerebral infarction due to embolism of unspecified middle cerebral artery
Stroke	I63.421	Cerebral infarction due to embolism of right anterior cerebral artery
Stroke	I63.422	Cerebral infarction due to embolism of left anterior cerebral artery
Stroke	I63.429	Cerebral infarction due to embolism of unspecified anterior cerebral artery
Stroke	I63.431	Cerebral infarction due to embolism of right posterior cerebral artery
Stroke	I63.432	Cerebral infarction due to embolism of left posterior cerebral artery
Stroke	I63.439	Cerebral infarction due to embolism of unspecified posterior cerebral artery
Stroke	I63.49	Cerebral infarction due to embolism of other cerebral artery
Stroke	I63.50	Cerebral infarction due to unspecified occlusion or stenosis of unspecified cerebral artery
Stroke	I63.511	Cerebral infarction due to unspecified occlusion or stenosis of right middle cerebral artery
Stroke	I63.512	Cerebral infarction due to unspecified occlusion or stenosis of left middle cerebral artery
Stroke	I63.519	Cerebral infarction due to unspecified occlusion or stenosis of unspecified middle cerebrl artery
Stroke	I63.521	Cerebral infarction due to unspecified occlusion or stenosis of right anterior cerebral artery
Stroke	I63.522	Cerebral infarction due to unspecified occlusion or stenosis of left anterior cerebral artery
Stroke	I63.529	Cerebral infarction due to unspecified occlusion or stenosis of unspecified anterior cerebral artery
Stroke	I63.531	Cerebral infarction due to unspecified occlusion or stenosis of right posterior cerebral artery
Stroke	I63.532	Cerebral infarction due to unspecified occlusion or stenosis of left posterior cerebral artery
Stroke	I63.539	Cerebral infarction due to unspecified occlusion or stenosis of unspecified posterior cerebral artery
Stroke	I63.541	Cerebral infarction due to unspecified occlusion or stenosis of right cerebellar artery
Stroke	I63.542	Cerebral infarction due to unspecified occlusion or stenosis of left cerebellar artery
Stroke	I63.549	Cerebral infarction due to unspecified occlusion or stenosis of unspecified cerebellar artery
Stroke	I63.59	Cerebral infarction due to unspecified occlusion or stenosis of other cerebral artery
Stroke	I63.6	Cerebral infarction due to cerebral venous thrombosis, nonpyogenic
Stroke	I63.8	Other cerebral infarction
Stroke	I63.9	Cerebral infarction, unspecified
Stroke	I66.01	Occlusion and stenosis of right middle cerebral artery
Stroke	I66.02	Occlusion and stenosis of left middle cerebral artery
Stroke	I66.03	Occlusion and stenosis of bilateral middle cerebral arteries
Stroke	I66.09	Occlusion and stenosis of unspecified middle cerebral artery
Stroke	I66.11	Occlusion and stenosis of right anterior cerebral artery
Stroke	I66.12	Occlusion and stenosis of left anterior cerebral artery
Stroke	I66.13	Occlusion and stenosis of bilateral anterior cerebral arteries
Stroke	I66.19	Occlusion and stenosis of unspecified anterior cerebral artery
Stroke	I66.21	Occlusion and stenosis of right posterior cerebral artery
Stroke	I66.22	Occlusion and stenosis of left posterior cerebral artery
Stroke	I66.23	Occlusion and stenosis of bilateral posterior cerebral arteries
Stroke	I66.29	Occlusion and stenosis of unspecified posterior cerebral artery
Stroke	I66.3	Occlusion and stenosis of cerebellar arteries
Stroke	I66.8	Occlusion and stenosis of other cerebral arteries
Stroke	I66.9	Occlusion and stenosis of unspecified cerebral artery
Stroke	I67.81	Acute cerebrovascular insufficiency
Stroke	I67.82	Cerebral ischemia
Stroke	I67.841	Reversible cerebrovascular vasoconstriction syndrome
Stroke	I67.848	Other cerebrovascular vasospasm and vasoconstriction
Stroke	I67.89	Other cerebrovascular disease
Stroke	I67.9	Cerebrovascular Disease, unspecified
Stroke	I69.80	Unspecified sequelae of other cerebrovascular disease
Stroke	I69.81	Cognitive deficits following other cerebrovascular disease
Stroke	I69.820	Aphasia following other cerebrovascular disease
Stroke	I69.821	Dysphasia following other cerebrovascular disease
Stroke	I69.822	Dysarthria following other cerebrovascular disease
Stroke	I69.823	Fluency disorder following other cerebrovascular disease
Stroke	I69.828	Other speech and language deficits following other cerebrovascular disease
Stroke	I69.831	Monoplegia of upper limb following other cerebrovascular disease affecting right dominant side
Stroke	I69.832	Monoplegia of upper limb following other cerebrovascular disease affecting left dominant side
Stroke	I69.833	Monoplegia of upper limb following other cerebrovascular disease affecting right non-dominant side
Stroke	I69.834	Monoplegia of upper limb following other cerebrovascular disease affecting left non-dominant side
Stroke	I69.839	Monoplegia of upper limb following other cerebrovascular disease affecting unspecified side
Stroke	I69.841	Monoplegia of lower limb following other cerebrovascular disease affecting right dominant side
Stroke	I69.842	Monoplegia of lower limb following other cerebrovascular disease affecting left dominant side
Stroke	I69.843	Monoplegia of lower limb following other cerebrovascular disease affecting right non-dominant side
Stroke	I69.844	Monoplegia of lower limb following other cerebrovascular disease affecting left non-dominant side
Stroke	I69.849	Monoplegia of lower limb following other cerebrovascular disease affecting unspecified side
Stroke	I69.851	Hemiplegia and hemiparesis following other cerebrovascular disease affecting right dominant side
Stroke	I69.852	Hemiplegia and hemiparesis following other cerebrovascular disease affecting left dominant side
Stroke	I69.853	Hemiplegia and hemiparesis following other cerebrovascular disease affecting right non-dominant side
Stroke	I69.854	Hemiplegia and hemiparesis following other cerebrovascular disease affecting left non-dominant side
Stroke	I69.859	Hemiplegia and hemiparesis following other cerebrovascular disease affecting unspecified side
Stroke	I69.861	Other paralytic syndrome following other cerebrovascular disease affecting right dominant side
Stroke	I69.862	Other paralytic syndrome following other cerebrovascular disease affecting left dominant side
Stroke	I69.863	Other paralytic syndrome following other cerebrovascular disease affecting right non-dominant side
Stroke	I69.864	Other paralytic syndrome following other cerebrovascular disease affecting left non-dominant side
Stroke	I69.865	Other paralytic syndrome following other cerebrovascular disease, bilateral
Stroke	I69.869	Other paralytic syndrome following other cerebrovascular disease affecting unspecified side
Stroke	I69.890	Apraxia following other cerebrovascular disease
Stroke	I69.891	Dysphagia following other cerebrovascular disease
Stroke	I69.892	Facial weakness following other cerebrovascular disease
Stroke	I69.893	Ataxia following other cerebrovascular disease
Stroke	I69.898	Other sequelae of other cerebrovascular disease
Stroke	I69.90	Unspecified Sequelae of unspecified cerebrovascular disease
Stroke	I69.91	Cognitive deficits following unspecified cerebrovascular disease
Stroke	I69.920	Aphasia following unspecified cerebrovascular disease
Stroke	I69.921	Dysphasia following unspecified cerebrovascular disease
Stroke	I69.922	Dysarthria following unspecified Cerebrovascular disease
Stroke	I69.923	Fluency disorder following unspecified cerebrovascular disease
Stroke	I69.928	Other speech and language deficits following unspecified cerebrovascular disease
Stroke	I69.931	Monoplegia of upper limb following unspecified cerebrovascular disease affecting right dominant side
Stroke	I69.932	Monoplegia of upper limb following unspecified cerebrovascular disease affecting left dominant side
Stroke	I69.933	Monoplegia of upper limb following unspecified cerebrovascular disease affecting right non-dominant side
Stroke	I69.934	Monoplegia of upper limb following unspecified cerebrovascular disease affecting left non-dominant side
Stroke	I69.939	Monoplegia of upper limb following unspecified cerebrovascular disease affecting unspecified side
Stroke	I69.941	Monoplegia of lower limb following unspecified cerebrovascular disease affecting right dominant side
Stroke	I69.942	Monoplegia of lower limb following unspecified cerebrovascular disease affecting left dominant side
Stroke	I69.943	Monoplegia of lower limb following unspecified cerebrovascular disease affecting right non-dominant side
Stroke	I69.944	Monoplegia of lower limb following unspecified cerebrovascular disease affecting left non-dominant side
Stroke	I69.949	Monoplegia of lower limb following unspecified cerebrovascular disease affecting unspecified side
Stroke	I69.951	Hemiplegia and hemiparesis following unspecified cerebrovascular disease affecting right dominant side
Stroke	I69.952	Hemiplegia and hemiparesis following unspecified cerebrovascular disease affecting left dominant side
Stroke	I69.953	Hemiplegia and hemiparesis following unspecified cerebrovascular disease affecting right non-dominant side
Stroke	I69.954	Hemiplegia and hemiparesis following unspecified cerebrovascular disease affecting left non-dominant side
Stroke	I69.959	Hemiplegia and hemiparesis following unspecified cerebrovascular disease affecting unspecified side
Stroke	I69.961	Other paralytic syndrome following unspecified cerebrovascular disease affecting right dominant side
Stroke	I69.962	Other paralytic syndrome following unspecified cerebrovascular disease affecting left dominant side
Stroke	I69.963	Other paralytic syndrome following unspecified cerebrovascular disease affecting right non-dominant side
Stroke	I69.964	Other paralytic syndrome following unspecified cerebrovascular disease affecting left non-dominant side
Stroke	I69.965	Other paralytic syndrome following unspecified cerebrovascular disease, bilateral
Stroke	I69.969	Other paralytic syndrome following unspecified cerebrovascular disease affecting unspecified side
Stroke	I69.990	Apraxia following unspecified cerebrovascular disease
Stroke	I69.991	Dysphagia following unspecified cerebrovascular disease
Stroke	I69.992	Facial weakness following unspecified cerebrovascular disease
Stroke	I69.993	Ataxia following unspecified cerebrovascular disease
Stroke	I69.998	Other sequelae following unspecified cerebrovascular disease
Stroke	I97.810	Intraoperative Cerebrovascular Infarction During cardiac surgery
Stroke	I97.811	Intraoperative cerebrovascular infarction during other surgery
Stroke	I97.820	Postprocedural cerebrovascular infarction during cardiac surgery
Stroke	I97.821	Postprocedural cerebrovascular infarction during other surgery
Stroke	Z86.73	Personal history of transient ischemic attack (TIA), and cerebral infarction without residual deficits
Coronary Artery Disease	I21	Acute myocardial infarction
Coronary Artery Disease	I21.0	ST elevation (STEMI) myocardial infarction of anterior wall
Coronary Artery Disease	I21.01	ST elevation (STEMI) myocardial infarction involving left main coronary artery
Coronary Artery Disease	I21.02	ST elevation (STEMI) myocardial infarction involving left anterior descending coronary artery
Coronary Artery Disease	I21.09	ST elevation (STEMI) myocardial infarction involving other coronary artery of anterior wall
Coronary Artery Disease	I21.1	ST elevation (STEMI) myocardial infarction of inferior wall
Coronary Artery Disease	I21.11	ST elevation (STEMI) myocardial infarction involving right coronary artery
Coronary Artery Disease	I21.19	ST elevation (STEMI) myocardial infarction involving other coronary artery of inferior wall
Coronary Artery Disease	I21.2	ST elevation (STEMI) myocardial infarction of other sites
Coronary Artery Disease	I21.21	ST elevation (STEMI) myocardial infarction involving left circumflex coronary artery
Coronary Artery Disease	I21.29	ST elevation (STEMI) myocardial infarction involving other sites
Coronary Artery Disease	I21.3	ST elevation (STEMI) myocardial infarction of unspecified site
Coronary Artery Disease	I21.4	Non-ST elevation (NSTEMI) myocardial infarction
Coronary Artery Disease	I21.9	Acute myocardial infarction, unspecified
Coronary Artery Disease	I21.A	Other type of myocardial infarction
Coronary Artery Disease	I21.A1	Myocardial infarction type 2
Coronary Artery Disease	I21.A9	Other myocardial infarction type
Coronary Artery Disease	I22	Subsequent ST elevation (STEMI) and non-ST elevation (NSTEMI) myocardial infarction
Coronary Artery Disease	I22.0	Subsequent ST elevation (STEMI) myocardial infarction of anterior wall
Coronary Artery Disease	I22.1	Subsequent ST elevation (STEMI) myocardial infarction of inferior wall
Coronary Artery Disease	I22.2	Subsequent non-ST elevation (NSTEMI) myocardial infarction
Coronary Artery Disease	I22.8	Subsequent ST elevation (STEMI) myocardial infarction of other sites
Coronary Artery Disease	I22.9	Subsequent ST elevation (STEMI) myocardial infarction of unspecified site
Coronary Artery Disease	I23	Certain current complications following ST elevation (STEMI) and non-ST elevation (NSTEMI) myocardial infarction (within the 28 day period)
Coronary Artery Disease	I23.0	Hemopericardium as current complication following acute myocardial infarction
Coronary Artery Disease	I23.1	Atrial septal defect as current complication following acute myocardial infarction
Coronary Artery Disease	I23.2	Ventricular septal defect as current complication following acute myocardial infarction
Coronary Artery Disease	I23.3	Rupture of cardiac wall without hemopericardium as current complication following acute myocardial infarction
Coronary Artery Disease	I23.4	Rupture of chordae tendineae as current complication following acute myocardial infarction
Coronary Artery Disease	I23.5	Rupture of papillary muscle as current complication following acute myocardial infarction
Coronary Artery Disease	I23.6	Thrombosis of atrium, auricular appendage, and ventricle as current complications following acute myocardial infarction
Coronary Artery Disease	I23.7	Postinfarction angina
Coronary Artery Disease	I23.8	Other current complications following acute myocardial infarction
Coronary Artery Disease	I24	Other acute ischemic heart diseases
Coronary Artery Disease	I24.0	Acute coronary thrombosis not resulting in myocardial infarction
Coronary Artery Disease	I24.1	Dressler's syndrome
Coronary Artery Disease	I24.8	Other forms of acute ischemic heart disease
Coronary Artery Disease	I24.9	Acute ischemic heart disease, unspecified
Coronary Artery Disease	I25	Chronic ischemic heart disease
Coronary Artery Disease	I25.1	Atherosclerotic heart disease of native coronary artery
Coronary Artery Disease	I25.10	…… without angina pectoris
Coronary Artery Disease	I25.11	Atherosclerotic heart disease of native coronary artery with angina pectoris
Coronary Artery Disease	I25.110	Atherosclerotic heart disease of native coronary artery with unstable angina pectoris
Coronary Artery Disease	I25.111	…… with documented spasm
Coronary Artery Disease	I25.118	Atherosclerotic heart disease of native coronary artery with other forms of angina pectoris
Coronary Artery Disease	I25.119	Atherosclerotic heart disease of native coronary artery with unspecified angina pectoris
Coronary Artery Disease	I25.2	Old myocardial infarction
Coronary Artery Disease	I25.5	Ischemic cardiomyopathy
Coronary Artery Disease	I25.6	Silent myocardial ischemia
Coronary Artery Disease	I25.7	Atherosclerosis of coronary artery bypass graft(s) and coronary artery of transplanted heart with angina pectoris
Coronary Artery Disease	I25.70	Atherosclerosis of coronary artery bypass graft(s), unspecified, with angina pectoris
Coronary Artery Disease	I25.700	Atherosclerosis of coronary artery bypass graft(s), unspecified, with unstable angina pectoris
Coronary Artery Disease	I25.701	…… with documented spasm
Coronary Artery Disease	I25.708	Atherosclerosis of coronary artery bypass graft(s), unspecified, with other forms of angina pectoris
Coronary Artery Disease	I25.709	Atherosclerosis of coronary artery bypass graft(s), unspecified, with unspecified angina pectoris
Coronary Artery Disease	I25.71	Atherosclerosis of autologous vein coronary artery bypass graft(s) with angina pectoris
Coronary Artery Disease	I25.710	Atherosclerosis of autologous vein coronary artery bypass graft(s) with unstable angina pectoris
Coronary Artery Disease	I25.711	…… with documented spasm
Coronary Artery Disease	I25.718	Atherosclerosis of autologous vein coronary artery bypass graft(s) with other forms of angina pectoris
Coronary Artery Disease	I25.719	Atherosclerosis of autologous vein coronary artery bypass graft(s) with unspecified angina pectoris
Coronary Artery Disease	I25.72	Atherosclerosis of autologous artery coronary artery bypass graft(s) with angina pectoris
Coronary Artery Disease	I25.720	Atherosclerosis of autologous artery coronary artery bypass graft(s) with unstable angina pectoris
Coronary Artery Disease	I25.721	…… with documented spasm
Coronary Artery Disease	I25.728	Atherosclerosis of autologous artery coronary artery bypass graft(s) with other forms of angina pectoris
Coronary Artery Disease	I25.729	Atherosclerosis of autologous artery coronary artery bypass graft(s) with unspecified angina pectoris
Coronary Artery Disease	I25.73	Atherosclerosis of nonautologous biological coronary artery bypass graft(s) with angina pectoris
Coronary Artery Disease	I25.730	Atherosclerosis of nonautologous biological coronary artery bypass graft(s) with unstable angina pectoris
Coronary Artery Disease	I25.731	…… with documented spasm
Coronary Artery Disease	I25.738	Atherosclerosis of nonautologous biological coronary artery bypass graft(s) with other forms of angina pectoris
Coronary Artery Disease	I25.739	Atherosclerosis of nonautologous biological coronary artery bypass graft(s) with unspecified angina pectoris
Coronary Artery Disease	I25.75	Atherosclerosis of native coronary artery of transplanted heart with angina pectoris
Coronary Artery Disease	I25.750	Atherosclerosis of native coronary artery of transplanted heart with unstable angina
Coronary Artery Disease	I25.751	…… with documented spasm
Coronary Artery Disease	I25.758	Atherosclerosis of native coronary artery of transplanted heart with other forms of angina pectoris
Coronary Artery Disease	I25.759	Atherosclerosis of native coronary artery of transplanted heart with unspecified angina pectoris
Coronary Artery Disease	I25.76	Atherosclerosis of bypass graft of coronary artery of transplanted heart with angina pectoris
Coronary Artery Disease	I25.760	Atherosclerosis of bypass graft of coronary artery of transplanted heart with unstable angina
Coronary Artery Disease	I25.761	…… with documented spasm
Coronary Artery Disease	I25.768	Atherosclerosis of bypass graft of coronary artery of transplanted heart with other forms of angina pectoris
Coronary Artery Disease	I25.769	Atherosclerosis of bypass graft of coronary artery of transplanted heart with unspecified angina pectoris
Coronary Artery Disease	I25.79	Atherosclerosis of other coronary artery bypass graft(s) with angina pectoris
Coronary Artery Disease	I25.790	Atherosclerosis of other coronary artery bypass graft(s) with unstable angina pectoris
Coronary Artery Disease	I25.791	…… with documented spasm
Coronary Artery Disease	I25.798	Atherosclerosis of other coronary artery bypass graft(s) with other forms of angina pectoris
Coronary Artery Disease	I25.799	Atherosclerosis of other coronary artery bypass graft(s) with unspecified angina pectoris
Coronary Artery Disease	I25.8	Other forms of chronic ischemic heart disease
Coronary Artery Disease	I25.81	Atherosclerosis of other coronary vessels without angina pectoris
Coronary Artery Disease	I25.810	Atherosclerosis of coronary artery bypass graft(s) without angina pectoris
Coronary Artery Disease	I25.811	Atherosclerosis of native coronary artery of transplanted heart without angina pectoris
Coronary Artery Disease	I25.812	Atherosclerosis of bypass graft of coronary artery of transplanted heart without angina pectoris
Coronary Artery Disease	I25.82	Chronic total occlusion of coronary artery
Coronary Artery Disease	I25.83	Coronary atherosclerosis due to lipid rich plaque
Coronary Artery Disease	I25.84	Coronary atherosclerosis due to calcified coronary lesion
Coronary Artery Disease	I25.89	Other forms of chronic ischemic heart disease
Coronary Artery Disease	I25.9	Chronic ischemic heart disease, unspecified
Hyperlipidemia	E78.0	Pure hypercholesterolemia
Hyperlipidemia	E78.1	Pure hyperglyceridemia
Hyperlipidemia	E78.2	Mixed Hyperlipidemia
Hyperlipidemia	E78.3	Hyperchylomicronemia
Hyperlipidemia	E78.4	Other hyerlipidemia
Hyperlipidemia	E78.5	Hyperlipidemia, unspecified
Hyperlipidemia	E78.7	Disorders of bile acid and cholesterol metabolism
Hyperlipidemia	E88.1	Lipodystrophy
Hyperlipidemia	E78.81	Lipid dermatoarthritis
Hyperlipidemia	E77.1	Lipidoses
Hyperlipidemia	E88.89	Other specified metabolic disorders
Hyperlipidemia	E75.21	Lipidoses
Hyperlipidemia	E75.22	Lipidoses
Hyperlipidemia	E77.0	Lipidoses
Hyperlipidemia	E78.89	Other lipoprotein metabolism disorders
Hyperlipidemia	E78.6	Lipoprotein deficiency
Hyperlipidemia	E78.9	Disorder of lipoprotein metabolism, unspecified
Hyperlipidemia	E71.30	Disorder of fatty-acid metabolism, unspecified
Hyperlipidemia	E75.5	Other lipid storage disorders
Hyperlipidemia	E78.79	Other disorders of bile acid and cholesterol metabolism
Hyperlipidemia	E75.6	Lipid storage disorder, unspecified
Hyperlipidemia	E78.70	Disorder of bile acid and cholesterol metabolism, unspecified

## Sheet: S.Data8
Supplementary Data 8: Other phenotype definitions used in FinnGen
Covariate or variable used for QC	FinnGen_Endpoint	FinnGen_Description	ICD8	ICD9	ICD10
ASTHMA	J10_ASTHMA	Asthma	493	493	J45,J46
COPD	J10_COPD	COPD	492,49104	492,4912	J43,J44
CAD	I9_ISCHHEART	Ischemic heart diseases	410,412-414	410-414,9960A	I20-I25,Z951,T822
T2D	T2D	Type 2 diabetes, definitions combined	--	250	E11
anyCancer	C3_CANCER	Malignant neoplasm	14-20	14-20	C00-C97
hemeCancer	CD2_HODGKIN_LYMPHOMA	Hodgkin lymphoma	--	201	C81
hemeCancer	CD2_FOLLICULAR_LYMPHOMA	Follicular lymphoma	2000A	--	C82
hemeCancer	CD2_NONFOLLICULAR_LYMPHOMA	Non-follicular lymphoma	200	--	C83
hemeCancer	CD2_TNK_LYMPHOMA	Mature T/NK-cell lymphomas	--	--	C84
hemeCancer	CD2_NONHODGKIN_NAS	Other and unspecified types of non-Hodgkin lymphoma	2008,2009	--	C85
hemeCancer	CD2_OTHER_SPECIAL_TNK_LYMPHOMA	Other specified types of T/NK-cell lymphoma	--	--	C86
hemeCancer	CD2_IMMUNOPROLIFERATIVE	Malignant immunoproliferative diseases	--	--	C88
hemeCancer	CD2_MULTIPLE_MYELOMA_PLASMA_CELL	Multiple myeloma and malignant plasma cell neoplasms	203	203	C90
hemeCancer	CD2_LYMPHOID_LEUKAEMIA	Lymphoid leukaemia	204	204	C91
hemeCancer	CD2_MYELOID_LEUKAEMIA	Myeloid leukaemia	205	205	C92
hemeCancer	CD2_MONOCYTIC_LEUKAEMIA	Monocytic leukaemia	206	206	C93
hemeCancer	CD2_OTHER_LEUKAEMIA_SPECIFIED	Other leukaemias of specified cell type	2070-2078	2070-2072	C94
hemeCancer	CD2_LEUKAEMIA_NAS	Leukaemia of unspecified cell type	207-208	207	C95
hemeCancer	CD2_PRIMARY_LYMPHOID_HEMATOPOIETIC_NAS	Other and unspecified malignant neoplasms of lymphoid, haematopoietic and related tissue	202	202	C96
hemeCancer	POLYCYTVERA	Polycythaemia vera	208	2384	D45
hemeCancer	CHRONMYELOPRO	Chronic myeloproliferative disease	--	--	D471
hemeCancer	THROMBOCYTAEMIA	Essential (haemorrhagic) thrombocythaemia	2872	2387B	D473
